# Supplementary material
Source: publisher figshare collection journal article supplement (https://gsajournals.figshare.com/ndownloader/files/17502344)
Supplement: Supplementary file 1 [file 17502344]

## Sheet: Putative RLPs
TABLE S7 | Identifying candidate RLPs at CE, Cf-11/Cf-3, and AN loci. Putative RLPs identified in ‘Heinz 1706’ v2.30 by bioinformatic analysis of the tomato genome within the target regions of chromosomes 7, 11 and 12 delimited by flanking markers. For chromosome 12 we analysed a 900 kb region delimited by markers C2_ At4g26180 and C2_ At4g16710, for chromosome 7 we analysed a 6 Mb region between…
Motif number (HMM)	chromosome 7 target sequences		Length of motif in bp	Distance in bp from next motif		RLP candidate sequences	Motifs	Number of motifs	Length in bp	Target sequence	Distance from next RLP in bp		Motif number (HMM)	chromosome 11 target sequences		Length of motif in bp	Distance in bp from next motif		Motif number (HMM)	chromosome 12 target sequences		Length of motif in bp	Distance in bp from next motif		RLP candidate sequences	Motifs	Number of motifs	Length in bp	Target sequence	Distance from next RLP in bp
7001	56038229	56038276	47	28		1	7050-7066	17	1883	59348362 - 59350245	479620		11001	1187628	1187675	47	6088		12001	2228649	2228696	47	53251		1	12009 - 12028	20	1802	2769786 - 2771588	862
7002	56038304	56038351	47	195924		2	7458-7478	19	1862	59829865 - 59831727	1766953		11002	1193763	1193810	47	429792		12002	2281947	2281994	47	170873		2	12029 - 12047	20	2021	2772450 - 2774471	3643
7003	56234275	56234322	47	11460		3	7692-7716	25	1778	61598680 - 61600458			11003	1623602	1623649	47	60861		12003	2452867	2452914	47	31866		3	12049 - 12072	24	2306	2778114 - 2780420	1144
7004	56245782	56245829	47	33481									11004	1684510	1684557	47	37109		12004	2484780	2484827	47	91		4	12073 - 12087	15	1274	2781564 - 2782838	10972
7005	56279310	56279357	47	77		Target sequence		56000000 - 62220000					11005	1721666	1721713	47	45874		12005	2484918	2484965	47	97		5	12088 - 12094	7	848	2793810 - 2794658	147614
7006	56279434	56279481	47	187									11006	1767587	1767634	47	33382		12006	2485062	2485109	47	55469		6	12095 - 12102	8	960	2942272 - 2943232	11751
7007	56279668	56279715	47	65									11007	1801016	1801063	47	63925		12007	2540578	2540625	47	132939		7	12103 - 12119	17	1709	2954983 - 2956692	4049
7008	56279780	56279827	47	3188									11008	1864988	1865035	47			12008	2673564	2673611	47	96175		8	12120 - 12143	24	3078	2960741 - 2963819	4600
7009	56283015	56283062	47	18226															12009	2769786	2769833	47	25		9	12144 - 12162	19	2211	2968263 - 2970474	4049
7010	56301288	56301335	47	50066									Target sequence		1140000 - 1870000				12010	2769858	2769905	47	25		10	12163 - 12186	24	3078	2974523 - 2977601	11448
7011	56351401	56351448	47	49957															12011	2769930	2769977	47	25		11	12188 - 12214	27	3480	2988254 - 2991734	2056
7012	56401405	56401452	47	127996															12012	2770002	2770049	47	166		12	12215 - 12134	20	2360	2993617 - 2995977
7013	56529448	56529495	47	83040															12013	2770215	2770262	47	28
7014	56612535	56612582	47	25170															12014	2770290	2770337	47	97		Target sequence		2120000 - 3020000
7015	56637752	56637799	47	128125															12015	2770434	2770481	47	61
7016	56765924	56765971	47	1577															12016	2770542	2770589	47	25
7017	56767548	56767595	47	13053															12017	2770614	2770661	47	25
7018	56780648	56780695	47	147998															12018	2770686	2770733	47	19
7019	56928693	56928740	47	8506															12019	2770752	2770799	47	31
7020	56937246	56937293	47	18401															12020	2770830	2770877	47	91
7021	56955694	56955741	47	25096															12021	2770968	2771015	47	25
7022	56980837	56980884	47	-17															12022	2771040	2771087	47	94
7023	56980867	56980914	47	43177															12023	2771181	2771228	47	25
7024	57024091	57024138	47	145651															12024	2771253	2771300	47	25
7025	57169789	57169836	47	144774															12025	2771325	2771372	47	25
7026	57314610	57314657	47	64010															12026	2771397	2771444	47	25
7027	57378667	57378714	47	359953															12027	2771469	2771516	47	25
7028	57738667	57738714	47	5341															12028	2771541	2771588	47	862
7029	57744055	57744102	47	204348															12029	2772450	2772497	47	25
7030	57948450	57948497	47	90919															12030	2772522	2772569	47	25
7031	58039416	58039463	47	134605															12031	2772594	2772641	47	25
7032	58174068	58174115	47	54525															12032	2772666	2772713	47	208
7033	58228640	58228687	47	101931															12033	2772921	2772968	47	28
7034	58330618	58330665	47	166759															12034	2772996	2773043	47	97
7035	58497424	58497471	47	135847															12035	2773140	2773187	47	25
7036	58633318	58633365	47	302951															12036	2773212	2773259	47	25
7037	58936316	58936363	47	31549															12037	2773284	2773331	47	25
7038	58967912	58967959	47	6498															12038	2773356	2773403	47	19
7039	58974457	58974504	47	38797															12039	2773422	2773469	47	31
7040	59013301	59013348	47	84629															12040	2773500	2773547	47	91
7041	59097977	59098024	47	1037															12041	2773638	2773685	47	25
7042	59099061	59099108	47	12305															12042	2773710	2773757	47	94
7043	59111413	59111460	47	7981															12043	2773851	2773898	47	25
7044	59119441	59119488	47	109862															12044	2773923	2773970	47	25
7045	59229350	59229397	47	38655															12045	2773995	2774042	47	25
7046	59268052	59268099	47	19864															12046	2774067	2774114	47	25
7047	59287963	59288010	47	48052															12047	2774139	2774186	47	238
7048	59336062	59336109	47	3891															12048	2774424	2774471	47	3643
7049	59340000	59340047	47	8315															12049	2778114	2778161	47	25
7050	59348362	59348409	47	22															12050	2778186	2778233	47	25
7051	59348431	59348478	47	25															12051	2778258	2778305	47	25
7052	59348503	59348550	47	25															12052	2778330	2778377	47	175
7053	59348575	59348622	47	25															12053	2778552	2778599	47	28
7054	59348647	59348694	47	25															12054	2778627	2778674	47	25
7055	59348719	59348766	47	169															12055	2778699	2778746	47	25
7056	59348935	59348982	47	25															12056	2778771	2778818	47	25
7057	59349007	59349054	47	25															12057	2778843	2778890	47	25
7058	59349079	59349126	47	25															12058	2778915	2778962	47	25
7059	59349151	59349198	47	22															12059	2778987	2779034	47	19
7060	59349220	59349267	47	97															12060	2779053	2779100	47	31
7061	59349364	59349411	47	25															12061	2779131	2779178	47	91
7062	59349436	59349483	47	100															12062	2779269	2779316	47	25
7063	59349583	59349630	47	25															12063	2779341	2779388	47	25
7064	59349655	59349702	47	352															12064	2779413	2779460	47	25
7065	59350054	59350101	47	97															12065	2779485	2779532	47	25
7066	59350198	59350245	47	33799															12066	2779557	2779604	47	25
7067	59384044	59384091	47	160709															12067	2779629	2779676	47	25
7068	59544800	59544847	47	32581															12068	2779701	2779748	47	25
7069	59577428	59577475	47	25															12069	2779773	2779820	47	235
7070	59577500	59577547	47	25															12070	2780055	2780102	47	118
7071	59577572	59577619	47	166															12071	2780220	2780267	47	106
7072	59577785	59577832	47	25															12072	2780373	2780420	47	1144
7073	59577857	59577904	47	25															12073	2781564	2781611	47	25
7074	59577929	59577976	47	20973															12074	2781636	2781683	47	25
7075	59598949	59598996	47	26905															12075	2781708	2781755	47	25
7076	59625901	59625948	47	129211															12076	2781780	2781827	47	169
7077	59755159	59755206	47	66448															12077	2781996	2782043	47	31
7078	59821654	59821701	47	7870															12078	2782074	2782121	47	25
7079	59829571	59829618	47	247															12079	2782146	2782193	47	25
7080	59829865	59829912	47	25															12080	2782218	2782265	47	25
7081	59829937	59829984	47	25															12081	2782290	2782337	47	25
7082	59830009	59830056	47	37															12082	2782362	2782409	47	25
7083	59830093	59830140	47	25															12083	2782434	2782481	47	22
7084	59830165	59830212	47	25															12084	2782503	2782550	47	31
7085	59830237	59830284	47	22															12085	2782581	2782628	47	91
7086	59830306	59830353	47	22															12086	2782719	2782766	47	25
7087	59830375	59830422	47	250															12087	2782791	2782838	47	10972
7088	59830672	59830719	47	25															12088	2793810	2793857	47	25
7089	59830744	59830791	47	88															12089	2793882	2793929	47	25
7090	59830879	59830926	47	22															12090	2793954	2794001	47	25
7091	59830948	59830995	47	25															12091	2794026	2794073	47	25
7092	59831020	59831067	47	25															12092	2794098	2794145	47	25
7093	59831092	59831139	47	100															12093	2794170	2794217	47	394
7094	59831239	59831286	47	178															12094	2794611	2794658	47	147614
7095	59831464	59831511	47	25															12095	2942272	2942319	47	86
7096	59831536	59831583	47	25															12096	2942405	2942452	47	25
7097	59831608	59831655	47	25															12097	2942477	2942524	47	25
7098	59831680	59831727	47	306079															12098	2942549	2942596	47	25
7099	60137806	60137853	47	109															12099	2942621	2942668	47	175
7100	60137962	60138009	47	60133															12100	2942843	2942890	47	223
7101	60198142	60198189	47	176584															12101	2943113	2943160	47	25
7102	60374773	60374820	47	27547															12102	2943185	2943232	47	11751
7103	60402367	60402414	47	268118															12103	2954983	2955030	47	28
7104	60670532	60670579	47	26379															12104	2955058	2955105	47	25
7105	60696958	60697005	47	60178															12105	2955130	2955177	47	25
7106	60757183	60757230	47	20332															12106	2955202	2955249	47	25
7107	60777562	60777609	47	190162															12107	2955274	2955321	47	97
7108	60967771	60967818	47	1725															12108	2955418	2955465	47	163
7109	60969543	60969590	47	8021															12109	2955628	2955675	47	31
7110	60977611	60977658	47	77629															12110	2955706	2955753	47	19
7111	61055287	61055334	47	10541															12111	2955772	2955819	47	25
7112	61065875	61065922	47	1055															12112	2955844	2955891	47	25
7113	61066977	61067024	47	6572															12113	2955916	2955963	47	169
7114	61073596	61073643	47	25															12114	2956132	2956179	47	31
7115	61073668	61073715	47	160															12115	2956210	2956257	47	172
7116	61073875	61073922	47	337															12116	2956429	2956476	47	25
7117	61074259	61074306	47	187															12117	2956501	2956548	47	25
7118	61074493	61074540	47	100															12118	2956573	2956620	47	25
7119	61074640	61074687	47	25															12119	2956645	2956692	47	4049
7120	61074712	61074759	47	190															12120	2960741	2960788	47	28
7121	61074949	61074996	47	25															12121	2960816	2960863	47	109
7122	61075021	61075068	47	28															12122	2960972	2961019	47	241
7123	61075096	61075143	47	3715															12123	2961260	2961307	47	25
7124	61078858	61078905	47	107557															12124	2961332	2961379	47	25
7125	61186462	61186509	47	84901															12125	2961404	2961451	47	25
7126	61271410	61271457	47	327223															12126	2961476	2961523	47	25
7127	61598680	61598727	47	25															12127	2961548	2961595	47	25
7128	61598752	61598799	47	25															12128	2961620	2961667	47	97
7129	61598824	61598871	47	28															12129	2961764	2961811	47	25
7130	61598899	61598946	47	25															12130	2961836	2961883	47	94
7131	61598971	61599018	47	25															12131	2961977	2962024	47	31
7132	61599043	61599090	47	25															12132	2962055	2962102	47	19
7133	61599115	61599162	47	25															12133	2962121	2962168	47	25
7134	61599187	61599234	47	25															12134	2962193	2962240	47	25
7135	61599259	61599306	47	25															12135	2962265	2962312	47	167
7136	61599331	61599378	47	25															12136	2962479	2962526	47	31
7137	61599403	61599450	47	25															12137	2962557	2962604	47	157
7138	61599475	61599522	47	25															12138	2962761	2962808	47	25
7139	61599547	61599594	47	25															12139	2962833	2962880	47	25
7140	61599619	61599666	47	25															12140	2962905	2962952	47	25
7141	61599691	61599738	47	25															12141	2962977	2963024	47	546
7142	61599763	61599810	47	25															12142	2963570	2963617	47	155
7143	61599835	61599882	47	25															12143	2963772	2963819	47	4444
7144	61599907	61599954	47	25															12144	2968263	2968310	47	383
7145	61599979	61600026	47	25															12145	2968693	2968740	47	25
7146	61600051	61600098	47	25															12146	2968765	2968812	47	28
7147	61600123	61600170	47	25															12147	2968840	2968887	47	25
7148	61600195	61600242	47	25															12148	2968912	2968959	47	25
7149	61600267	61600314	47	25															12149	2968984	2969031	47	25
7150	61600339	61600386	47	25															12150	2969056	2969103	47	97
7151	61600411	61600458	47	30525															12151	2969200	2969247	47	163
7152	61630983	61631030	47	25058															12152	2969410	2969457	47	31
7153	61656088	61656135	47	49803															12153	2969488	2969535	47	19
7154	61705938	61705985	47	78428															12154	2969554	2969601	47	25
7155	61784413	61784460	47	197140															12155	2969626	2969673	47	25
7156	61981600	61981647	47	88921															12156	2969698	2969745	47	169
7157	62070568	62070615	47	82506															12157	2969914	2969961	47	31
7158	62153121	62153168	47	13757															12158	2969992	2970039	47	172
7159	62166925	62166972	47																12159	2970211	2970258	47	25
																			12160	2970283	2970330	47	25
																			12161	2970355	2970402	47	25
																			12162	2970427	2970474	47	4049
																			12163	2974523	2974570	47	28
																			12164	2974598	2974645	47	109
																			12165	2974754	2974801	47	241
																			12166	2975042	2975089	47	25
																			12167	2975114	2975161	47	25
																			12168	2975186	2975233	47	25
																			12169	2975258	2975305	47	25
																			12170	2975330	2975377	47	25
																			12171	2975402	2975449	47	97
																			12172	2975546	2975593	47	25
																			12173	2975618	2975665	47	94
																			12174	2975759	2975806	47	31
																			12175	2975837	2975884	47	19
																			12176	2975903	2975950	47	25
																			12177	2975975	2976022	47	25
																			12178	2976047	2976094	47	167
																			12179	2976261	2976308	47	31
																			12180	2976339	2976386	47	157
																			12181	2976543	2976590	47	25
																			12182	2976615	2976662	47	25
																			12183	2976687	2976734	47	25
																			12184	2976759	2976806	47	546
																			12185	2977352	2977399	47	155
																			12186	2977554	2977601	47	9888
																			12187	2987489	2987536	47	718
																			12188	2988254	2988301	47	241
																			12189	2988542	2988589	47	25
																			12190	2988614	2988661	47	25
																			12191	2988686	2988733	47	25
																			12192	2988758	2988805	47	25
																			12193	2988830	2988877	47	97
																			12194	2988974	2989021	47	163
																			12195	2989184	2989231	47	31
																			12196	2989262	2989309	47	19
																			12197	2989328	2989375	47	25
																			12198	2989400	2989447	47	25
																			12199	2989472	2989519	47	169
																			12200	2989688	2989735	47	31
																			12201	2989766	2989813	47	172
																			12202	2989985	2990032	47	25
																			12203	2990057	2990104	47	25
																			12204	2990129	2990176	47	25
																			12205	2990201	2990248	47	549
																			12206	2990797	2990844	47	25
																			12207	2990869	2990916	47	100
																			12208	2991016	2991063	47	91
																			12209	2991154	2991201	47	31
																			12210	2991232	2991279	47	19
																			12211	2991298	2991345	47	97
																			12212	2991442	2991489	47	25
																			12213	2991514	2991561	47	126
																			12214	2991687	2991734	47	1883
																			12215	2993617	2993664	47	106
																			12216	2993770	2993817	47	109
																			12217	2993926	2993973	47	238
																			12218	2994211	2994258	47	25
																			12219	2994283	2994330	47	25
																			12220	2994355	2994402	47	25
																			12221	2994427	2994474	47	25
																			12222	2994499	2994546	47	25
																			12223	2994571	2994618	47	97
																			12224	2994715	2994762	47	163
																			12225	2994925	2994972	47	31
																			12226	2995003	2995050	47	19
																			12227	2995069	2995116	47	25
																			12228	2995141	2995188	47	25
																			12229	2995213	2995260	47	244
																			12230	2995504	2995551	47	163
																			12231	2995714	2995761	47	25
																			12232	2995786	2995833	47	25
																			12233	2995858	2995905	47	25
																			12234	2995930	2995977	47

## Sheet: fimo_betasheets
##gff-version 3
SL2.30ch07_56000000_62220000_1	fimo	sequence_feature	56038229	56038276	2.53e-09	+	0	ID=HMM_SL2.30ch07_56000000_62220000_1_1;Name=HMM_SL2.30ch07_56000000_62220000_1_1;Score=2.53e-09;Sequence=LEVLVLSNCNLTGEIT
SL2.30ch07_56000000_62220000_1	fimo	sequence_feature	59577500	59577547	2.78e-09	+	0	ID=HMM_SL2.30ch07_56000000_62220000_1_2;Name=HMM_SL2.30ch07_56000000_62220000_1_2;Score=2.78e-09;Sequence=LHELDLSNNRFVGPFP
SL2.30ch07_56000000_62220000_1	fimo	sequence_feature	56279780	56279827	3.68e-09	+	0	ID=HMM_SL2.30ch07_56000000_62220000_1_3;Name=HMM_SL2.30ch07_56000000_62220000_1_3;Score=3.68e-09;Sequence=YLRLDLSSNHLVGEIL
SL2.30ch07_56000000_62220000_1	fimo	sequence_feature	59577857	59577904	1.62e-08	+	0	ID=HMM_SL2.30ch07_56000000_62220000_1_4;Name=HMM_SL2.30ch07_56000000_62220000_1_4;Score=1.62e-08;Sequence=LKVLDVSNNKLAGTIP
SL2.30ch07_56000000_62220000_1	fimo	sequence_feature	61065875	61065922	1.68e-08	+	0	ID=HMM_SL2.30ch07_56000000_62220000_1_5;Name=HMM_SL2.30ch07_56000000_62220000_1_5;Score=1.68e-08;Sequence=LILSVLSSNKLTGALP
SL2.30ch07_56000000_62220000_1	fimo	sequence_feature	59577929	59577976	2.37e-08	+	0	ID=HMM_SL2.30ch07_56000000_62220000_1_6;Name=HMM_SL2.30ch07_56000000_62220000_1_6;Score=2.37e-08;Sequence=LELLNLAHNMFTGTVP
SL2.30ch07_56000000_62220000_1	fimo	sequence_feature	59544800	59544847	5.35e-08	+	0	ID=HMM_SL2.30ch07_56000000_62220000_1_7;Name=HMM_SL2.30ch07_56000000_62220000_1_7;Score=5.35e-08;Sequence=LHNLDLLWNHLGLRIV
SL2.30ch07_56000000_62220000_1	fimo	sequence_feature	58967912	58967959	8.79e-07	+	0	ID=HMM_SL2.30ch07_56000000_62220000_1_8;Name=HMM_SL2.30ch07_56000000_62220000_1_8;Score=8.79e-07;Sequence=LRVLDLSYNRLVKIGH
SL2.30ch07_56000000_62220000_1	fimo	sequence_feature	59577572	59577619	8.79e-07	+	0	ID=HMM_SL2.30ch07_56000000_62220000_1_9;Name=HMM_SL2.30ch07_56000000_62220000_1_9;Score=8.79e-07;Sequence=LKYLDLRYNEFEGPLP
SL2.30ch07_56000000_62220000_1	fimo	sequence_feature	59577428	59577475	1.89e-06	+	0	ID=HMM_SL2.30ch07_56000000_62220000_1_10;Name=HMM_SL2.30ch07_56000000_62220000_1_10;Score=1.89e-06;Sequence=LALLHLNSNRFCGILP
SL2.30ch07_56000000_62220000_1	fimo	sequence_feature	60670532	60670579	2.39e-06	+	0	ID=HMM_SL2.30ch07_56000000_62220000_1_11;Name=HMM_SL2.30ch07_56000000_62220000_1_11;Score=2.39e-06;Sequence=LAQTNLTSLSLVPAIP
SL2.30ch07_56000000_62220000_1	fimo	sequence_feature	59577785	59577832	2.75e-06	+	0	ID=HMM_SL2.30ch07_56000000_62220000_1_12;Name=HMM_SL2.30ch07_56000000_62220000_1_12;Score=2.75e-06;Sequence=LEELLLINTSLSGCLP
SL2.30ch07_56000000_62220000_1	fimo	sequence_feature	58936316	58936363	3.51e-06	+	0	ID=HMM_SL2.30ch07_56000000_62220000_1_13;Name=HMM_SL2.30ch07_56000000_62220000_1_13;Score=3.51e-06;Sequence=LIVLNTSFNSLSCSSF
SL2.30ch07_56000000_62220000_1	fimo	sequence_feature	59229350	59229397	3.51e-06	+	0	ID=HMM_SL2.30ch07_56000000_62220000_1_14;Name=HMM_SL2.30ch07_56000000_62220000_1_14;Score=3.51e-06;Sequence=LEFINQIFNSLISSIH
SL2.30ch07_56000000_62220000_1	fimo	sequence_feature	56765924	56765971	3.89e-06	+	0	ID=HMM_SL2.30ch07_56000000_62220000_1_15;Name=HMM_SL2.30ch07_56000000_62220000_1_15;Score=3.89e-06;Sequence=NVLLHLSSLSLLLLIP
SL2.30ch07_56000000_62220000_1	fimo	sequence_feature	56780648	56780695	7.6e-06	+	0	ID=HMM_SL2.30ch07_56000000_62220000_1_16;Name=HMM_SL2.30ch07_56000000_62220000_1_16;Score=7.6e-06;Sequence=AEKLNGNSNSLQAEIQ
SL2.30ch07_56000000_62220000_1	fimo	sequence_feature	59097977	59098024	8.61e-06	+	0	ID=HMM_SL2.30ch07_56000000_62220000_1_17;Name=HMM_SL2.30ch07_56000000_62220000_1_17;Score=8.61e-06;Sequence=ASILYLSSDVFTGKIS
SL2.30ch07_56000000_62220000_1	fimo	sequence_feature	58228640	58228687	8.87e-06	+	0	ID=HMM_SL2.30ch07_56000000_62220000_1_18;Name=HMM_SL2.30ch07_56000000_62220000_1_18;Score=8.87e-06;Sequence=SGFLDLIDLKLVNPIW
SL2.30ch07_56000000_62220000_1	fimo	sequence_feature	56038304	56038351	1e-05	+	0	ID=HMM_SL2.30ch07_56000000_62220000_1_19;Name=HMM_SL2.30ch07_56000000_62220000_1_19;Score=1e-05;Sequence=LRILNLGFNKKIITAE
SL2.30ch07_56000000_62220000_1	fimo	sequence_feature	56637752	56637799	1e-05	+	0	ID=HMM_SL2.30ch07_56000000_62220000_1_20;Name=HMM_SL2.30ch07_56000000_62220000_1_20;Score=1e-05;Sequence=YELLVLSQCKLRRSIC
SL2.30ch07_56000000_62220000_1	fimo	sequence_feature	56988059	56988106	1.71e-05	+	0	ID=HMM_SL2.30ch07_56000000_62220000_1_21;Name=HMM_SL2.30ch07_56000000_62220000_1_21;Score=1.71e-05;Sequence=YQPLDRSFNVLNKMIY
SL2.30ch07_56000000_62220000_1	fimo	sequence_feature	60380060	60380107	1.71e-05	+	0	ID=HMM_SL2.30ch07_56000000_62220000_1_22;Name=HMM_SL2.30ch07_56000000_62220000_1_22;Score=1.71e-05;Sequence=LLILYPSTLSFRADIP
SL2.30ch07_56000000_62220000_1	fimo	sequence_feature	59010704	59010751	1.86e-05	+	0	ID=HMM_SL2.30ch07_56000000_62220000_1_23;Name=HMM_SL2.30ch07_56000000_62220000_1_23;Score=1.86e-05;Sequence=LTDLSPFSPSLTCLSP
SL2.30ch07_56000000_62220000_1	fimo	sequence_feature	57499040	57499087	1.91e-05	+	0	ID=HMM_SL2.30ch07_56000000_62220000_1_24;Name=HMM_SL2.30ch07_56000000_62220000_1_24;Score=1.91e-05;Sequence=KIFSNLSQQSLNGKRG
SL2.30ch07_56000000_62220000_1	fimo	sequence_feature	57727328	57727375	1.91e-05	+	0	ID=HMM_SL2.30ch07_56000000_62220000_1_25;Name=HMM_SL2.30ch07_56000000_62220000_1_25;Score=1.91e-05;Sequence=YILLNLNSNLLIFAEE
SL2.30ch07_56000000_62220000_1	fimo	sequence_feature	59046314	59046361	2.02e-05	+	0	ID=HMM_SL2.30ch07_56000000_62220000_1_26;Name=HMM_SL2.30ch07_56000000_62220000_1_26;Score=2.02e-05;Sequence=LLLRSLNENSVSVTIH
SL2.30ch07_56000000_62220000_1	fimo	sequence_feature	58967846	58967893	2.08e-05	+	0	ID=HMM_SL2.30ch07_56000000_62220000_1_27;Name=HMM_SL2.30ch07_56000000_62220000_1_27;Score=2.08e-05;Sequence=LHILNLSRNSISVIEG
SL2.30ch07_56000000_62220000_1	fimo	sequence_feature	60669383	60669430	2.19e-05	+	0	ID=HMM_SL2.30ch07_56000000_62220000_1_28;Name=HMM_SL2.30ch07_56000000_62220000_1_28;Score=2.19e-05;Sequence=LSLLQSGGNLRTHHIL
SL2.30ch07_56000000_62220000_1	fimo	sequence_feature	59980988	59981035	2.32e-05	+	0	ID=HMM_SL2.30ch07_56000000_62220000_1_29;Name=HMM_SL2.30ch07_56000000_62220000_1_29;Score=2.32e-05;Sequence=LVILGLSWHQKTVMIQ
SL2.30ch07_56000000_62220000_1	fimo	sequence_feature	61680776	61680823	2.38e-05	+	0	ID=HMM_SL2.30ch07_56000000_62220000_1_30;Name=HMM_SL2.30ch07_56000000_62220000_1_30;Score=2.38e-05;Sequence=LFFLSHSTNSSTYPLP
SL2.30ch07_56000000_62220000_1	fimo	sequence_feature	60234200	60234247	2.67e-05	+	0	ID=HMM_SL2.30ch07_56000000_62220000_1_31;Name=HMM_SL2.30ch07_56000000_62220000_1_31;Score=2.67e-05;Sequence=EWNLQLSYMTLFMMIW
SL2.30ch07_56000000_62220000_1	fimo	sequence_feature	60905255	60905302	2.67e-05	+	0	ID=HMM_SL2.30ch07_56000000_62220000_1_32;Name=HMM_SL2.30ch07_56000000_62220000_1_32;Score=2.67e-05;Sequence=LNLLNLSSDSLDLSSQ
SL2.30ch07_56000000_62220000_1	fimo	sequence_feature	58877345	58877392	2.82e-05	+	0	ID=HMM_SL2.30ch07_56000000_62220000_1_33;Name=HMM_SL2.30ch07_56000000_62220000_1_33;Score=2.82e-05;Sequence=LWYLYLSYGVIICMEC
SL2.30ch07_56000000_62220000_1	fimo	sequence_feature	60089369	60089416	3.16e-05	+	0	ID=HMM_SL2.30ch07_56000000_62220000_1_34;Name=HMM_SL2.30ch07_56000000_62220000_1_34;Score=3.16e-05;Sequence=VMLLYIYYNKLRGHII
SL2.30ch07_56000000_62220000_1	fimo	sequence_feature	57456350	57456397	3.26e-05	+	0	ID=HMM_SL2.30ch07_56000000_62220000_1_35;Name=HMM_SL2.30ch07_56000000_62220000_1_35;Score=3.26e-05;Sequence=HVTYNNYNNNLSNLIP
SL2.30ch07_56000000_62220000_1	fimo	sequence_feature	60441881	60441928	3.26e-05	+	0	ID=HMM_SL2.30ch07_56000000_62220000_1_36;Name=HMM_SL2.30ch07_56000000_62220000_1_36;Score=3.26e-05;Sequence=STILVLSDNILINPSH
SL2.30ch07_56000000_62220000_1	fimo	sequence_feature	57643652	57643699	3.35e-05	+	0	ID=HMM_SL2.30ch07_56000000_62220000_1_37;Name=HMM_SL2.30ch07_56000000_62220000_1_37;Score=3.35e-05;Sequence=HNNLNISSLNLKFKIF
SL2.30ch07_56000000_62220000_1	fimo	sequence_feature	61938335	61938382	3.45e-05	+	0	ID=HMM_SL2.30ch07_56000000_62220000_1_38;Name=HMM_SL2.30ch07_56000000_62220000_1_38;Score=3.45e-05;Sequence=MGILHYICLLLTGNIC
SL2.30ch07_56000000_62220000_1	fimo	sequence_feature	60290867	60290914	3.66e-05	+	0	ID=HMM_SL2.30ch07_56000000_62220000_1_39;Name=HMM_SL2.30ch07_56000000_62220000_1_39;Score=3.66e-05;Sequence=LFRLSLSYTKVVTFIP
SL2.30ch07_56000000_62220000_1	fimo	sequence_feature	58525658	58525705	4e-05	+	0	ID=HMM_SL2.30ch07_56000000_62220000_1_40;Name=HMM_SL2.30ch07_56000000_62220000_1_40;Score=4e-05;Sequence=LCRLSLASLLLSILLP
SL2.30ch07_56000000_62220000_1	fimo	sequence_feature	58529015	58529062	4.25e-05	+	0	ID=HMM_SL2.30ch07_56000000_62220000_1_41;Name=HMM_SL2.30ch07_56000000_62220000_1_41;Score=4.25e-05;Sequence=LIHIVLSCCSCQLIIP
SL2.30ch07_56000000_62220000_1	fimo	sequence_feature	60996128	60996175	4.25e-05	+	0	ID=HMM_SL2.30ch07_56000000_62220000_1_42;Name=HMM_SL2.30ch07_56000000_62220000_1_42;Score=4.25e-05;Sequence=INYHQLFNNMLTETIS
SL2.30ch07_56000000_62220000_1	fimo	sequence_feature	60019076	60019123	4.38e-05	+	0	ID=HMM_SL2.30ch07_56000000_62220000_1_43;Name=HMM_SL2.30ch07_56000000_62220000_1_43;Score=4.38e-05;Sequence=LEVLDLSFSEHGIVGP
SL2.30ch07_56000000_62220000_1	fimo	sequence_feature	59643773	59643820	4.79e-05	+	0	ID=HMM_SL2.30ch07_56000000_62220000_1_44;Name=HMM_SL2.30ch07_56000000_62220000_1_44;Score=4.79e-05;Sequence=LQDLTISHQNTRKLIP
SL2.30ch07_56000000_62220000_1	fimo	sequence_feature	61569941	61569988	4.79e-05	+	0	ID=HMM_SL2.30ch07_56000000_62220000_1_45;Name=HMM_SL2.30ch07_56000000_62220000_1_45;Score=4.79e-05;Sequence=ATHNNIFHSVLSGLIN
SL2.30ch07_56000000_62220000_1	fimo	sequence_feature	59728400	59728447	4.94e-05	+	0	ID=HMM_SL2.30ch07_56000000_62220000_1_46;Name=HMM_SL2.30ch07_56000000_62220000_1_46;Score=4.94e-05;Sequence=LTLRQLSWSLLICHLR
SL2.30ch07_56000000_62220000_1	fimo	sequence_feature	60041951	60041998	4.94e-05	+	0	ID=HMM_SL2.30ch07_56000000_62220000_1_47;Name=HMM_SL2.30ch07_56000000_62220000_1_47;Score=4.94e-05;Sequence=LKVLDLSFYEHGTDHP
SL2.30ch07_56000000_62220000_1	fimo	sequence_feature	57109802	57109849	5.09e-05	+	0	ID=HMM_SL2.30ch07_56000000_62220000_1_48;Name=HMM_SL2.30ch07_56000000_62220000_1_48;Score=5.09e-05;Sequence=KTKLHLKIILLIYRIP
SL2.30ch07_56000000_62220000_1	fimo	sequence_feature	60033962	60034009	5.09e-05	+	0	ID=HMM_SL2.30ch07_56000000_62220000_1_49;Name=HMM_SL2.30ch07_56000000_62220000_1_49;Score=5.09e-05;Sequence=KETLFLGSWSLNIPAP
SL2.30ch07_56000000_62220000_1	fimo	sequence_feature	61496147	61496194	5.09e-05	+	0	ID=HMM_SL2.30ch07_56000000_62220000_1_50;Name=HMM_SL2.30ch07_56000000_62220000_1_50;Score=5.09e-05;Sequence=LNSLKLNYFTLMIRIL
SL2.30ch07_56000000_62220000_1	fimo	sequence_feature	62204015	62204062	5.09e-05	+	0	ID=HMM_SL2.30ch07_56000000_62220000_1_51;Name=HMM_SL2.30ch07_56000000_62220000_1_51;Score=5.09e-05;Sequence=PRRLNLNPKHLNNAIK
SL2.30ch07_56000000_62220000_1	fimo	sequence_feature	58974767	58974814	5.41e-05	+	0	ID=HMM_SL2.30ch07_56000000_62220000_1_52;Name=HMM_SL2.30ch07_56000000_62220000_1_52;Score=5.41e-05;Sequence=LLKVNQSYFDTIGPHP
SL2.30ch07_56000000_62220000_1	fimo	sequence_feature	60917588	60917635	5.41e-05	+	0	ID=HMM_SL2.30ch07_56000000_62220000_1_53;Name=HMM_SL2.30ch07_56000000_62220000_1_53;Score=5.41e-05;Sequence=LEILVLSGCSELRTFP
SL2.30ch07_56000000_62220000_1	fimo	sequence_feature	59537549	59537596	5.75e-05	+	0	ID=HMM_SL2.30ch07_56000000_62220000_1_54;Name=HMM_SL2.30ch07_56000000_62220000_1_54;Score=5.75e-05;Sequence=LRYGYLDYEELRGVIQ
SL2.30ch07_56000000_62220000_1	fimo	sequence_feature	60522047	60522094	5.75e-05	+	0	ID=HMM_SL2.30ch07_56000000_62220000_1_55;Name=HMM_SL2.30ch07_56000000_62220000_1_55;Score=5.75e-05;Sequence=LISNIFNRNRLSSNIP
SL2.30ch07_56000000_62220000_1	fimo	sequence_feature	57832493	57832540	6.11e-05	+	0	ID=HMM_SL2.30ch07_56000000_62220000_1_56;Name=HMM_SL2.30ch07_56000000_62220000_1_56;Score=6.11e-05;Sequence=VHELFLSSLQLMGDPI
SL2.30ch07_56000000_62220000_1	fimo	sequence_feature	58913267	58913314	6.11e-05	+	0	ID=HMM_SL2.30ch07_56000000_62220000_1_57;Name=HMM_SL2.30ch07_56000000_62220000_1_57;Score=6.11e-05;Sequence=LRLFSVSTNKTYGPIS
SL2.30ch07_56000000_62220000_1	fimo	sequence_feature	57856298	57856345	6.3e-05	+	0	ID=HMM_SL2.30ch07_56000000_62220000_1_58;Name=HMM_SL2.30ch07_56000000_62220000_1_58;Score=6.3e-05;Sequence=TSFLDLIQYSLNVRYT
SL2.30ch07_56000000_62220000_1	fimo	sequence_feature	59941991	59942038	6.49e-05	+	0	ID=HMM_SL2.30ch07_56000000_62220000_1_59;Name=HMM_SL2.30ch07_56000000_62220000_1_59;Score=6.49e-05;Sequence=LARLSPPSTNLSCHIY
SL2.30ch07_56000000_62220000_1	fimo	sequence_feature	61972994	61973041	6.49e-05	+	0	ID=HMM_SL2.30ch07_56000000_62220000_1_60;Name=HMM_SL2.30ch07_56000000_62220000_1_60;Score=6.49e-05;Sequence=LARLSPPSLNLSFHIY
SL2.30ch07_56000000_62220000_1	fimo	sequence_feature	62009867	62009914	6.49e-05	+	0	ID=HMM_SL2.30ch07_56000000_62220000_1_61;Name=HMM_SL2.30ch07_56000000_62220000_1_61;Score=6.49e-05;Sequence=LSGLNESYEQAKRQIL
SL2.30ch07_56000000_62220000_1	fimo	sequence_feature	58444262	58444309	6.69e-05	+	0	ID=HMM_SL2.30ch07_56000000_62220000_1_62;Name=HMM_SL2.30ch07_56000000_62220000_1_62;Score=6.69e-05;Sequence=LSFIVITNNNLGGKAD
SL2.30ch07_56000000_62220000_1	fimo	sequence_feature	59551118	59551165	6.69e-05	+	0	ID=HMM_SL2.30ch07_56000000_62220000_1_63;Name=HMM_SL2.30ch07_56000000_62220000_1_63;Score=6.69e-05;Sequence=LFHFFLICLLLHGRIT
SL2.30ch07_56000000_62220000_1	fimo	sequence_feature	62126474	62126521	6.69e-05	+	0	ID=HMM_SL2.30ch07_56000000_62220000_1_64;Name=HMM_SL2.30ch07_56000000_62220000_1_64;Score=6.69e-05;Sequence=LRTCHLPQTSLVGSYW
SL2.30ch07_56000000_62220000_1	fimo	sequence_feature	58352408	58352455	6.89e-05	+	0	ID=HMM_SL2.30ch07_56000000_62220000_1_65;Name=HMM_SL2.30ch07_56000000_62220000_1_65;Score=6.89e-05;Sequence=NQQLKKIDNNLKPKIK
SL2.30ch07_56000000_62220000_1	fimo	sequence_feature	58962263	58962310	6.89e-05	+	0	ID=HMM_SL2.30ch07_56000000_62220000_1_66;Name=HMM_SL2.30ch07_56000000_62220000_1_66;Score=6.89e-05;Sequence=KVILPSFHNNLSLLIL
SL2.30ch07_56000000_62220000_1	fimo	sequence_feature	60388187	60388234	6.89e-05	+	0	ID=HMM_SL2.30ch07_56000000_62220000_1_67;Name=HMM_SL2.30ch07_56000000_62220000_1_67;Score=6.89e-05;Sequence=LVVLVVSQLHTGDKTP
SL2.30ch07_56000000_62220000_1	fimo	sequence_feature	60651713	60651760	6.89e-05	+	0	ID=HMM_SL2.30ch07_56000000_62220000_1_68;Name=HMM_SL2.30ch07_56000000_62220000_1_68;Score=6.89e-05;Sequence=YESLDLFFNDLSFSVD
SL2.30ch07_56000000_62220000_1	fimo	sequence_feature	61383578	61383625	6.89e-05	+	0	ID=HMM_SL2.30ch07_56000000_62220000_1_69;Name=HMM_SL2.30ch07_56000000_62220000_1_69;Score=6.89e-05;Sequence=TLFLQVSCLNKQGTIG
SL2.30ch07_56000000_62220000_1	fimo	sequence_feature	58176860	58176907	7.11e-05	+	0	ID=HMM_SL2.30ch07_56000000_62220000_1_70;Name=HMM_SL2.30ch07_56000000_62220000_1_70;Score=7.11e-05;Sequence=GWLLYLFSDKLHFFIF
SL2.30ch07_56000000_62220000_1	fimo	sequence_feature	60269006	60269053	7.11e-05	+	0	ID=HMM_SL2.30ch07_56000000_62220000_1_71;Name=HMM_SL2.30ch07_56000000_62220000_1_71;Score=7.11e-05;Sequence=LRELDLGINFSVGSRG
SL2.30ch07_56000000_62220000_1	fimo	sequence_feature	61921316	61921363	7.11e-05	+	0	ID=HMM_SL2.30ch07_56000000_62220000_1_72;Name=HMM_SL2.30ch07_56000000_62220000_1_72;Score=7.11e-05;Sequence=CSQLQLSSNSCNKKYL
SL2.30ch07_56000000_62220000_1	fimo	sequence_feature	57350780	57350827	7.32e-05	+	0	ID=HMM_SL2.30ch07_56000000_62220000_1_73;Name=HMM_SL2.30ch07_56000000_62220000_1_73;Score=7.32e-05;Sequence=LCTQTLIQNLLHISIF
SL2.30ch07_56000000_62220000_1	fimo	sequence_feature	58248515	58248562	7.32e-05	+	0	ID=HMM_SL2.30ch07_56000000_62220000_1_74;Name=HMM_SL2.30ch07_56000000_62220000_1_74;Score=7.32e-05;Sequence=LGRLVLIFWLFVVLII
SL2.30ch07_56000000_62220000_1	fimo	sequence_feature	59094833	59094880	7.32e-05	+	0	ID=HMM_SL2.30ch07_56000000_62220000_1_75;Name=HMM_SL2.30ch07_56000000_62220000_1_75;Score=7.32e-05;Sequence=FIFSNNNTNQLLCLIP
SL2.30ch07_56000000_62220000_1	fimo	sequence_feature	62075507	62075554	7.54e-05	+	0	ID=HMM_SL2.30ch07_56000000_62220000_1_76;Name=HMM_SL2.30ch07_56000000_62220000_1_76;Score=7.54e-05;Sequence=FNVLHLNFLHLILMHL
SL2.30ch07_56000000_62220000_1	fimo	sequence_feature	57593036	57593083	7.77e-05	+	0	ID=HMM_SL2.30ch07_56000000_62220000_1_77;Name=HMM_SL2.30ch07_56000000_62220000_1_77;Score=7.77e-05;Sequence=LQLLQLLRKSLISPSY
SL2.30ch07_56000000_62220000_1	fimo	sequence_feature	57719126	57719173	8.01e-05	+	0	ID=HMM_SL2.30ch07_56000000_62220000_1_78;Name=HMM_SL2.30ch07_56000000_62220000_1_78;Score=8.01e-05;Sequence=LKALFKSQLQLCDRIP
SL2.30ch07_56000000_62220000_1	fimo	sequence_feature	59414723	59414770	8.01e-05	+	0	ID=HMM_SL2.30ch07_56000000_62220000_1_79;Name=HMM_SL2.30ch07_56000000_62220000_1_79;Score=8.01e-05;Sequence=LSELLRSDISLKKNIL
SL2.30ch07_56000000_62220000_1	fimo	sequence_feature	60488936	60488983	8.01e-05	+	0	ID=HMM_SL2.30ch07_56000000_62220000_1_80;Name=HMM_SL2.30ch07_56000000_62220000_1_80;Score=8.01e-05;Sequence=LFKLSLFNPHLICPYF
SL2.30ch07_56000000_62220000_1	fimo	sequence_feature	61881632	61881679	8.01e-05	+	0	ID=HMM_SL2.30ch07_56000000_62220000_1_81;Name=HMM_SL2.30ch07_56000000_62220000_1_81;Score=8.01e-05;Sequence=LLVFDLSFSSLSVQFR
SL2.30ch07_56000000_62220000_1	fimo	sequence_feature	57163811	57163858	8.25e-05	+	0	ID=HMM_SL2.30ch07_56000000_62220000_1_82;Name=HMM_SL2.30ch07_56000000_62220000_1_82;Score=8.25e-05;Sequence=LQLLDFLNNVDSGLRC
SL2.30ch07_56000000_62220000_1	fimo	sequence_feature	57856121	57856168	8.25e-05	+	0	ID=HMM_SL2.30ch07_56000000_62220000_1_83;Name=HMM_SL2.30ch07_56000000_62220000_1_83;Score=8.25e-05;Sequence=LSLVNLIDVALNSLIF
SL2.30ch07_56000000_62220000_1	fimo	sequence_feature	58353572	58353619	8.25e-05	+	0	ID=HMM_SL2.30ch07_56000000_62220000_1_84;Name=HMM_SL2.30ch07_56000000_62220000_1_84;Score=8.25e-05;Sequence=LSPLSLSQISLVTLAS
SL2.30ch07_56000000_62220000_1	fimo	sequence_feature	59305094	59305141	8.25e-05	+	0	ID=HMM_SL2.30ch07_56000000_62220000_1_85;Name=HMM_SL2.30ch07_56000000_62220000_1_85;Score=8.25e-05;Sequence=LNFLLHIDPNLMGASV
SL2.30ch07_56000000_62220000_1	fimo	sequence_feature	61608707	61608754	8.25e-05	+	0	ID=HMM_SL2.30ch07_56000000_62220000_1_86;Name=HMM_SL2.30ch07_56000000_62220000_1_86;Score=8.25e-05;Sequence=LNFNNLIRTRFSAQIY
SL2.30ch07_56000000_62220000_1	fimo	sequence_feature	57046127	57046174	8.49e-05	+	0	ID=HMM_SL2.30ch07_56000000_62220000_1_87;Name=HMM_SL2.30ch07_56000000_62220000_1_87;Score=8.49e-05;Sequence=IRKLFGSSNTLSLAIR
SL2.30ch07_56000000_62220000_1	fimo	sequence_feature	57387878	57387925	8.49e-05	+	0	ID=HMM_SL2.30ch07_56000000_62220000_1_88;Name=HMM_SL2.30ch07_56000000_62220000_1_88;Score=8.49e-05;Sequence=KRKLNLKERRLRKTYP
SL2.30ch07_56000000_62220000_1	fimo	sequence_feature	56540285	56540332	8.75e-05	+	0	ID=HMM_SL2.30ch07_56000000_62220000_1_89;Name=HMM_SL2.30ch07_56000000_62220000_1_89;Score=8.75e-05;Sequence=DARMNLSSPTSIGSIR
SL2.30ch07_56000000_62220000_1	fimo	sequence_feature	57272930	57272977	9.01e-05	+	0	ID=HMM_SL2.30ch07_56000000_62220000_1_90;Name=HMM_SL2.30ch07_56000000_62220000_1_90;Score=9.01e-05;Sequence=LGVTHNFYNVSHIMCP
SL2.30ch07_56000000_62220000_1	fimo	sequence_feature	59394983	59395030	9.01e-05	+	0	ID=HMM_SL2.30ch07_56000000_62220000_1_91;Name=HMM_SL2.30ch07_56000000_62220000_1_91;Score=9.01e-05;Sequence=LNNLNLDFKEKTGSTL
SL2.30ch07_56000000_62220000_1	fimo	sequence_feature	56892749	56892796	9.27e-05	+	0	ID=HMM_SL2.30ch07_56000000_62220000_1_92;Name=HMM_SL2.30ch07_56000000_62220000_1_92;Score=9.27e-05;Sequence=LIIQELSSSRTRGKIM
SL2.30ch07_56000000_62220000_1	fimo	sequence_feature	57504515	57504562	9.27e-05	+	0	ID=HMM_SL2.30ch07_56000000_62220000_1_93;Name=HMM_SL2.30ch07_56000000_62220000_1_93;Score=9.27e-05;Sequence=LRICQQSSSSLNGKKD
SL2.30ch07_56000000_62220000_1	fimo	sequence_feature	58409609	58409656	9.27e-05	+	0	ID=HMM_SL2.30ch07_56000000_62220000_1_94;Name=HMM_SL2.30ch07_56000000_62220000_1_94;Score=9.27e-05;Sequence=LTFLVGLFKLLMCDIM
SL2.30ch07_56000000_62220000_1	fimo	sequence_feature	62156300	62156347	9.27e-05	+	0	ID=HMM_SL2.30ch07_56000000_62220000_1_95;Name=HMM_SL2.30ch07_56000000_62220000_1_95;Score=9.27e-05;Sequence=AAVLLLIRNRIKGKFK
SL2.30ch07_56000000_62220000_1	fimo	sequence_feature	56111480	56111527	9.55e-05	+	0	ID=HMM_SL2.30ch07_56000000_62220000_1_96;Name=HMM_SL2.30ch07_56000000_62220000_1_96;Score=9.55e-05;Sequence=LQNLHLSSNDGVLVFR
SL2.30ch07_56000000_62220000_1	fimo	sequence_feature	56247965	56248012	9.55e-05	+	0	ID=HMM_SL2.30ch07_56000000_62220000_1_97;Name=HMM_SL2.30ch07_56000000_62220000_1_97;Score=9.55e-05;Sequence=LLFLFLIFNNQTISYS
SL2.30ch07_56000000_62220000_1	fimo	sequence_feature	56954156	56954203	9.55e-05	+	0	ID=HMM_SL2.30ch07_56000000_62220000_1_98;Name=HMM_SL2.30ch07_56000000_62220000_1_98;Score=9.55e-05;Sequence=LWLLIAFDTLLHSAIS
SL2.30ch07_56000000_62220000_1	fimo	sequence_feature	57314435	57314482	9.55e-05	+	0	ID=HMM_SL2.30ch07_56000000_62220000_1_99;Name=HMM_SL2.30ch07_56000000_62220000_1_99;Score=9.55e-05;Sequence=LVFLYLEYSSVVNLKP
SL2.30ch07_56000000_62220000_1	fimo	sequence_feature	58730921	58730968	9.55e-05	+	0	ID=HMM_SL2.30ch07_56000000_62220000_1_100;Name=HMM_SL2.30ch07_56000000_62220000_1_100;Score=9.55e-05;Sequence=FYLLHSASQELNGMIL
SL2.30ch07_56000000_62220000_1	fimo	sequence_feature	57205502	57205549	9.82e-05	+	0	ID=HMM_SL2.30ch07_56000000_62220000_1_101;Name=HMM_SL2.30ch07_56000000_62220000_1_101;Score=9.82e-05;Sequence=LEQSSLDNSKLIGMTS
SL2.30ch07_56000000_62220000_1	fimo	sequence_feature	60019232	60019279	9.82e-05	+	0	ID=HMM_SL2.30ch07_56000000_62220000_1_102;Name=HMM_SL2.30ch07_56000000_62220000_1_102;Score=9.82e-05;Sequence=LKTLYLNKVVLMGQSI
SL2.30ch07_56000000_62220000_1	fimo	sequence_feature	61122854	61122901	9.82e-05	+	0	ID=HMM_SL2.30ch07_56000000_62220000_1_103;Name=HMM_SL2.30ch07_56000000_62220000_1_103;Score=9.82e-05;Sequence=LHFLDQNTFRNINRLP
SL2.30ch07_56000000_62220000_1	fimo	sequence_feature	61132472	61132519	9.82e-05	+	0	ID=HMM_SL2.30ch07_56000000_62220000_1_104;Name=HMM_SL2.30ch07_56000000_62220000_1_104;Score=9.82e-05;Sequence=LVALNMSCEKLKLKCY
SL2.30ch07_56000000_62220000_1	fimo	sequence_feature	61639556	61639603	9.82e-05	+	0	ID=HMM_SL2.30ch07_56000000_62220000_1_105;Name=HMM_SL2.30ch07_56000000_62220000_1_105;Score=9.82e-05;Sequence=LEFLSQERNKARDPHP
SL2.30ch07_56000000_62220000_2	fimo	sequence_feature	61066977	61067024	4.66e-10	+	1	ID=HMM_SL2.30ch07_56000000_62220000_2_106;Name=HMM_SL2.30ch07_56000000_62220000_2_106;Score=4.66e-10;Sequence=FEFRDLSFNSLSGEIP
SL2.30ch07_56000000_62220000_2	fimo	sequence_feature	56283015	56283062	2.07e-08	+	1	ID=HMM_SL2.30ch07_56000000_62220000_2_107;Name=HMM_SL2.30ch07_56000000_62220000_2_107;Score=2.07e-08;Sequence=LTALNLSRNSIVGGIC
SL2.30ch07_56000000_62220000_2	fimo	sequence_feature	56279310	56279357	5.35e-08	+	1	ID=HMM_SL2.30ch07_56000000_62220000_2_108;Name=HMM_SL2.30ch07_56000000_62220000_2_108;Score=5.35e-08;Sequence=LRSFNLHGNKLKGKIP
SL2.30ch07_56000000_62220000_2	fimo	sequence_feature	61705938	61705985	1.09e-06	+	1	ID=HMM_SL2.30ch07_56000000_62220000_2_109;Name=HMM_SL2.30ch07_56000000_62220000_2_109;Score=1.09e-06;Sequence=LTFLVLISNTLNPLVK
SL2.30ch07_56000000_62220000_2	fimo	sequence_feature	57948450	57948497	1.32e-06	+	1	ID=HMM_SL2.30ch07_56000000_62220000_2_110;Name=HMM_SL2.30ch07_56000000_62220000_2_110;Score=1.32e-06;Sequence=LKRLNLSNNKYTNRIA
SL2.30ch07_56000000_62220000_2	fimo	sequence_feature	56928693	56928740	1.65e-06	+	1	ID=HMM_SL2.30ch07_56000000_62220000_2_111;Name=HMM_SL2.30ch07_56000000_62220000_2_111;Score=1.65e-06;Sequence=LVYLNLSNSNLIRPFE
SL2.30ch07_56000000_62220000_2	fimo	sequence_feature	61630983	61631030	1.82e-06	+	1	ID=HMM_SL2.30ch07_56000000_62220000_2_112;Name=HMM_SL2.30ch07_56000000_62220000_2_112;Score=1.82e-06;Sequence=LRFLNANLNKLNFKIN
SL2.30ch07_56000000_62220000_2	fimo	sequence_feature	56767548	56767595	2.56e-06	+	1	ID=HMM_SL2.30ch07_56000000_62220000_2_113;Name=HMM_SL2.30ch07_56000000_62220000_2_113;Score=2.56e-06;Sequence=LAYQSLSRNALVHDID
SL2.30ch07_56000000_62220000_2	fimo	sequence_feature	57314610	57314657	2.85e-06	+	1	ID=HMM_SL2.30ch07_56000000_62220000_2_114;Name=HMM_SL2.30ch07_56000000_62220000_2_114;Score=2.85e-06;Sequence=QLLLNLFNNNSIMKIL
SL2.30ch07_56000000_62220000_2	fimo	sequence_feature	56612535	56612582	3.27e-06	+	1	ID=HMM_SL2.30ch07_56000000_62220000_2_115;Name=HMM_SL2.30ch07_56000000_62220000_2_115;Score=3.27e-06;Sequence=KILLVISFNHGNFSIP
SL2.30ch07_56000000_62220000_2	fimo	sequence_feature	56245782	56245829	3.89e-06	+	1	ID=HMM_SL2.30ch07_56000000_62220000_2_116;Name=HMM_SL2.30ch07_56000000_62220000_2_116;Score=3.89e-06;Sequence=LRVLVLSFLYLVANIT
SL2.30ch07_56000000_62220000_2	fimo	sequence_feature	59099061	59099108	4.63e-06	+	1	ID=HMM_SL2.30ch07_56000000_62220000_2_117;Name=HMM_SL2.30ch07_56000000_62220000_2_117;Score=4.63e-06;Sequence=LNILYNFYSNSNLRIP
SL2.30ch07_56000000_62220000_2	fimo	sequence_feature	60969543	60969590	4.95e-06	+	1	ID=HMM_SL2.30ch07_56000000_62220000_2_118;Name=HMM_SL2.30ch07_56000000_62220000_2_118;Score=4.95e-06;Sequence=LNFLNKSVDHLIGMLK
SL2.30ch07_56000000_62220000_2	fimo	sequence_feature	58039416	58039463	5.86e-06	+	1	ID=HMM_SL2.30ch07_56000000_62220000_2_119;Name=HMM_SL2.30ch07_56000000_62220000_2_119;Score=5.86e-06;Sequence=LNGLNLNHSDSNLKIK
SL2.30ch07_56000000_62220000_2	fimo	sequence_feature	62153121	62153168	5.86e-06	+	1	ID=HMM_SL2.30ch07_56000000_62220000_2_120;Name=HMM_SL2.30ch07_56000000_62220000_2_120;Score=5.86e-06;Sequence=FSTLNQIFRTDTGKIP
SL2.30ch07_56000000_62220000_2	fimo	sequence_feature	59340000	59340047	6.26e-06	+	1	ID=HMM_SL2.30ch07_56000000_62220000_2_121;Name=HMM_SL2.30ch07_56000000_62220000_2_121;Score=6.26e-06;Sequence=LLAIHLSSLSLESHSP
SL2.30ch07_56000000_62220000_2	fimo	sequence_feature	56937246	56937293	8.61e-06	+	1	ID=HMM_SL2.30ch07_56000000_62220000_2_122;Name=HMM_SL2.30ch07_56000000_62220000_2_122;Score=8.61e-06;Sequence=QLLLQLFYTSLMAHIL
SL2.30ch07_56000000_62220000_2	fimo	sequence_feature	56301288	56301335	8.87e-06	+	1	ID=HMM_SL2.30ch07_56000000_62220000_2_123;Name=HMM_SL2.30ch07_56000000_62220000_2_123;Score=8.87e-06;Sequence=LLVWVPFCNNLIGRYT
SL2.30ch07_56000000_62220000_2	fimo	sequence_feature	58174068	58174115	9.43e-06	+	1	ID=HMM_SL2.30ch07_56000000_62220000_2_124;Name=HMM_SL2.30ch07_56000000_62220000_2_124;Score=9.43e-06;Sequence=LSILVHSYIHLRVSIH
SL2.30ch07_56000000_62220000_2	fimo	sequence_feature	56442993	56443040	1.09e-05	+	1	ID=HMM_SL2.30ch07_56000000_62220000_2_125;Name=HMM_SL2.30ch07_56000000_62220000_2_125;Score=1.09e-05;Sequence=LSFLLLATASLSFSLP
SL2.30ch07_56000000_62220000_2	fimo	sequence_feature	61385805	61385852	1.09e-05	+	1	ID=HMM_SL2.30ch07_56000000_62220000_2_126;Name=HMM_SL2.30ch07_56000000_62220000_2_126;Score=1.09e-05;Sequence=LILTSNFYSTQIGTIP
SL2.30ch07_56000000_62220000_2	fimo	sequence_feature	59883711	59883758	1.16e-05	+	1	ID=HMM_SL2.30ch07_56000000_62220000_2_127;Name=HMM_SL2.30ch07_56000000_62220000_2_127;Score=1.16e-05;Sequence=LARLSLFSSNLARLSP
SL2.30ch07_56000000_62220000_2	fimo	sequence_feature	61539618	61539665	1.16e-05	+	1	ID=HMM_SL2.30ch07_56000000_62220000_2_128;Name=HMM_SL2.30ch07_56000000_62220000_2_128;Score=1.16e-05;Sequence=LLFLYAIENNFTFRII
SL2.30ch07_56000000_62220000_2	fimo	sequence_feature	58237977	58238024	1.19e-05	+	1	ID=HMM_SL2.30ch07_56000000_62220000_2_129;Name=HMM_SL2.30ch07_56000000_62220000_2_129;Score=1.19e-05;Sequence=LIILYLIFNFLLSLII
SL2.30ch07_56000000_62220000_2	fimo	sequence_feature	61756788	61756835	1.23e-05	+	1	ID=HMM_SL2.30ch07_56000000_62220000_2_130;Name=HMM_SL2.30ch07_56000000_62220000_2_130;Score=1.23e-05;Sequence=LVLLILIGYRLNMEIH
SL2.30ch07_56000000_62220000_2	fimo	sequence_feature	56410530	56410577	1.3e-05	+	1	ID=HMM_SL2.30ch07_56000000_62220000_2_131;Name=HMM_SL2.30ch07_56000000_62220000_2_131;Score=1.3e-05;Sequence=LEKLSLAENSLTVIYH
SL2.30ch07_56000000_62220000_2	fimo	sequence_feature	56279382	56279429	1.34e-05	+	1	ID=HMM_SL2.30ch07_56000000_62220000_2_132;Name=HMM_SL2.30ch07_56000000_62220000_2_132;Score=1.34e-05;Sequence=LLVLDLGANDVVGNSS
SL2.30ch07_56000000_62220000_2	fimo	sequence_feature	61674243	61674290	1.37e-05	+	1	ID=HMM_SL2.30ch07_56000000_62220000_2_133;Name=HMM_SL2.30ch07_56000000_62220000_2_133;Score=1.37e-05;Sequence=LVDISLQDNKKNGEIF
SL2.30ch07_56000000_62220000_2	fimo	sequence_feature	59338581	59338628	1.49e-05	+	1	ID=HMM_SL2.30ch07_56000000_62220000_2_134;Name=HMM_SL2.30ch07_56000000_62220000_2_134;Score=1.49e-05;Sequence=LLLSSLIDNILRETIF
SL2.30ch07_56000000_62220000_2	fimo	sequence_feature	58174776	58174823	1.62e-05	+	1	ID=HMM_SL2.30ch07_56000000_62220000_2_135;Name=HMM_SL2.30ch07_56000000_62220000_2_135;Score=1.62e-05;Sequence=LLSLTLCYCRLSGTIM
SL2.30ch07_56000000_62220000_2	fimo	sequence_feature	60550464	60550511	1.67e-05	+	1	ID=HMM_SL2.30ch07_56000000_62220000_2_136;Name=HMM_SL2.30ch07_56000000_62220000_2_136;Score=1.67e-05;Sequence=LLQLVLFFLQRVLDIH
SL2.30ch07_56000000_62220000_2	fimo	sequence_feature	60579933	60579980	1.71e-05	+	1	ID=HMM_SL2.30ch07_56000000_62220000_2_137;Name=HMM_SL2.30ch07_56000000_62220000_2_137;Score=1.71e-05;Sequence=KILLQENFNRNISSIP
SL2.30ch07_56000000_62220000_2	fimo	sequence_feature	56077317	56077364	1.76e-05	+	1	ID=HMM_SL2.30ch07_56000000_62220000_2_138;Name=HMM_SL2.30ch07_56000000_62220000_2_138;Score=1.76e-05;Sequence=DRNLNESQNHNEIRIT
SL2.30ch07_56000000_62220000_2	fimo	sequence_feature	57546573	57546620	1.81e-05	+	1	ID=HMM_SL2.30ch07_56000000_62220000_2_139;Name=HMM_SL2.30ch07_56000000_62220000_2_139;Score=1.81e-05;Sequence=LSALILLFVILTGRIF
SL2.30ch07_56000000_62220000_2	fimo	sequence_feature	59534904	59534951	1.81e-05	+	1	ID=HMM_SL2.30ch07_56000000_62220000_2_140;Name=HMM_SL2.30ch07_56000000_62220000_2_140;Score=1.81e-05;Sequence=LLVAQLFDFRLIGEGS
SL2.30ch07_56000000_62220000_2	fimo	sequence_feature	60061362	60061409	1.81e-05	+	1	ID=HMM_SL2.30ch07_56000000_62220000_2_141;Name=HMM_SL2.30ch07_56000000_62220000_2_141;Score=1.81e-05;Sequence=LHLRQLISKNIVGLIL
SL2.30ch07_56000000_62220000_2	fimo	sequence_feature	59057904	59057951	2.02e-05	+	1	ID=HMM_SL2.30ch07_56000000_62220000_2_142;Name=HMM_SL2.30ch07_56000000_62220000_2_142;Score=2.02e-05;Sequence=AAKLNFSHNNFISSII
SL2.30ch07_56000000_62220000_2	fimo	sequence_feature	56514687	56514734	2.13e-05	+	1	ID=HMM_SL2.30ch07_56000000_62220000_2_143;Name=HMM_SL2.30ch07_56000000_62220000_2_143;Score=2.13e-05;Sequence=KLYLQLFGNEHIRPSP
SL2.30ch07_56000000_62220000_2	fimo	sequence_feature	58118517	58118564	2.19e-05	+	1	ID=HMM_SL2.30ch07_56000000_62220000_2_144;Name=HMM_SL2.30ch07_56000000_62220000_2_144;Score=2.19e-05;Sequence=KVFLNLSKSRLIYQIE
SL2.30ch07_56000000_62220000_2	fimo	sequence_feature	61479825	61479872	2.19e-05	+	1	ID=HMM_SL2.30ch07_56000000_62220000_2_145;Name=HMM_SL2.30ch07_56000000_62220000_2_145;Score=2.19e-05;Sequence=LSKQNLIFNLRVNNIF
SL2.30ch07_56000000_62220000_2	fimo	sequence_feature	60084546	60084593	2.26e-05	+	1	ID=HMM_SL2.30ch07_56000000_62220000_2_146;Name=HMM_SL2.30ch07_56000000_62220000_2_146;Score=2.26e-05;Sequence=YAILILSFNSLNFHKN
SL2.30ch07_56000000_62220000_2	fimo	sequence_feature	61086381	61086428	2.26e-05	+	1	ID=HMM_SL2.30ch07_56000000_62220000_2_147;Name=HMM_SL2.30ch07_56000000_62220000_2_147;Score=2.26e-05;Sequence=TSTLYLICTSMKGAIQ
SL2.30ch07_56000000_62220000_2	fimo	sequence_feature	56887095	56887142	2.38e-05	+	1	ID=HMM_SL2.30ch07_56000000_62220000_2_148;Name=HMM_SL2.30ch07_56000000_62220000_2_148;Score=2.38e-05;Sequence=ISNLVCTHNHLNIHIF
SL2.30ch07_56000000_62220000_2	fimo	sequence_feature	59381187	59381234	2.38e-05	+	1	ID=HMM_SL2.30ch07_56000000_62220000_2_149;Name=HMM_SL2.30ch07_56000000_62220000_2_149;Score=2.38e-05;Sequence=LGPLDLSVDVLVSNID
SL2.30ch07_56000000_62220000_2	fimo	sequence_feature	61328160	61328207	2.59e-05	+	1	ID=HMM_SL2.30ch07_56000000_62220000_2_150;Name=HMM_SL2.30ch07_56000000_62220000_2_150;Score=2.59e-05;Sequence=LNHLNLGALKLAGHNI
SL2.30ch07_56000000_62220000_2	fimo	sequence_feature	59348151	59348198	2.82e-05	+	1	ID=HMM_SL2.30ch07_56000000_62220000_2_151;Name=HMM_SL2.30ch07_56000000_62220000_2_151;Score=2.82e-05;Sequence=LIFLNFWYFQMNIAIP
SL2.30ch07_56000000_62220000_2	fimo	sequence_feature	59429376	59429423	2.82e-05	+	1	ID=HMM_SL2.30ch07_56000000_62220000_2_152;Name=HMM_SL2.30ch07_56000000_62220000_2_152;Score=2.82e-05;Sequence=LIALDLNINILSRHWH
SL2.30ch07_56000000_62220000_2	fimo	sequence_feature	61549086	61549133	2.82e-05	+	1	ID=HMM_SL2.30ch07_56000000_62220000_2_153;Name=HMM_SL2.30ch07_56000000_62220000_2_153;Score=2.82e-05;Sequence=IFISNLSHNLLIVSIF
SL2.30ch07_56000000_62220000_2	fimo	sequence_feature	56324151	56324198	2.9e-05	+	1	ID=HMM_SL2.30ch07_56000000_62220000_2_154;Name=HMM_SL2.30ch07_56000000_62220000_2_154;Score=2.9e-05;Sequence=LTVLNAFEGYLWGQIC
SL2.30ch07_56000000_62220000_2	fimo	sequence_feature	59067123	59067170	2.9e-05	+	1	ID=HMM_SL2.30ch07_56000000_62220000_2_155;Name=HMM_SL2.30ch07_56000000_62220000_2_155;Score=2.9e-05;Sequence=LLALSVITTSLSRPIS
SL2.30ch07_56000000_62220000_2	fimo	sequence_feature	60239559	60239606	2.99e-05	+	1	ID=HMM_SL2.30ch07_56000000_62220000_2_156;Name=HMM_SL2.30ch07_56000000_62220000_2_156;Score=2.99e-05;Sequence=SILLSLSYNNLSIFMS
SL2.30ch07_56000000_62220000_2	fimo	sequence_feature	62022549	62022596	3.16e-05	+	1	ID=HMM_SL2.30ch07_56000000_62220000_2_157;Name=HMM_SL2.30ch07_56000000_62220000_2_157;Score=3.16e-05;Sequence=CGFGKLSWNTLKLQII
SL2.30ch07_56000000_62220000_2	fimo	sequence_feature	60823086	60823133	3.26e-05	+	1	ID=HMM_SL2.30ch07_56000000_62220000_2_158;Name=HMM_SL2.30ch07_56000000_62220000_2_158;Score=3.26e-05;Sequence=YIFLSLGDNDLERDVK
SL2.30ch07_56000000_62220000_2	fimo	sequence_feature	56564913	56564960	3.45e-05	+	1	ID=HMM_SL2.30ch07_56000000_62220000_2_159;Name=HMM_SL2.30ch07_56000000_62220000_2_159;Score=3.45e-05;Sequence=KHFKNSFFNSSVGEIR
SL2.30ch07_56000000_62220000_2	fimo	sequence_feature	58967667	58967714	3.45e-05	+	1	ID=HMM_SL2.30ch07_56000000_62220000_2_160;Name=HMM_SL2.30ch07_56000000_62220000_2_160;Score=3.45e-05;Sequence=LRALNLSGNSIGLYLI
SL2.30ch07_56000000_62220000_2	fimo	sequence_feature	58594536	58594583	3.66e-05	+	1	ID=HMM_SL2.30ch07_56000000_62220000_2_161;Name=HMM_SL2.30ch07_56000000_62220000_2_161;Score=3.66e-05;Sequence=TRTTDLQDSSLVGQRP
SL2.30ch07_56000000_62220000_2	fimo	sequence_feature	60795600	60795647	3.77e-05	+	1	ID=HMM_SL2.30ch07_56000000_62220000_2_162;Name=HMM_SL2.30ch07_56000000_62220000_2_162;Score=3.77e-05;Sequence=LGILLVSYNSTGETIY
SL2.30ch07_56000000_62220000_2	fimo	sequence_feature	58506099	58506146	4e-05	+	1	ID=HMM_SL2.30ch07_56000000_62220000_2_163;Name=HMM_SL2.30ch07_56000000_62220000_2_163;Score=4e-05;Sequence=VETLVLMTLHLGGGIS
SL2.30ch07_56000000_62220000_2	fimo	sequence_feature	60347376	60347423	4e-05	+	1	ID=HMM_SL2.30ch07_56000000_62220000_2_164;Name=HMM_SL2.30ch07_56000000_62220000_2_164;Score=4e-05;Sequence=LNYLNLNTNNYVHGVK
SL2.30ch07_56000000_62220000_2	fimo	sequence_feature	60770013	60770060	4.12e-05	+	1	ID=HMM_SL2.30ch07_56000000_62220000_2_165;Name=HMM_SL2.30ch07_56000000_62220000_2_165;Score=4.12e-05;Sequence=LLCLVHSNPLLTIGIP
SL2.30ch07_56000000_62220000_2	fimo	sequence_feature	61005777	61005824	4.12e-05	+	1	ID=HMM_SL2.30ch07_56000000_62220000_2_166;Name=HMM_SL2.30ch07_56000000_62220000_2_166;Score=4.12e-05;Sequence=YRTLNLSFNKYKKTKK
SL2.30ch07_56000000_62220000_2	fimo	sequence_feature	57298509	57298556	4.25e-05	+	1	ID=HMM_SL2.30ch07_56000000_62220000_2_167;Name=HMM_SL2.30ch07_56000000_62220000_2_167;Score=4.25e-05;Sequence=LCFLDRFCNLCRFMIL
SL2.30ch07_56000000_62220000_2	fimo	sequence_feature	60225660	60225707	4.25e-05	+	1	ID=HMM_SL2.30ch07_56000000_62220000_2_168;Name=HMM_SL2.30ch07_56000000_62220000_2_168;Score=4.25e-05;Sequence=KLRSDISYNHLRHKIV
SL2.30ch07_56000000_62220000_2	fimo	sequence_feature	61083699	61083746	4.25e-05	+	1	ID=HMM_SL2.30ch07_56000000_62220000_2_169;Name=HMM_SL2.30ch07_56000000_62220000_2_169;Score=4.25e-05;Sequence=LVLLNLSSTVTTFMGI
SL2.30ch07_56000000_62220000_2	fimo	sequence_feature	57017538	57017585	4.38e-05	+	1	ID=HMM_SL2.30ch07_56000000_62220000_2_170;Name=HMM_SL2.30ch07_56000000_62220000_2_170;Score=4.38e-05;Sequence=LLFLFLSYVDLSFKYL
SL2.30ch07_56000000_62220000_2	fimo	sequence_feature	57837411	57837458	4.51e-05	+	1	ID=HMM_SL2.30ch07_56000000_62220000_2_171;Name=HMM_SL2.30ch07_56000000_62220000_2_171;Score=4.51e-05;Sequence=LNNLNIFLNTWHSTIC
SL2.30ch07_56000000_62220000_2	fimo	sequence_feature	56412090	56412137	4.65e-05	+	1	ID=HMM_SL2.30ch07_56000000_62220000_2_172;Name=HMM_SL2.30ch07_56000000_62220000_2_172;Score=4.65e-05;Sequence=SLLLQYSSNRLLCPSP
SL2.30ch07_56000000_62220000_2	fimo	sequence_feature	58735269	58735316	4.65e-05	+	1	ID=HMM_SL2.30ch07_56000000_62220000_2_173;Name=HMM_SL2.30ch07_56000000_62220000_2_173;Score=4.65e-05;Sequence=LLLLNISIKKLINNIS
SL2.30ch07_56000000_62220000_2	fimo	sequence_feature	57764865	57764912	4.79e-05	+	1	ID=HMM_SL2.30ch07_56000000_62220000_2_174;Name=HMM_SL2.30ch07_56000000_62220000_2_174;Score=4.79e-05;Sequence=ITHNHLNYHNYTGEIN
SL2.30ch07_56000000_62220000_2	fimo	sequence_feature	56935326	56935373	4.94e-05	+	1	ID=HMM_SL2.30ch07_56000000_62220000_2_175;Name=HMM_SL2.30ch07_56000000_62220000_2_175;Score=4.94e-05;Sequence=FSFYNLFTKNLSHKIN
SL2.30ch07_56000000_62220000_2	fimo	sequence_feature	57738906	57738953	4.94e-05	+	1	ID=HMM_SL2.30ch07_56000000_62220000_2_176;Name=HMM_SL2.30ch07_56000000_62220000_2_176;Score=4.94e-05;Sequence=LHIKKNNNNNKNGPIK
SL2.30ch07_56000000_62220000_2	fimo	sequence_feature	57877008	57877055	4.94e-05	+	1	ID=HMM_SL2.30ch07_56000000_62220000_2_177;Name=HMM_SL2.30ch07_56000000_62220000_2_177;Score=4.94e-05;Sequence=LWCFWLSFNFDIGRIS
SL2.30ch07_56000000_62220000_2	fimo	sequence_feature	60035127	60035174	4.94e-05	+	1	ID=HMM_SL2.30ch07_56000000_62220000_2_178;Name=HMM_SL2.30ch07_56000000_62220000_2_178;Score=4.94e-05;Sequence=LVHLSLSANHCISAFC
SL2.30ch07_56000000_62220000_2	fimo	sequence_feature	61381404	61381451	4.94e-05	+	1	ID=HMM_SL2.30ch07_56000000_62220000_2_179;Name=HMM_SL2.30ch07_56000000_62220000_2_179;Score=4.94e-05;Sequence=LGFLHLFHIKYSPFIF
SL2.30ch07_56000000_62220000_2	fimo	sequence_feature	61923153	61923200	4.94e-05	+	1	ID=HMM_SL2.30ch07_56000000_62220000_2_180;Name=HMM_SL2.30ch07_56000000_62220000_2_180;Score=4.94e-05;Sequence=LTILNVINNGTKRTSP
SL2.30ch07_56000000_62220000_2	fimo	sequence_feature	57715290	57715337	5.41e-05	+	1	ID=HMM_SL2.30ch07_56000000_62220000_2_181;Name=HMM_SL2.30ch07_56000000_62220000_2_181;Score=5.41e-05;Sequence=LGALILMECILHGSIV
SL2.30ch07_56000000_62220000_2	fimo	sequence_feature	60704430	60704477	5.41e-05	+	1	ID=HMM_SL2.30ch07_56000000_62220000_2_182;Name=HMM_SL2.30ch07_56000000_62220000_2_182;Score=5.41e-05;Sequence=LTYVYLSQWSFGTRFP
SL2.30ch07_56000000_62220000_2	fimo	sequence_feature	57009201	57009248	5.58e-05	+	1	ID=HMM_SL2.30ch07_56000000_62220000_2_183;Name=HMM_SL2.30ch07_56000000_62220000_2_183;Score=5.58e-05;Sequence=LLHLDLIKNSSINDYD
SL2.30ch07_56000000_62220000_2	fimo	sequence_feature	61425054	61425101	5.58e-05	+	1	ID=HMM_SL2.30ch07_56000000_62220000_2_184;Name=HMM_SL2.30ch07_56000000_62220000_2_184;Score=5.58e-05;Sequence=FTGLLLSTIDLTGHYI
SL2.30ch07_56000000_62220000_2	fimo	sequence_feature	59279040	59279087	5.75e-05	+	1	ID=HMM_SL2.30ch07_56000000_62220000_2_185;Name=HMM_SL2.30ch07_56000000_62220000_2_185;Score=5.75e-05;Sequence=LSISYLITNKLGYMLI
SL2.30ch07_56000000_62220000_2	fimo	sequence_feature	60298947	60298994	5.75e-05	+	1	ID=HMM_SL2.30ch07_56000000_62220000_2_186;Name=HMM_SL2.30ch07_56000000_62220000_2_186;Score=5.75e-05;Sequence=KATLILSRAQLMGLAF
SL2.30ch07_56000000_62220000_2	fimo	sequence_feature	57408519	57408566	6.11e-05	+	1	ID=HMM_SL2.30ch07_56000000_62220000_2_187;Name=HMM_SL2.30ch07_56000000_62220000_2_187;Score=6.11e-05;Sequence=LLLNNIINNHNISRIR
SL2.30ch07_56000000_62220000_2	fimo	sequence_feature	59596962	59597009	6.11e-05	+	1	ID=HMM_SL2.30ch07_56000000_62220000_2_188;Name=HMM_SL2.30ch07_56000000_62220000_2_188;Score=6.11e-05;Sequence=LTEADLIWNSIMLPSQ
SL2.30ch07_56000000_62220000_2	fimo	sequence_feature	60044613	60044660	6.11e-05	+	1	ID=HMM_SL2.30ch07_56000000_62220000_2_189;Name=HMM_SL2.30ch07_56000000_62220000_2_189;Score=6.11e-05;Sequence=LSLAYYFHHSDSGTIS
SL2.30ch07_56000000_62220000_2	fimo	sequence_feature	62110113	62110160	6.11e-05	+	1	ID=HMM_SL2.30ch07_56000000_62220000_2_190;Name=HMM_SL2.30ch07_56000000_62220000_2_190;Score=6.11e-05;Sequence=LSKGQLSYNSTIPPDT
SL2.30ch07_56000000_62220000_2	fimo	sequence_feature	57302745	57302792	6.3e-05	+	1	ID=HMM_SL2.30ch07_56000000_62220000_2_191;Name=HMM_SL2.30ch07_56000000_62220000_2_191;Score=6.3e-05;Sequence=FSHWVLSSKVLTRHII
SL2.30ch07_56000000_62220000_2	fimo	sequence_feature	57845868	57845915	6.3e-05	+	1	ID=HMM_SL2.30ch07_56000000_62220000_2_192;Name=HMM_SL2.30ch07_56000000_62220000_2_192;Score=6.3e-05;Sequence=TSFLDLIQYSLNVRYT
SL2.30ch07_56000000_62220000_2	fimo	sequence_feature	57867309	57867356	6.49e-05	+	1	ID=HMM_SL2.30ch07_56000000_62220000_2_193;Name=HMM_SL2.30ch07_56000000_62220000_2_193;Score=6.49e-05;Sequence=TAFLDLIQYSLEVRHK
SL2.30ch07_56000000_62220000_2	fimo	sequence_feature	62070771	62070818	6.49e-05	+	1	ID=HMM_SL2.30ch07_56000000_62220000_2_194;Name=HMM_SL2.30ch07_56000000_62220000_2_194;Score=6.49e-05;Sequence=LARLSPPSPNLSFHIY
SL2.30ch07_56000000_62220000_2	fimo	sequence_feature	57336084	57336131	6.69e-05	+	1	ID=HMM_SL2.30ch07_56000000_62220000_2_195;Name=HMM_SL2.30ch07_56000000_62220000_2_195;Score=6.69e-05;Sequence=LSYCELIQNDISLTIS
SL2.30ch07_56000000_62220000_2	fimo	sequence_feature	61260663	61260710	6.69e-05	+	1	ID=HMM_SL2.30ch07_56000000_62220000_2_196;Name=HMM_SL2.30ch07_56000000_62220000_2_196;Score=6.69e-05;Sequence=SRGKNLQRNLMKGTRP
SL2.30ch07_56000000_62220000_2	fimo	sequence_feature	57288024	57288071	6.89e-05	+	1	ID=HMM_SL2.30ch07_56000000_62220000_2_197;Name=HMM_SL2.30ch07_56000000_62220000_2_197;Score=6.89e-05;Sequence=AGWLNLICESLNSLRP
SL2.30ch07_56000000_62220000_2	fimo	sequence_feature	61034088	61034135	6.89e-05	+	1	ID=HMM_SL2.30ch07_56000000_62220000_2_198;Name=HMM_SL2.30ch07_56000000_62220000_2_198;Score=6.89e-05;Sequence=LNNLCLIFGSLTLHYF
SL2.30ch07_56000000_62220000_2	fimo	sequence_feature	59424597	59424644	7.11e-05	+	1	ID=HMM_SL2.30ch07_56000000_62220000_2_199;Name=HMM_SL2.30ch07_56000000_62220000_2_199;Score=7.11e-05;Sequence=LHLFLLFYKLLEYHIH
SL2.30ch07_56000000_62220000_2	fimo	sequence_feature	59347047	59347094	7.32e-05	+	1	ID=HMM_SL2.30ch07_56000000_62220000_2_200;Name=HMM_SL2.30ch07_56000000_62220000_2_200;Score=7.32e-05;Sequence=LPFLFLISGTLQGTDS
SL2.30ch07_56000000_62220000_2	fimo	sequence_feature	59773794	59773841	7.32e-05	+	1	ID=HMM_SL2.30ch07_56000000_62220000_2_201;Name=HMM_SL2.30ch07_56000000_62220000_2_201;Score=7.32e-05;Sequence=VIQLTLSNNSLVSLST
SL2.30ch07_56000000_62220000_2	fimo	sequence_feature	61528848	61528895	7.32e-05	+	1	ID=HMM_SL2.30ch07_56000000_62220000_2_202;Name=HMM_SL2.30ch07_56000000_62220000_2_202;Score=7.32e-05;Sequence=IVLLSLFVNHVIRQIK
SL2.30ch07_56000000_62220000_2	fimo	sequence_feature	56743626	56743673	7.54e-05	+	1	ID=HMM_SL2.30ch07_56000000_62220000_2_203;Name=HMM_SL2.30ch07_56000000_62220000_2_203;Score=7.54e-05;Sequence=EQALVNIPNSLSFPIH
SL2.30ch07_56000000_62220000_2	fimo	sequence_feature	57152304	57152351	7.54e-05	+	1	ID=HMM_SL2.30ch07_56000000_62220000_2_204;Name=HMM_SL2.30ch07_56000000_62220000_2_204;Score=7.54e-05;Sequence=LYLLNLHFNNLNIFEE
SL2.30ch07_56000000_62220000_2	fimo	sequence_feature	58720674	58720721	7.54e-05	+	1	ID=HMM_SL2.30ch07_56000000_62220000_2_205;Name=HMM_SL2.30ch07_56000000_62220000_2_205;Score=7.54e-05;Sequence=LNRLNGNYVTLKSIVP
SL2.30ch07_56000000_62220000_2	fimo	sequence_feature	57700326	57700373	7.77e-05	+	1	ID=HMM_SL2.30ch07_56000000_62220000_2_206;Name=HMM_SL2.30ch07_56000000_62220000_2_206;Score=7.77e-05;Sequence=LVNLILCFANLVNASP
SL2.30ch07_56000000_62220000_2	fimo	sequence_feature	58969203	58969250	7.77e-05	+	1	ID=HMM_SL2.30ch07_56000000_62220000_2_207;Name=HMM_SL2.30ch07_56000000_62220000_2_207;Score=7.77e-05;Sequence=LNVLDLRFNKISTAKC
SL2.30ch07_56000000_62220000_2	fimo	sequence_feature	60862425	60862472	7.77e-05	+	1	ID=HMM_SL2.30ch07_56000000_62220000_2_208;Name=HMM_SL2.30ch07_56000000_62220000_2_208;Score=7.77e-05;Sequence=LVLAQTIQNNFSLHIN
SL2.30ch07_56000000_62220000_2	fimo	sequence_feature	61089627	61089674	7.77e-05	+	1	ID=HMM_SL2.30ch07_56000000_62220000_2_209;Name=HMM_SL2.30ch07_56000000_62220000_2_209;Score=7.77e-05;Sequence=VSHLSLHTNRTTHPHP
SL2.30ch07_56000000_62220000_2	fimo	sequence_feature	56332368	56332415	8.01e-05	+	1	ID=HMM_SL2.30ch07_56000000_62220000_2_210;Name=HMM_SL2.30ch07_56000000_62220000_2_210;Score=8.01e-05;Sequence=LIFFVLGFIMSSLPIP
SL2.30ch07_56000000_62220000_2	fimo	sequence_feature	59953158	59953205	8.01e-05	+	1	ID=HMM_SL2.30ch07_56000000_62220000_2_211;Name=HMM_SL2.30ch07_56000000_62220000_2_211;Score=8.01e-05;Sequence=LSIQVGTTRILHGKIP
SL2.30ch07_56000000_62220000_2	fimo	sequence_feature	57471057	57471104	8.25e-05	+	1	ID=HMM_SL2.30ch07_56000000_62220000_2_212;Name=HMM_SL2.30ch07_56000000_62220000_2_212;Score=8.25e-05;Sequence=LQICQQSYYSLNGKKD
SL2.30ch07_56000000_62220000_2	fimo	sequence_feature	61085133	61085180	8.25e-05	+	1	ID=HMM_SL2.30ch07_56000000_62220000_2_213;Name=HMM_SL2.30ch07_56000000_62220000_2_213;Score=8.25e-05;Sequence=FIVLNFISNSYISKIK
SL2.30ch07_56000000_62220000_2	fimo	sequence_feature	56985702	56985749	8.49e-05	+	1	ID=HMM_SL2.30ch07_56000000_62220000_2_214;Name=HMM_SL2.30ch07_56000000_62220000_2_214;Score=8.49e-05;Sequence=RINLNLKYVTLESRRP
SL2.30ch07_56000000_62220000_2	fimo	sequence_feature	57025071	57025118	8.49e-05	+	1	ID=HMM_SL2.30ch07_56000000_62220000_2_215;Name=HMM_SL2.30ch07_56000000_62220000_2_215;Score=8.49e-05;Sequence=ENFLVLISPNTVSHCP
SL2.30ch07_56000000_62220000_2	fimo	sequence_feature	57382701	57382748	8.49e-05	+	1	ID=HMM_SL2.30ch07_56000000_62220000_2_216;Name=HMM_SL2.30ch07_56000000_62220000_2_216;Score=8.49e-05;Sequence=LRLCVLRYNSLGEQQK
SL2.30ch07_56000000_62220000_2	fimo	sequence_feature	56277426	56277473	8.75e-05	+	1	ID=HMM_SL2.30ch07_56000000_62220000_2_217;Name=HMM_SL2.30ch07_56000000_62220000_2_217;Score=8.75e-05;Sequence=LHLLQLHCSECISTIA
SL2.30ch07_56000000_62220000_2	fimo	sequence_feature	58331844	58331891	8.75e-05	+	1	ID=HMM_SL2.30ch07_56000000_62220000_2_218;Name=HMM_SL2.30ch07_56000000_62220000_2_218;Score=8.75e-05;Sequence=LNYVKLNQNTKNISIT
SL2.30ch07_56000000_62220000_2	fimo	sequence_feature	61757022	61757069	8.75e-05	+	1	ID=HMM_SL2.30ch07_56000000_62220000_2_219;Name=HMM_SL2.30ch07_56000000_62220000_2_219;Score=8.75e-05;Sequence=SRKIQLFHQQLIGHRQ
SL2.30ch07_56000000_62220000_2	fimo	sequence_feature	56239437	56239484	9.01e-05	+	1	ID=HMM_SL2.30ch07_56000000_62220000_2_220;Name=HMM_SL2.30ch07_56000000_62220000_2_220;Score=9.01e-05;Sequence=LNILNLNYTKTQNYIC
SL2.30ch07_56000000_62220000_2	fimo	sequence_feature	59785314	59785361	9.01e-05	+	1	ID=HMM_SL2.30ch07_56000000_62220000_2_221;Name=HMM_SL2.30ch07_56000000_62220000_2_221;Score=9.01e-05;Sequence=LFLLLLPHNHLVNDNF
SL2.30ch07_56000000_62220000_2	fimo	sequence_feature	61524204	61524251	9.01e-05	+	1	ID=HMM_SL2.30ch07_56000000_62220000_2_222;Name=HMM_SL2.30ch07_56000000_62220000_2_222;Score=9.01e-05;Sequence=KNELNWNGNIEEGEIG
SL2.30ch07_56000000_62220000_2	fimo	sequence_feature	61743219	61743266	9.01e-05	+	1	ID=HMM_SL2.30ch07_56000000_62220000_2_223;Name=HMM_SL2.30ch07_56000000_62220000_2_223;Score=9.01e-05;Sequence=LILLQLYNAQLYNSLP
SL2.30ch07_56000000_62220000_2	fimo	sequence_feature	58562589	58562636	9.27e-05	+	1	ID=HMM_SL2.30ch07_56000000_62220000_2_224;Name=HMM_SL2.30ch07_56000000_62220000_2_224;Score=9.27e-05;Sequence=LVMLVLSKSLLVELCP
SL2.30ch07_56000000_62220000_2	fimo	sequence_feature	59657730	59657777	9.27e-05	+	1	ID=HMM_SL2.30ch07_56000000_62220000_2_225;Name=HMM_SL2.30ch07_56000000_62220000_2_225;Score=9.27e-05;Sequence=MGFTHLTQNLIVGLYP
SL2.30ch07_56000000_62220000_2	fimo	sequence_feature	61463778	61463825	9.27e-05	+	1	ID=HMM_SL2.30ch07_56000000_62220000_2_226;Name=HMM_SL2.30ch07_56000000_62220000_2_226;Score=9.27e-05;Sequence=KRLLYLSMKDLVHLID
SL2.30ch07_56000000_62220000_2	fimo	sequence_feature	58634562	58634609	9.55e-05	+	1	ID=HMM_SL2.30ch07_56000000_62220000_2_227;Name=HMM_SL2.30ch07_56000000_62220000_2_227;Score=9.55e-05;Sequence=LSFTYLSNSTLFYSIF
SL2.30ch07_56000000_62220000_2	fimo	sequence_feature	59992323	59992370	9.55e-05	+	1	ID=HMM_SL2.30ch07_56000000_62220000_2_228;Name=HMM_SL2.30ch07_56000000_62220000_2_228;Score=9.55e-05;Sequence=LSFLHTFFFIEKGNII
SL2.30ch07_56000000_62220000_2	fimo	sequence_feature	60944619	60944666	9.55e-05	+	1	ID=HMM_SL2.30ch07_56000000_62220000_2_229;Name=HMM_SL2.30ch07_56000000_62220000_2_229;Score=9.55e-05;Sequence=LTVLNGSWAAYTDTVP
SL2.30ch07_56000000_62220000_2	fimo	sequence_feature	59495637	59495684	9.82e-05	+	1	ID=HMM_SL2.30ch07_56000000_62220000_2_230;Name=HMM_SL2.30ch07_56000000_62220000_2_230;Score=9.82e-05;Sequence=LRLLNLINLDEIDMTN
SL2.30ch07_56000000_62220000_3	fimo	sequence_feature	59831680	59831727	2.11e-14	+	2	ID=HMM_SL2.30ch07_56000000_62220000_3_231;Name=HMM_SL2.30ch07_56000000_62220000_3_231;Score=2.11e-14;Sequence=LGVLNLSCNNLSGRIP
SL2.30ch07_56000000_62220000_3	fimo	sequence_feature	59831608	59831655	1.49e-13	+	2	ID=HMM_SL2.30ch07_56000000_62220000_3_232;Name=HMM_SL2.30ch07_56000000_62220000_3_232;Score=1.49e-13;Sequence=LNFLDLSTNDLTGEIP
SL2.30ch07_56000000_62220000_3	fimo	sequence_feature	59831536	59831583	1.73e-13	+	2	ID=HMM_SL2.30ch07_56000000_62220000_3_233;Name=HMM_SL2.30ch07_56000000_62220000_3_233;Score=1.73e-13;Sequence=LHGLNLSSNNLTGSIP
SL2.30ch07_56000000_62220000_3	fimo	sequence_feature	59829865	59829912	4.19e-13	+	2	ID=HMM_SL2.30ch07_56000000_62220000_3_234;Name=HMM_SL2.30ch07_56000000_62220000_3_234;Score=4.19e-13;Sequence=LTHLDLSGNTLSGQIP
SL2.30ch07_56000000_62220000_3	fimo	sequence_feature	59830879	59830926	6.13e-10	+	2	ID=HMM_SL2.30ch07_56000000_62220000_3_235;Name=HMM_SL2.30ch07_56000000_62220000_3_235;Score=6.13e-10;Sequence=LGYLDLSDNRLSGVLP
SL2.30ch07_56000000_62220000_3	fimo	sequence_feature	59830237	59830284	1.66e-09	+	2	ID=HMM_SL2.30ch07_56000000_62220000_3_236;Name=HMM_SL2.30ch07_56000000_62220000_3_236;Score=1.66e-09;Sequence=LVLLDLSWNRITGSVP
SL2.30ch07_56000000_62220000_3	fimo	sequence_feature	59830672	59830719	2.1e-09	+	2	ID=HMM_SL2.30ch07_56000000_62220000_3_237;Name=HMM_SL2.30ch07_56000000_62220000_3_237;Score=2.1e-09;Sequence=LTFLNLSYNDIGGNVP
SL2.30ch07_56000000_62220000_3	fimo	sequence_feature	59831239	59831286	3.2e-09	+	2	ID=HMM_SL2.30ch07_56000000_62220000_3_238;Name=HMM_SL2.30ch07_56000000_62220000_3_238;Score=3.2e-09;Sequence=LQILDLSENKISGIIP
SL2.30ch07_56000000_62220000_3	fimo	sequence_feature	59829571	59829618	5.53e-09	+	2	ID=HMM_SL2.30ch07_56000000_62220000_3_239;Name=HMM_SL2.30ch07_56000000_62220000_3_239;Score=5.53e-09;Sequence=LKYLDLSYNRISGGIP
SL2.30ch07_56000000_62220000_3	fimo	sequence_feature	56279434	56279481	1.16e-08	+	2	ID=HMM_SL2.30ch07_56000000_62220000_3_240;Name=HMM_SL2.30ch07_56000000_62220000_3_240;Score=1.16e-08;Sequence=LRVLSLRSNKLHGPIR
SL2.30ch07_56000000_62220000_3	fimo	sequence_feature	59830165	59830212	2.54e-08	+	2	ID=HMM_SL2.30ch07_56000000_62220000_3_241;Name=HMM_SL2.30ch07_56000000_62220000_3_241;Score=2.54e-08;Sequence=LRELRLGRNKLNESIP
SL2.30ch07_56000000_62220000_3	fimo	sequence_feature	59830009	59830056	2.72e-08	+	2	ID=HMM_SL2.30ch07_56000000_62220000_3_242;Name=HMM_SL2.30ch07_56000000_62220000_3_242;Score=2.72e-08;Sequence=LKLLQLSSNNLDGQLP
SL2.30ch07_56000000_62220000_3	fimo	sequence_feature	59831092	59831139	3.35e-08	+	2	ID=HMM_SL2.30ch07_56000000_62220000_3_243;Name=HMM_SL2.30ch07_56000000_62220000_3_243;Score=3.35e-08;Sequence=LRVIDVRSNNLSGEIP
SL2.30ch07_56000000_62220000_3	fimo	sequence_feature	59830306	59830353	4.61e-08	+	2	ID=HMM_SL2.30ch07_56000000_62220000_3_244;Name=HMM_SL2.30ch07_56000000_62220000_3_244;Score=4.61e-08;Sequence=LRELYLSHNQLTGVTE
SL2.30ch07_56000000_62220000_3	fimo	sequence_feature	56279668	56279715	5.35e-08	+	2	ID=HMM_SL2.30ch07_56000000_62220000_3_245;Name=HMM_SL2.30ch07_56000000_62220000_3_245;Score=5.35e-08;Sequence=YTTIDLSNNKFEGHIP
SL2.30ch07_56000000_62220000_3	fimo	sequence_feature	59829937	59829984	5.99e-08	+	2	ID=HMM_SL2.30ch07_56000000_62220000_3_246;Name=HMM_SL2.30ch07_56000000_62220000_3_246;Score=5.99e-08;Sequence=LKRLDLSRNTLGGGFP
SL2.30ch07_56000000_62220000_3	fimo	sequence_feature	59831464	59831511	2.57e-07	+	2	ID=HMM_SL2.30ch07_56000000_62220000_3_247;Name=HMM_SL2.30ch07_56000000_62220000_3_247;Score=2.57e-07;Sequence=VKSLDLSSNNMVGEIP
SL2.30ch07_56000000_62220000_3	fimo	sequence_feature	59830744	59830791	2.77e-07	+	2	ID=HMM_SL2.30ch07_56000000_62220000_3_248;Name=HMM_SL2.30ch07_56000000_62220000_3_248;Score=2.77e-07;Sequence=LLCIDLATNKFTGPIP
SL2.30ch07_56000000_62220000_3	fimo	sequence_feature	59830375	59830422	4.68e-07	+	2	ID=HMM_SL2.30ch07_56000000_62220000_3_249;Name=HMM_SL2.30ch07_56000000_62220000_3_249;Score=4.68e-07;Sequence=LEKLYLDFNLLEDTIS
SL2.30ch07_56000000_62220000_3	fimo	sequence_feature	59830948	59830995	7.78e-07	+	2	ID=HMM_SL2.30ch07_56000000_62220000_3_250;Name=HMM_SL2.30ch07_56000000_62220000_3_250;Score=7.78e-07;Sequence=IMHLNLGTNNFFGEIP
SL2.30ch07_56000000_62220000_3	fimo	sequence_feature	59831020	59831067	8.53e-07	+	2	ID=HMM_SL2.30ch07_56000000_62220000_3_251;Name=HMM_SL2.30ch07_56000000_62220000_3_251;Score=8.53e-07;Sequence=MGMLHLQNNHLTGELP
SL2.30ch07_56000000_62220000_3	fimo	sequence_feature	59111413	59111460	1.95e-06	+	2	ID=HMM_SL2.30ch07_56000000_62220000_3_252;Name=HMM_SL2.30ch07_56000000_62220000_3_252;Score=1.95e-06;Sequence=LITISLANNDDKGDIA
SL2.30ch07_56000000_62220000_3	fimo	sequence_feature	61271410	61271457	2.23e-06	+	2	ID=HMM_SL2.30ch07_56000000_62220000_3_253;Name=HMM_SL2.30ch07_56000000_62220000_3_253;Score=2.23e-06;Sequence=LAHLSPSSSNLSFHIY
SL2.30ch07_56000000_62220000_3	fimo	sequence_feature	59830093	59830140	3.27e-06	+	2	ID=HMM_SL2.30ch07_56000000_62220000_3_254;Name=HMM_SL2.30ch07_56000000_62220000_3_254;Score=3.27e-06;Sequence=LEYLNLEENHIGGSLT
SL2.30ch07_56000000_62220000_3	fimo	sequence_feature	60967771	60967818	3.51e-06	+	2	ID=HMM_SL2.30ch07_56000000_62220000_3_255;Name=HMM_SL2.30ch07_56000000_62220000_3_255;Score=3.51e-06;Sequence=LSFLVQHSIHLNFLIP
SL2.30ch07_56000000_62220000_3	fimo	sequence_feature	56529448	56529495	5.12e-06	+	2	ID=HMM_SL2.30ch07_56000000_62220000_3_256;Name=HMM_SL2.30ch07_56000000_62220000_3_256;Score=5.12e-06;Sequence=LCCLNLSRNVLSGVKK
SL2.30ch07_56000000_62220000_3	fimo	sequence_feature	60402367	60402414	5.3e-06	+	2	ID=HMM_SL2.30ch07_56000000_62220000_3_257;Name=HMM_SL2.30ch07_56000000_62220000_3_257;Score=5.3e-06;Sequence=VLKLNSIHNSLSMRID
SL2.30ch07_56000000_62220000_3	fimo	sequence_feature	62070568	62070615	5.67e-06	+	2	ID=HMM_SL2.30ch07_56000000_62220000_3_258;Name=HMM_SL2.30ch07_56000000_62220000_3_258;Score=5.67e-06;Sequence=LARLSLSSLNLARLSP
SL2.30ch07_56000000_62220000_3	fimo	sequence_feature	58497424	58497471	6.47e-06	+	2	ID=HMM_SL2.30ch07_56000000_62220000_3_259;Name=HMM_SL2.30ch07_56000000_62220000_3_259;Score=6.47e-06;Sequence=LANLKANYLSLGGRVP
SL2.30ch07_56000000_62220000_3	fimo	sequence_feature	59336062	59336109	6.68e-06	+	2	ID=HMM_SL2.30ch07_56000000_62220000_3_260;Name=HMM_SL2.30ch07_56000000_62220000_3_260;Score=6.68e-06;Sequence=LLIEDFIHNNLNQQIK
SL2.30ch07_56000000_62220000_3	fimo	sequence_feature	61656088	61656135	7.13e-06	+	2	ID=HMM_SL2.30ch07_56000000_62220000_3_261;Name=HMM_SL2.30ch07_56000000_62220000_3_261;Score=7.13e-06;Sequence=RIDYNLFFIRLNGRII
SL2.30ch07_56000000_62220000_3	fimo	sequence_feature	59287963	59288010	7.6e-06	+	2	ID=HMM_SL2.30ch07_56000000_62220000_3_262;Name=HMM_SL2.30ch07_56000000_62220000_3_262;Score=7.6e-06;Sequence=LVALNLSREKLKLKCY
SL2.30ch07_56000000_62220000_3	fimo	sequence_feature	59384044	59384091	7.6e-06	+	2	ID=HMM_SL2.30ch07_56000000_62220000_3_263;Name=HMM_SL2.30ch07_56000000_62220000_3_263;Score=7.6e-06;Sequence=IIKLNLFRMQLIFKIG
SL2.30ch07_56000000_62220000_3	fimo	sequence_feature	58633318	58633365	9.43e-06	+	2	ID=HMM_SL2.30ch07_56000000_62220000_3_264;Name=HMM_SL2.30ch07_56000000_62220000_3_264;Score=9.43e-06;Sequence=LVTFVLNTIIAIGDIP
SL2.30ch07_56000000_62220000_3	fimo	sequence_feature	60696958	60697005	1e-05	+	2	ID=HMM_SL2.30ch07_56000000_62220000_3_265;Name=HMM_SL2.30ch07_56000000_62220000_3_265;Score=1e-05;Sequence=LIRNYLSDTNLNLLEP
SL2.30ch07_56000000_62220000_3	fimo	sequence_feature	58634920	58634967	1.06e-05	+	2	ID=HMM_SL2.30ch07_56000000_62220000_3_266;Name=HMM_SL2.30ch07_56000000_62220000_3_266;Score=1.06e-05;Sequence=LLLLSLSFLTSTLTIL
SL2.30ch07_56000000_62220000_3	fimo	sequence_feature	59154439	59154486	1.3e-05	+	2	ID=HMM_SL2.30ch07_56000000_62220000_3_267;Name=HMM_SL2.30ch07_56000000_62220000_3_267;Score=1.3e-05;Sequence=NINLNLSNFLNKYLIP
SL2.30ch07_56000000_62220000_3	fimo	sequence_feature	57089461	57089508	1.34e-05	+	2	ID=HMM_SL2.30ch07_56000000_62220000_3_268;Name=HMM_SL2.30ch07_56000000_62220000_3_268;Score=1.34e-05;Sequence=LIVFHLAFPEIHGIIP
SL2.30ch07_56000000_62220000_3	fimo	sequence_feature	56880628	56880675	1.41e-05	+	2	ID=HMM_SL2.30ch07_56000000_62220000_3_269;Name=HMM_SL2.30ch07_56000000_62220000_3_269;Score=1.41e-05;Sequence=LQIQNLNQNLSIMSEP
SL2.30ch07_56000000_62220000_3	fimo	sequence_feature	56787706	56787753	1.49e-05	+	2	ID=HMM_SL2.30ch07_56000000_62220000_3_270;Name=HMM_SL2.30ch07_56000000_62220000_3_270;Score=1.49e-05;Sequence=LGLLSNRGLLLNGKID
SL2.30ch07_56000000_62220000_3	fimo	sequence_feature	59830807	59830854	1.71e-05	+	2	ID=HMM_SL2.30ch07_56000000_62220000_3_271;Name=HMM_SL2.30ch07_56000000_62220000_3_271;Score=1.71e-05;Sequence=VITVDLSNNMFSGTIS
SL2.30ch07_56000000_62220000_3	fimo	sequence_feature	62144803	62144850	1.76e-05	+	2	ID=HMM_SL2.30ch07_56000000_62220000_3_272;Name=HMM_SL2.30ch07_56000000_62220000_3_272;Score=1.76e-05;Sequence=LIQLVLIQNSVSLLTL
SL2.30ch07_56000000_62220000_3	fimo	sequence_feature	60007990	60008037	1.81e-05	+	2	ID=HMM_SL2.30ch07_56000000_62220000_3_273;Name=HMM_SL2.30ch07_56000000_62220000_3_273;Score=1.81e-05;Sequence=LRMLDIFFNNLTFTAL
SL2.30ch07_56000000_62220000_3	fimo	sequence_feature	61111441	61111488	1.86e-05	+	2	ID=HMM_SL2.30ch07_56000000_62220000_3_274;Name=HMM_SL2.30ch07_56000000_62220000_3_274;Score=1.86e-05;Sequence=IISLYLEINNLTWLIP
SL2.30ch07_56000000_62220000_3	fimo	sequence_feature	61074040	61074087	2.13e-05	+	2	ID=HMM_SL2.30ch07_56000000_62220000_3_275;Name=HMM_SL2.30ch07_56000000_62220000_3_275;Score=2.13e-05;Sequence=RHDLNLRYWRLKGGIH
SL2.30ch07_56000000_62220000_3	fimo	sequence_feature	58371178	58371225	2.19e-05	+	2	ID=HMM_SL2.30ch07_56000000_62220000_3_276;Name=HMM_SL2.30ch07_56000000_62220000_3_276;Score=2.19e-05;Sequence=LHTLKPFNNHLFTQIY
SL2.30ch07_56000000_62220000_3	fimo	sequence_feature	61997764	61997811	2.38e-05	+	2	ID=HMM_SL2.30ch07_56000000_62220000_3_277;Name=HMM_SL2.30ch07_56000000_62220000_3_277;Score=2.38e-05;Sequence=LHQLDVSNAFLHGTLD
SL2.30ch07_56000000_62220000_3	fimo	sequence_feature	57040387	57040434	2.59e-05	+	2	ID=HMM_SL2.30ch07_56000000_62220000_3_278;Name=HMM_SL2.30ch07_56000000_62220000_3_278;Score=2.59e-05;Sequence=LILLVTFINNLIIIII
SL2.30ch07_56000000_62220000_3	fimo	sequence_feature	61957480	61957527	2.59e-05	+	2	ID=HMM_SL2.30ch07_56000000_62220000_3_279;Name=HMM_SL2.30ch07_56000000_62220000_3_279;Score=2.59e-05;Sequence=HELLNLSCRNLKLENC
SL2.30ch07_56000000_62220000_3	fimo	sequence_feature	60734101	60734148	2.67e-05	+	2	ID=HMM_SL2.30ch07_56000000_62220000_3_280;Name=HMM_SL2.30ch07_56000000_62220000_3_280;Score=2.67e-05;Sequence=LNVDNEEFNNLSILIC
SL2.30ch07_56000000_62220000_3	fimo	sequence_feature	59088793	59088840	2.82e-05	+	2	ID=HMM_SL2.30ch07_56000000_62220000_3_281;Name=HMM_SL2.30ch07_56000000_62220000_3_281;Score=2.82e-05;Sequence=LYFKYLNQNSDSITIG
SL2.30ch07_56000000_62220000_3	fimo	sequence_feature	59252665	59252712	2.82e-05	+	2	ID=HMM_SL2.30ch07_56000000_62220000_3_282;Name=HMM_SL2.30ch07_56000000_62220000_3_282;Score=2.82e-05;Sequence=LLVNHLIFKKITGQLP
SL2.30ch07_56000000_62220000_3	fimo	sequence_feature	59653483	59653530	2.9e-05	+	2	ID=HMM_SL2.30ch07_56000000_62220000_3_283;Name=HMM_SL2.30ch07_56000000_62220000_3_283;Score=2.9e-05;Sequence=CRRLQLNRNSSQSSIS
SL2.30ch07_56000000_62220000_3	fimo	sequence_feature	59343841	59343888	3.07e-05	+	2	ID=HMM_SL2.30ch07_56000000_62220000_3_284;Name=HMM_SL2.30ch07_56000000_62220000_3_284;Score=3.07e-05;Sequence=LRGLDVCFQMLSCQIP
SL2.30ch07_56000000_62220000_3	fimo	sequence_feature	59388091	59388138	3.16e-05	+	2	ID=HMM_SL2.30ch07_56000000_62220000_3_285;Name=HMM_SL2.30ch07_56000000_62220000_3_285;Score=3.16e-05;Sequence=KTNLNMSTNNIMTRIV
SL2.30ch07_56000000_62220000_3	fimo	sequence_feature	60704824	60704871	3.45e-05	+	2	ID=HMM_SL2.30ch07_56000000_62220000_3_286;Name=HMM_SL2.30ch07_56000000_62220000_3_286;Score=3.45e-05;Sequence=SSIPNLSFNNFTINIK
SL2.30ch07_56000000_62220000_3	fimo	sequence_feature	56879863	56879910	3.56e-05	+	2	ID=HMM_SL2.30ch07_56000000_62220000_3_287;Name=HMM_SL2.30ch07_56000000_62220000_3_287;Score=3.56e-05;Sequence=TCELNLSSNKIKRKIF
SL2.30ch07_56000000_62220000_3	fimo	sequence_feature	58658182	58658229	3.56e-05	+	2	ID=HMM_SL2.30ch07_56000000_62220000_3_288;Name=HMM_SL2.30ch07_56000000_62220000_3_288;Score=3.56e-05;Sequence=RYFLSLSPLDLRQEIP
SL2.30ch07_56000000_62220000_3	fimo	sequence_feature	59212852	59212899	3.56e-05	+	2	ID=HMM_SL2.30ch07_56000000_62220000_3_289;Name=HMM_SL2.30ch07_56000000_62220000_3_289;Score=3.56e-05;Sequence=LLFICLNHISLNFHIL
SL2.30ch07_56000000_62220000_3	fimo	sequence_feature	57981664	57981711	3.89e-05	+	2	ID=HMM_SL2.30ch07_56000000_62220000_3_290;Name=HMM_SL2.30ch07_56000000_62220000_3_290;Score=3.89e-05;Sequence=LVGLNLFLLNSSSTCP
SL2.30ch07_56000000_62220000_3	fimo	sequence_feature	61633558	61633605	3.89e-05	+	2	ID=HMM_SL2.30ch07_56000000_62220000_3_291;Name=HMM_SL2.30ch07_56000000_62220000_3_291;Score=3.89e-05;Sequence=LAVLCSSTFELQIFIP
SL2.30ch07_56000000_62220000_3	fimo	sequence_feature	56274403	56274450	4e-05	+	2	ID=HMM_SL2.30ch07_56000000_62220000_3_292;Name=HMM_SL2.30ch07_56000000_62220000_3_292;Score=4e-05;Sequence=LNIDNEESNNLSILIC
SL2.30ch07_56000000_62220000_3	fimo	sequence_feature	58892536	58892583	4e-05	+	2	ID=HMM_SL2.30ch07_56000000_62220000_3_293;Name=HMM_SL2.30ch07_56000000_62220000_3_293;Score=4e-05;Sequence=LVVLVLNFVSLKKLGK
SL2.30ch07_56000000_62220000_3	fimo	sequence_feature	60701896	60701943	4e-05	+	2	ID=HMM_SL2.30ch07_56000000_62220000_3_294;Name=HMM_SL2.30ch07_56000000_62220000_3_294;Score=4e-05;Sequence=LVHQILSRSLLFGEII
SL2.30ch07_56000000_62220000_3	fimo	sequence_feature	59836219	59836266	4.12e-05	+	2	ID=HMM_SL2.30ch07_56000000_62220000_3_295;Name=HMM_SL2.30ch07_56000000_62220000_3_295;Score=4.12e-05;Sequence=LTLTSLNYHHFVNFIP
SL2.30ch07_56000000_62220000_3	fimo	sequence_feature	56488849	56488896	4.25e-05	+	2	ID=HMM_SL2.30ch07_56000000_62220000_3_296;Name=HMM_SL2.30ch07_56000000_62220000_3_296;Score=4.25e-05;Sequence=LVILNVISNLLMILNG
SL2.30ch07_56000000_62220000_3	fimo	sequence_feature	58835017	58835064	4.25e-05	+	2	ID=HMM_SL2.30ch07_56000000_62220000_3_297;Name=HMM_SL2.30ch07_56000000_62220000_3_297;Score=4.25e-05;Sequence=LLANPLIHNVLAEPRP
SL2.30ch07_56000000_62220000_3	fimo	sequence_feature	60820825	60820872	4.25e-05	+	2	ID=HMM_SL2.30ch07_56000000_62220000_3_298;Name=HMM_SL2.30ch07_56000000_62220000_3_298;Score=4.25e-05;Sequence=LKDINVIRNQVKGHIY
SL2.30ch07_56000000_62220000_3	fimo	sequence_feature	57152803	57152850	4.38e-05	+	2	ID=HMM_SL2.30ch07_56000000_62220000_3_299;Name=HMM_SL2.30ch07_56000000_62220000_3_299;Score=4.38e-05;Sequence=LLLLLLSSPSLHVHKL
SL2.30ch07_56000000_62220000_3	fimo	sequence_feature	56493031	56493078	4.51e-05	+	2	ID=HMM_SL2.30ch07_56000000_62220000_3_300;Name=HMM_SL2.30ch07_56000000_62220000_3_300;Score=4.51e-05;Sequence=LSKLYYFDNFFYEKIP
SL2.30ch07_56000000_62220000_3	fimo	sequence_feature	57768886	57768933	4.51e-05	+	2	ID=HMM_SL2.30ch07_56000000_62220000_3_301;Name=HMM_SL2.30ch07_56000000_62220000_3_301;Score=4.51e-05;Sequence=LVFLDLFLLVIILKIY
SL2.30ch07_56000000_62220000_3	fimo	sequence_feature	57817606	57817653	4.65e-05	+	2	ID=HMM_SL2.30ch07_56000000_62220000_3_302;Name=HMM_SL2.30ch07_56000000_62220000_3_302;Score=4.65e-05;Sequence=LHILLLHFGDCVPMIP
SL2.30ch07_56000000_62220000_3	fimo	sequence_feature	57305218	57305265	4.79e-05	+	2	ID=HMM_SL2.30ch07_56000000_62220000_3_303;Name=HMM_SL2.30ch07_56000000_62220000_3_303;Score=4.79e-05;Sequence=LPLPDLARNSPKSRPP
SL2.30ch07_56000000_62220000_3	fimo	sequence_feature	59089006	59089053	4.94e-05	+	2	ID=HMM_SL2.30ch07_56000000_62220000_3_304;Name=HMM_SL2.30ch07_56000000_62220000_3_304;Score=4.94e-05;Sequence=CQNLNLEFCVLTLTIL
SL2.30ch07_56000000_62220000_3	fimo	sequence_feature	58680424	58680471	5.25e-05	+	2	ID=HMM_SL2.30ch07_56000000_62220000_3_305;Name=HMM_SL2.30ch07_56000000_62220000_3_305;Score=5.25e-05;Sequence=YLLSYLSCNWAIGNIL
SL2.30ch07_56000000_62220000_3	fimo	sequence_feature	61044742	61044789	5.25e-05	+	2	ID=HMM_SL2.30ch07_56000000_62220000_3_306;Name=HMM_SL2.30ch07_56000000_62220000_3_306;Score=5.25e-05;Sequence=LQLYNLFCIQLNRMKM
SL2.30ch07_56000000_62220000_3	fimo	sequence_feature	61112203	61112250	5.25e-05	+	2	ID=HMM_SL2.30ch07_56000000_62220000_3_307;Name=HMM_SL2.30ch07_56000000_62220000_3_307;Score=5.25e-05;Sequence=IIFALLFSNILMGSII
SL2.30ch07_56000000_62220000_3	fimo	sequence_feature	57823462	57823509	5.41e-05	+	2	ID=HMM_SL2.30ch07_56000000_62220000_3_308;Name=HMM_SL2.30ch07_56000000_62220000_3_308;Score=5.41e-05;Sequence=LIDLDSSSYVLWGTPS
SL2.30ch07_56000000_62220000_3	fimo	sequence_feature	58020598	58020645	5.41e-05	+	2	ID=HMM_SL2.30ch07_56000000_62220000_3_309;Name=HMM_SL2.30ch07_56000000_62220000_3_309;Score=5.41e-05;Sequence=LILEVMICNLLQFLIY
SL2.30ch07_56000000_62220000_3	fimo	sequence_feature	61344022	61344069	5.41e-05	+	2	ID=HMM_SL2.30ch07_56000000_62220000_3_310;Name=HMM_SL2.30ch07_56000000_62220000_3_310;Score=5.41e-05;Sequence=ENKKNLNFNGLKLKIC
SL2.30ch07_56000000_62220000_3	fimo	sequence_feature	59546824	59546871	5.75e-05	+	2	ID=HMM_SL2.30ch07_56000000_62220000_3_311;Name=HMM_SL2.30ch07_56000000_62220000_3_311;Score=5.75e-05;Sequence=LLLLLLLWRVLIILIV
SL2.30ch07_56000000_62220000_3	fimo	sequence_feature	61224394	61224441	5.75e-05	+	2	ID=HMM_SL2.30ch07_56000000_62220000_3_312;Name=HMM_SL2.30ch07_56000000_62220000_3_312;Score=5.75e-05;Sequence=KPILHLSSTDLSKTLP
SL2.30ch07_56000000_62220000_3	fimo	sequence_feature	58723039	58723086	5.93e-05	+	2	ID=HMM_SL2.30ch07_56000000_62220000_3_313;Name=HMM_SL2.30ch07_56000000_62220000_3_313;Score=5.93e-05;Sequence=RIIWDLSEPDLTCYIP
SL2.30ch07_56000000_62220000_3	fimo	sequence_feature	62086357	62086404	5.93e-05	+	2	ID=HMM_SL2.30ch07_56000000_62220000_3_314;Name=HMM_SL2.30ch07_56000000_62220000_3_314;Score=5.93e-05;Sequence=SNLVLLFFVSLGKRIP
SL2.30ch07_56000000_62220000_3	fimo	sequence_feature	59313430	59313477	6.11e-05	+	2	ID=HMM_SL2.30ch07_56000000_62220000_3_315;Name=HMM_SL2.30ch07_56000000_62220000_3_315;Score=6.11e-05;Sequence=LSMYNLFYLLKKGEII
SL2.30ch07_56000000_62220000_3	fimo	sequence_feature	61312528	61312575	6.11e-05	+	2	ID=HMM_SL2.30ch07_56000000_62220000_3_316;Name=HMM_SL2.30ch07_56000000_62220000_3_316;Score=6.11e-05;Sequence=SIFLDLLGTDLITMIW
SL2.30ch07_56000000_62220000_3	fimo	sequence_feature	58674616	58674663	6.3e-05	+	2	ID=HMM_SL2.30ch07_56000000_62220000_3_317;Name=HMM_SL2.30ch07_56000000_62220000_3_317;Score=6.3e-05;Sequence=YHNLLSICNSYIGKIY
SL2.30ch07_56000000_62220000_3	fimo	sequence_feature	58531984	58532031	6.49e-05	+	2	ID=HMM_SL2.30ch07_56000000_62220000_3_318;Name=HMM_SL2.30ch07_56000000_62220000_3_318;Score=6.49e-05;Sequence=LIFNNNNNNNNNNNII
SL2.30ch07_56000000_62220000_3	fimo	sequence_feature	59459488	59459535	6.49e-05	+	2	ID=HMM_SL2.30ch07_56000000_62220000_3_319;Name=HMM_SL2.30ch07_56000000_62220000_3_319;Score=6.49e-05;Sequence=LVFLKLQDLQLEVSIF
SL2.30ch07_56000000_62220000_3	fimo	sequence_feature	59831167	59831214	6.49e-05	+	2	ID=HMM_SL2.30ch07_56000000_62220000_3_320;Name=HMM_SL2.30ch07_56000000_62220000_3_320;Score=6.49e-05;Sequence=IIIVILKSNRFSGSIP
SL2.30ch07_56000000_62220000_3	fimo	sequence_feature	56846242	56846289	6.69e-05	+	2	ID=HMM_SL2.30ch07_56000000_62220000_3_321;Name=HMM_SL2.30ch07_56000000_62220000_3_321;Score=6.69e-05;Sequence=LRLLHLRCSECISTIA
SL2.30ch07_56000000_62220000_3	fimo	sequence_feature	60012442	60012489	6.89e-05	+	2	ID=HMM_SL2.30ch07_56000000_62220000_3_322;Name=HMM_SL2.30ch07_56000000_62220000_3_322;Score=6.89e-05;Sequence=SLLLQLAHNGLQWCID
SL2.30ch07_56000000_62220000_3	fimo	sequence_feature	56741551	56741598	7.11e-05	+	2	ID=HMM_SL2.30ch07_56000000_62220000_3_323;Name=HMM_SL2.30ch07_56000000_62220000_3_323;Score=7.11e-05;Sequence=LTKLHNFSNWLNFKCF
SL2.30ch07_56000000_62220000_3	fimo	sequence_feature	61938535	61938582	7.11e-05	+	2	ID=HMM_SL2.30ch07_56000000_62220000_3_324;Name=HMM_SL2.30ch07_56000000_62220000_3_324;Score=7.11e-05;Sequence=LRHKVLNFVILTKDIK
SL2.30ch07_56000000_62220000_3	fimo	sequence_feature	61946296	61946343	7.11e-05	+	2	ID=HMM_SL2.30ch07_56000000_62220000_3_325;Name=HMM_SL2.30ch07_56000000_62220000_3_325;Score=7.11e-05;Sequence=LRHKVLNFVILTKDIK
SL2.30ch07_56000000_62220000_3	fimo	sequence_feature	56856442	56856489	7.32e-05	+	2	ID=HMM_SL2.30ch07_56000000_62220000_3_326;Name=HMM_SL2.30ch07_56000000_62220000_3_326;Score=7.32e-05;Sequence=LEAEVISQNVLTSSSL
SL2.30ch07_56000000_62220000_3	fimo	sequence_feature	58730398	58730445	7.32e-05	+	2	ID=HMM_SL2.30ch07_56000000_62220000_3_327;Name=HMM_SL2.30ch07_56000000_62220000_3_327;Score=7.32e-05;Sequence=LKQTLLNSVELVGRVP
SL2.30ch07_56000000_62220000_3	fimo	sequence_feature	58945024	58945071	7.32e-05	+	2	ID=HMM_SL2.30ch07_56000000_62220000_3_328;Name=HMM_SL2.30ch07_56000000_62220000_3_328;Score=7.32e-05;Sequence=LARLNSLLNHLYHTSP
SL2.30ch07_56000000_62220000_3	fimo	sequence_feature	61382737	61382784	7.54e-05	+	2	ID=HMM_SL2.30ch07_56000000_62220000_3_329;Name=HMM_SL2.30ch07_56000000_62220000_3_329;Score=7.54e-05;Sequence=LIKLQPFLNNKNKKIL
SL2.30ch07_56000000_62220000_3	fimo	sequence_feature	58145305	58145352	7.77e-05	+	2	ID=HMM_SL2.30ch07_56000000_62220000_3_330;Name=HMM_SL2.30ch07_56000000_62220000_3_330;Score=7.77e-05;Sequence=SIIEHHSRNQLIIPIV
SL2.30ch07_56000000_62220000_3	fimo	sequence_feature	58484065	58484112	7.77e-05	+	2	ID=HMM_SL2.30ch07_56000000_62220000_3_331;Name=HMM_SL2.30ch07_56000000_62220000_3_331;Score=7.77e-05;Sequence=LGNLYLTSINSIFKIL
SL2.30ch07_56000000_62220000_3	fimo	sequence_feature	58759045	58759092	7.77e-05	+	2	ID=HMM_SL2.30ch07_56000000_62220000_3_332;Name=HMM_SL2.30ch07_56000000_62220000_3_332;Score=7.77e-05;Sequence=LILLNLFLKDLKTTKI
SL2.30ch07_56000000_62220000_3	fimo	sequence_feature	58989052	58989099	7.77e-05	+	2	ID=HMM_SL2.30ch07_56000000_62220000_3_333;Name=HMM_SL2.30ch07_56000000_62220000_3_333;Score=7.77e-05;Sequence=LTLLQYSSNHQEMLAN
SL2.30ch07_56000000_62220000_3	fimo	sequence_feature	57668419	57668466	8.01e-05	+	2	ID=HMM_SL2.30ch07_56000000_62220000_3_334;Name=HMM_SL2.30ch07_56000000_62220000_3_334;Score=8.01e-05;Sequence=NQTLYLPYNTIHYKIM
SL2.30ch07_56000000_62220000_3	fimo	sequence_feature	57806761	57806808	8.01e-05	+	2	ID=HMM_SL2.30ch07_56000000_62220000_3_335;Name=HMM_SL2.30ch07_56000000_62220000_3_335;Score=8.01e-05;Sequence=WINLTLSRDSLNKSVP
SL2.30ch07_56000000_62220000_3	fimo	sequence_feature	58766923	58766970	8.01e-05	+	2	ID=HMM_SL2.30ch07_56000000_62220000_3_336;Name=HMM_SL2.30ch07_56000000_62220000_3_336;Score=8.01e-05;Sequence=LRVLDLSHLKFKESSE
SL2.30ch07_56000000_62220000_3	fimo	sequence_feature	61487794	61487841	8.01e-05	+	2	ID=HMM_SL2.30ch07_56000000_62220000_3_337;Name=HMM_SL2.30ch07_56000000_62220000_3_337;Score=8.01e-05;Sequence=LTRSPLSSLRLMQLIV
SL2.30ch07_56000000_62220000_3	fimo	sequence_feature	57432832	57432879	8.25e-05	+	2	ID=HMM_SL2.30ch07_56000000_62220000_3_338;Name=HMM_SL2.30ch07_56000000_62220000_3_338;Score=8.25e-05;Sequence=FAFLSLSSNNYQVQNN
SL2.30ch07_56000000_62220000_3	fimo	sequence_feature	61932343	61932390	8.25e-05	+	2	ID=HMM_SL2.30ch07_56000000_62220000_3_339;Name=HMM_SL2.30ch07_56000000_62220000_3_339;Score=8.25e-05;Sequence=LNLINLSTLVLIFSSQ
SL2.30ch07_56000000_62220000_3	fimo	sequence_feature	62069665	62069712	8.25e-05	+	2	ID=HMM_SL2.30ch07_56000000_62220000_3_340;Name=HMM_SL2.30ch07_56000000_62220000_3_340;Score=8.25e-05;Sequence=LEYLYKSFNLENKKVK
SL2.30ch07_56000000_62220000_3	fimo	sequence_feature	58419286	58419333	8.49e-05	+	2	ID=HMM_SL2.30ch07_56000000_62220000_3_341;Name=HMM_SL2.30ch07_56000000_62220000_3_341;Score=8.49e-05;Sequence=LRLSSLSQSLLSYMQL
SL2.30ch07_56000000_62220000_3	fimo	sequence_feature	59894671	59894718	8.49e-05	+	2	ID=HMM_SL2.30ch07_56000000_62220000_3_342;Name=HMM_SL2.30ch07_56000000_62220000_3_342;Score=8.49e-05;Sequence=IENLNLSTSQLIDSKV
SL2.30ch07_56000000_62220000_3	fimo	sequence_feature	59941789	59941836	8.49e-05	+	2	ID=HMM_SL2.30ch07_56000000_62220000_3_343;Name=HMM_SL2.30ch07_56000000_62220000_3_343;Score=8.49e-05;Sequence=LARLSPSSLNLAHLSP
SL2.30ch07_56000000_62220000_3	fimo	sequence_feature	61789405	61789452	8.49e-05	+	2	ID=HMM_SL2.30ch07_56000000_62220000_3_344;Name=HMM_SL2.30ch07_56000000_62220000_3_344;Score=8.49e-05;Sequence=VSHLDISQHLLVCAIN
SL2.30ch07_56000000_62220000_3	fimo	sequence_feature	56286346	56286393	8.75e-05	+	2	ID=HMM_SL2.30ch07_56000000_62220000_3_345;Name=HMM_SL2.30ch07_56000000_62220000_3_345;Score=8.75e-05;Sequence=LNKAALFQTVLIHNHP
SL2.30ch07_56000000_62220000_3	fimo	sequence_feature	57379543	57379590	8.75e-05	+	2	ID=HMM_SL2.30ch07_56000000_62220000_3_346;Name=HMM_SL2.30ch07_56000000_62220000_3_346;Score=8.75e-05;Sequence=KIILNKIWNDHSTMII
SL2.30ch07_56000000_62220000_3	fimo	sequence_feature	59048995	59049042	8.75e-05	+	2	ID=HMM_SL2.30ch07_56000000_62220000_3_347;Name=HMM_SL2.30ch07_56000000_62220000_3_347;Score=8.75e-05;Sequence=NRILNLIRLNLIITSC
SL2.30ch07_56000000_62220000_3	fimo	sequence_feature	59884441	59884488	8.75e-05	+	2	ID=HMM_SL2.30ch07_56000000_62220000_3_348;Name=HMM_SL2.30ch07_56000000_62220000_3_348;Score=8.75e-05;Sequence=LVRLVLLLTSLIGQLL
SL2.30ch07_56000000_62220000_3	fimo	sequence_feature	61787878	61787925	8.75e-05	+	2	ID=HMM_SL2.30ch07_56000000_62220000_3_349;Name=HMM_SL2.30ch07_56000000_62220000_3_349;Score=8.75e-05;Sequence=IGLLVLFHTHVHTNID
SL2.30ch07_56000000_62220000_3	fimo	sequence_feature	56552044	56552091	9.01e-05	+	2	ID=HMM_SL2.30ch07_56000000_62220000_3_350;Name=HMM_SL2.30ch07_56000000_62220000_3_350;Score=9.01e-05;Sequence=LFSASSISNSLHGLPP
SL2.30ch07_56000000_62220000_3	fimo	sequence_feature	60898489	60898536	9.01e-05	+	2	ID=HMM_SL2.30ch07_56000000_62220000_3_351;Name=HMM_SL2.30ch07_56000000_62220000_3_351;Score=9.01e-05;Sequence=LHILYIRYNLWVLHSP
SL2.30ch07_56000000_62220000_3	fimo	sequence_feature	61055521	61055568	9.01e-05	+	2	ID=HMM_SL2.30ch07_56000000_62220000_3_352;Name=HMM_SL2.30ch07_56000000_62220000_3_352;Score=9.01e-05;Sequence=LFLSLLIFNLLNKLIL
SL2.30ch07_56000000_62220000_3	fimo	sequence_feature	56432269	56432316	9.27e-05	+	2	ID=HMM_SL2.30ch07_56000000_62220000_3_353;Name=HMM_SL2.30ch07_56000000_62220000_3_353;Score=9.27e-05;Sequence=VHHLHLIPILLSYHNP
SL2.30ch07_56000000_62220000_3	fimo	sequence_feature	57632482	57632529	9.27e-05	+	2	ID=HMM_SL2.30ch07_56000000_62220000_3_354;Name=HMM_SL2.30ch07_56000000_62220000_3_354;Score=9.27e-05;Sequence=LTPAVLGSNSLVERSF
SL2.30ch07_56000000_62220000_3	fimo	sequence_feature	60731713	60731760	9.27e-05	+	2	ID=HMM_SL2.30ch07_56000000_62220000_3_355;Name=HMM_SL2.30ch07_56000000_62220000_3_355;Score=9.27e-05;Sequence=IWLLYKISNLKFHQIP
SL2.30ch07_56000000_62220000_3	fimo	sequence_feature	57505828	57505875	9.55e-05	+	2	ID=HMM_SL2.30ch07_56000000_62220000_3_356;Name=HMM_SL2.30ch07_56000000_62220000_3_356;Score=9.55e-05;Sequence=WAVLYLSRENLNNLEL
SL2.30ch07_56000000_62220000_3	fimo	sequence_feature	57540148	57540195	9.55e-05	+	2	ID=HMM_SL2.30ch07_56000000_62220000_3_357;Name=HMM_SL2.30ch07_56000000_62220000_3_357;Score=9.55e-05;Sequence=WAVLYLSRENLNHLEL
SL2.30ch07_56000000_62220000_3	fimo	sequence_feature	60504871	60504918	9.55e-05	+	2	ID=HMM_SL2.30ch07_56000000_62220000_3_358;Name=HMM_SL2.30ch07_56000000_62220000_3_358;Score=9.55e-05;Sequence=LLVPRLICNELNGWVY
SL2.30ch07_56000000_62220000_3	fimo	sequence_feature	56279047	56279094	9.82e-05	+	2	ID=HMM_SL2.30ch07_56000000_62220000_3_359;Name=HMM_SL2.30ch07_56000000_62220000_3_359;Score=9.82e-05;Sequence=KLNSEYINNNLHPKIP
SL2.30ch07_56000000_62220000_4	fimo	sequence_feature	61073668	61073715	1.1e-14	-	0	ID=HMM_SL2.30ch07_56000000_62220000_4_360;Name=HMM_SL2.30ch07_56000000_62220000_4_360;Score=1.1e-14;Sequence=LTDLDLSQNSLNGTIP
SL2.30ch07_56000000_62220000_4	fimo	sequence_feature	59348362	59348409	3.47e-14	-	0	ID=HMM_SL2.30ch07_56000000_62220000_4_361;Name=HMM_SL2.30ch07_56000000_62220000_4_361;Score=3.47e-14;Sequence=LNKLNLSNNQLSGMIP
SL2.30ch07_56000000_62220000_4	fimo	sequence_feature	61073596	61073643	2.15e-13	-	0	ID=HMM_SL2.30ch07_56000000_62220000_4_362;Name=HMM_SL2.30ch07_56000000_62220000_4_362;Score=2.15e-13;Sequence=LVTLVLSNNHLTGEIP
SL2.30ch07_56000000_62220000_4	fimo	sequence_feature	59348575	59348622	2.31e-13	-	0	ID=HMM_SL2.30ch07_56000000_62220000_4_363;Name=HMM_SL2.30ch07_56000000_62220000_4_363;Score=2.31e-13;Sequence=LGTLDLSFNELSGKIP
SL2.30ch07_56000000_62220000_4	fimo	sequence_feature	61074640	61074687	3.82e-12	-	0	ID=HMM_SL2.30ch07_56000000_62220000_4_364;Name=HMM_SL2.30ch07_56000000_62220000_4_364;Score=3.82e-12;Sequence=LLYLDLISNVLQGTIP
SL2.30ch07_56000000_62220000_4	fimo	sequence_feature	59348431	59348478	6.64e-10	-	0	ID=HMM_SL2.30ch07_56000000_62220000_4_365;Name=HMM_SL2.30ch07_56000000_62220000_4_365;Score=6.64e-10;Sequence=LNYLDLSGNYFSGEIP
SL2.30ch07_56000000_62220000_4	fimo	sequence_feature	59349007	59349054	1.38e-09	-	0	ID=HMM_SL2.30ch07_56000000_62220000_4_366;Name=HMM_SL2.30ch07_56000000_62220000_4_366;Score=1.38e-09;Sequence=LQYLDVSYNTFSGKIP
SL2.30ch07_56000000_62220000_4	fimo	sequence_feature	59350054	59350101	1.74e-09	-	0	ID=HMM_SL2.30ch07_56000000_62220000_4_367;Name=HMM_SL2.30ch07_56000000_62220000_4_367;Score=1.74e-09;Sequence=LTYLDISQNLIGGTIP
SL2.30ch07_56000000_62220000_4	fimo	sequence_feature	59349151	59349198	3.68e-09	-	0	ID=HMM_SL2.30ch07_56000000_62220000_4_368;Name=HMM_SL2.30ch07_56000000_62220000_4_368;Score=3.68e-09;Sequence=LESLNLFENQFEGLIP
SL2.30ch07_56000000_62220000_4	fimo	sequence_feature	59349220	59349267	3.85e-09	-	0	ID=HMM_SL2.30ch07_56000000_62220000_4_369;Name=HMM_SL2.30ch07_56000000_62220000_4_369;Score=3.85e-09;Sequence=LRRFDVSTNKLNGTIP
SL2.30ch07_56000000_62220000_4	fimo	sequence_feature	59348503	59348550	6.58e-09	-	0	ID=HMM_SL2.30ch07_56000000_62220000_4_370;Name=HMM_SL2.30ch07_56000000_62220000_4_370;Score=6.58e-09;Sequence=LSELDLANNGFSGEIP
SL2.30ch07_56000000_62220000_4	fimo	sequence_feature	61074493	61074540	2.14e-08	-	0	ID=HMM_SL2.30ch07_56000000_62220000_4_371;Name=HMM_SL2.30ch07_56000000_62220000_4_371;Score=2.14e-08;Sequence=LRELDLSLNNFTGDII
SL2.30ch07_56000000_62220000_4	fimo	sequence_feature	59349436	59349483	2.22e-08	-	0	ID=HMM_SL2.30ch07_56000000_62220000_4_372;Name=HMM_SL2.30ch07_56000000_62220000_4_372;Score=2.22e-08;Sequence=LETLWLSMCNLVGSIP
SL2.30ch07_56000000_62220000_4	fimo	sequence_feature	61074259	61074306	3.02e-08	-	0	ID=HMM_SL2.30ch07_56000000_62220000_4_373;Name=HMM_SL2.30ch07_56000000_62220000_4_373;Score=3.02e-08;Sequence=LEDLILVWNQMSGQIP
SL2.30ch07_56000000_62220000_4	fimo	sequence_feature	59349364	59349411	5.55e-08	-	0	ID=HMM_SL2.30ch07_56000000_62220000_4_374;Name=HMM_SL2.30ch07_56000000_62220000_4_374;Score=5.55e-08;Sequence=LTNFDVSNNGLVGSIP
SL2.30ch07_56000000_62220000_4	fimo	sequence_feature	61073875	61073922	1.32e-07	-	0	ID=HMM_SL2.30ch07_56000000_62220000_4_375;Name=HMM_SL2.30ch07_56000000_62220000_4_375;Score=1.32e-07;Sequence=LKNLDFGYNQLRGTVP
SL2.30ch07_56000000_62220000_4	fimo	sequence_feature	59348935	59348982	1.38e-07	-	0	ID=HMM_SL2.30ch07_56000000_62220000_4_376;Name=HMM_SL2.30ch07_56000000_62220000_4_376;Score=1.38e-07;Sequence=LEDLIVIYNSFSGNIP
SL2.30ch07_56000000_62220000_4	fimo	sequence_feature	59348719	59348766	1.75e-07	-	0	ID=HMM_SL2.30ch07_56000000_62220000_4_377;Name=HMM_SL2.30ch07_56000000_62220000_4_377;Score=1.75e-07;Sequence=LSNLQISRNKFSGVIP
SL2.30ch07_56000000_62220000_4	fimo	sequence_feature	59348647	59348694	3.96e-07	-	0	ID=HMM_SL2.30ch07_56000000_62220000_4_378;Name=HMM_SL2.30ch07_56000000_62220000_4_378;Score=3.96e-07;Sequence=LVEFSASHNELTGELP
SL2.30ch07_56000000_62220000_4	fimo	sequence_feature	59598949	59598996	5.51e-07	-	0	ID=HMM_SL2.30ch07_56000000_62220000_4_379;Name=HMM_SL2.30ch07_56000000_62220000_4_379;Score=5.51e-07;Sequence=LHFSNLSPNTLSCHIT
SL2.30ch07_56000000_62220000_4	fimo	sequence_feature	59349583	59349630	6.87e-07	-	0	ID=HMM_SL2.30ch07_56000000_62220000_4_380;Name=HMM_SL2.30ch07_56000000_62220000_4_380;Score=6.87e-07;Sequence=LETLILTENILTGEVP
SL2.30ch07_56000000_62220000_4	fimo	sequence_feature	59349655	59349702	1.55e-06	-	0	ID=HMM_SL2.30ch07_56000000_62220000_4_381;Name=HMM_SL2.30ch07_56000000_62220000_4_381;Score=1.55e-06;Sequence=CRYLDLSGCYFSGNIP
SL2.30ch07_56000000_62220000_4	fimo	sequence_feature	60198142	60198189	2.39e-06	-	0	ID=HMM_SL2.30ch07_56000000_62220000_4_382;Name=HMM_SL2.30ch07_56000000_62220000_4_382;Score=2.39e-06;Sequence=SSFSNLSFSKLVGKHP
SL2.30ch07_56000000_62220000_4	fimo	sequence_feature	56955694	56955741	2.39e-06	-	0	ID=HMM_SL2.30ch07_56000000_62220000_4_383;Name=HMM_SL2.30ch07_56000000_62220000_4_383;Score=2.39e-06;Sequence=LETRSLSHGRLSTKIY
SL2.30ch07_56000000_62220000_4	fimo	sequence_feature	59350198	59350245	3.16e-06	-	0	ID=HMM_SL2.30ch07_56000000_62220000_4_384;Name=HMM_SL2.30ch07_56000000_62220000_4_384;Score=3.16e-06;Sequence=VIAVNLSGASLVGPFP
SL2.30ch07_56000000_62220000_4	fimo	sequence_feature	59349079	59349126	3.51e-06	-	0	ID=HMM_SL2.30ch07_56000000_62220000_4_385;Name=HMM_SL2.30ch07_56000000_62220000_4_385;Score=3.51e-06;Sequence=LYELKLFSNRFSGSLP
SL2.30ch07_56000000_62220000_4	fimo	sequence_feature	61981600	61981647	4.03e-06	-	0	ID=HMM_SL2.30ch07_56000000_62220000_4_386;Name=HMM_SL2.30ch07_56000000_62220000_4_386;Score=4.03e-06;Sequence=LILLHLRYDSLSHQFP
SL2.30ch07_56000000_62220000_4	fimo	sequence_feature	60137806	60137853	5.67e-06	-	0	ID=HMM_SL2.30ch07_56000000_62220000_4_387;Name=HMM_SL2.30ch07_56000000_62220000_4_387;Score=5.67e-06;Sequence=FCFRSLNGNQLTGELP
SL2.30ch07_56000000_62220000_4	fimo	sequence_feature	60757183	60757230	7.84e-06	-	0	ID=HMM_SL2.30ch07_56000000_62220000_4_388;Name=HMM_SL2.30ch07_56000000_62220000_4_388;Score=7.84e-06;Sequence=LQNLCLNTENLSETIS
SL2.30ch07_56000000_62220000_4	fimo	sequence_feature	57125005	57125052	1.06e-05	-	0	ID=HMM_SL2.30ch07_56000000_62220000_4_389;Name=HMM_SL2.30ch07_56000000_62220000_4_389;Score=1.06e-05;Sequence=LLLLSLLHNKYNKSIL
SL2.30ch07_56000000_62220000_4	fimo	sequence_feature	60392188	60392235	1.13e-05	-	0	ID=HMM_SL2.30ch07_56000000_62220000_4_390;Name=HMM_SL2.30ch07_56000000_62220000_4_390;Score=1.13e-05;Sequence=LFHLVDSFQSSFGKIP
SL2.30ch07_56000000_62220000_4	fimo	sequence_feature	60244900	60244947	1.13e-05	-	0	ID=HMM_SL2.30ch07_56000000_62220000_4_391;Name=HMM_SL2.30ch07_56000000_62220000_4_391;Score=1.13e-05;Sequence=LGNLSLFDLHLIRTMQ
SL2.30ch07_56000000_62220000_4	fimo	sequence_feature	57531463	57531510	1.3e-05	-	0	ID=HMM_SL2.30ch07_56000000_62220000_4_392;Name=HMM_SL2.30ch07_56000000_62220000_4_392;Score=1.3e-05;Sequence=LSQLLLAFIQLIGLQI
SL2.30ch07_56000000_62220000_4	fimo	sequence_feature	58330810	58330857	1.34e-05	-	0	ID=HMM_SL2.30ch07_56000000_62220000_4_393;Name=HMM_SL2.30ch07_56000000_62220000_4_393;Score=1.34e-05;Sequence=LNLLVQYHNQLLAPAP
SL2.30ch07_56000000_62220000_4	fimo	sequence_feature	56397160	56397207	1.41e-05	-	0	ID=HMM_SL2.30ch07_56000000_62220000_4_394;Name=HMM_SL2.30ch07_56000000_62220000_4_394;Score=1.41e-05;Sequence=LTLLSTIDPRLEIPTP
SL2.30ch07_56000000_62220000_4	fimo	sequence_feature	60904384	60904431	1.71e-05	-	0	ID=HMM_SL2.30ch07_56000000_62220000_4_395;Name=HMM_SL2.30ch07_56000000_62220000_4_395;Score=1.71e-05;Sequence=LTNLPLSCFYLSGTFL
SL2.30ch07_56000000_62220000_4	fimo	sequence_feature	61084030	61084077	1.76e-05	-	0	ID=HMM_SL2.30ch07_56000000_62220000_4_396;Name=HMM_SL2.30ch07_56000000_62220000_4_396;Score=1.76e-05;Sequence=LNRRNLAGNKREDKIR
SL2.30ch07_56000000_62220000_4	fimo	sequence_feature	56279515	56279562	1.81e-05	-	0	ID=HMM_SL2.30ch07_56000000_62220000_4_397;Name=HMM_SL2.30ch07_56000000_62220000_4_397;Score=1.81e-05;Sequence=SWLLNVETNSLVRDIQ
SL2.30ch07_56000000_62220000_4	fimo	sequence_feature	59373355	59373402	1.86e-05	-	0	ID=HMM_SL2.30ch07_56000000_62220000_4_398;Name=HMM_SL2.30ch07_56000000_62220000_4_398;Score=1.86e-05;Sequence=LQILHLSEIQLSAAVY
SL2.30ch07_56000000_62220000_4	fimo	sequence_feature	57533872	57533919	1.86e-05	-	0	ID=HMM_SL2.30ch07_56000000_62220000_4_399;Name=HMM_SL2.30ch07_56000000_62220000_4_399;Score=1.86e-05;Sequence=LLLLFLSKNKLMRFIN
SL2.30ch07_56000000_62220000_4	fimo	sequence_feature	60138130	60138177	1.91e-05	-	0	ID=HMM_SL2.30ch07_56000000_62220000_4_400;Name=HMM_SL2.30ch07_56000000_62220000_4_400;Score=1.91e-05;Sequence=FCGRDLSNNHIGGTFP
SL2.30ch07_56000000_62220000_4	fimo	sequence_feature	59350126	59350173	2.13e-05	-	0	ID=HMM_SL2.30ch07_56000000_62220000_4_401;Name=HMM_SL2.30ch07_56000000_62220000_4_401;Score=2.13e-05;Sequence=LSSLSLSNNFINSTLP
SL2.30ch07_56000000_62220000_4	fimo	sequence_feature	56412955	56413002	2.13e-05	-	0	ID=HMM_SL2.30ch07_56000000_62220000_4_402;Name=HMM_SL2.30ch07_56000000_62220000_4_402;Score=2.13e-05;Sequence=QVRLSSFQYSLNGLIR
SL2.30ch07_56000000_62220000_4	fimo	sequence_feature	61402021	61402068	2.19e-05	-	0	ID=HMM_SL2.30ch07_56000000_62220000_4_403;Name=HMM_SL2.30ch07_56000000_62220000_4_403;Score=2.19e-05;Sequence=SFTLNLPFVSLEFSIP
SL2.30ch07_56000000_62220000_4	fimo	sequence_feature	60418255	60418302	2.26e-05	-	0	ID=HMM_SL2.30ch07_56000000_62220000_4_404;Name=HMM_SL2.30ch07_56000000_62220000_4_404;Score=2.26e-05;Sequence=LRRLSPFFLSLSPLIC
SL2.30ch07_56000000_62220000_4	fimo	sequence_feature	59237380	59237427	2.26e-05	-	0	ID=HMM_SL2.30ch07_56000000_62220000_4_405;Name=HMM_SL2.30ch07_56000000_62220000_4_405;Score=2.26e-05;Sequence=FTTKNLFYNSLTFKDV
SL2.30ch07_56000000_62220000_4	fimo	sequence_feature	58530223	58530270	2.26e-05	-	0	ID=HMM_SL2.30ch07_56000000_62220000_4_406;Name=HMM_SL2.30ch07_56000000_62220000_4_406;Score=2.26e-05;Sequence=PNDLNLHMNSLIQLIF
SL2.30ch07_56000000_62220000_4	fimo	sequence_feature	59349292	59349339	2.38e-05	-	0	ID=HMM_SL2.30ch07_56000000_62220000_4_407;Name=HMM_SL2.30ch07_56000000_62220000_4_407;Score=2.38e-05;Sequence=IVQIELYNNSLTGKLP
SL2.30ch07_56000000_62220000_4	fimo	sequence_feature	59162920	59162967	2.52e-05	-	0	ID=HMM_SL2.30ch07_56000000_62220000_4_408;Name=HMM_SL2.30ch07_56000000_62220000_4_408;Score=2.52e-05;Sequence=LNLLVLSYYILIYKNR
SL2.30ch07_56000000_62220000_4	fimo	sequence_feature	61149472	61149519	2.59e-05	-	0	ID=HMM_SL2.30ch07_56000000_62220000_4_409;Name=HMM_SL2.30ch07_56000000_62220000_4_409;Score=2.59e-05;Sequence=LPFLNLFSSHLQNRSG
SL2.30ch07_56000000_62220000_4	fimo	sequence_feature	56363482	56363529	2.59e-05	-	0	ID=HMM_SL2.30ch07_56000000_62220000_4_410;Name=HMM_SL2.30ch07_56000000_62220000_4_410;Score=2.59e-05;Sequence=LCELNSSFNQLGCHVC
SL2.30ch07_56000000_62220000_4	fimo	sequence_feature	61112137	61112184	2.67e-05	-	0	ID=HMM_SL2.30ch07_56000000_62220000_4_411;Name=HMM_SL2.30ch07_56000000_62220000_4_411;Score=2.67e-05;Sequence=LYIFLLSFNTLNCEII
SL2.30ch07_56000000_62220000_4	fimo	sequence_feature	59348791	59348838	2.74e-05	-	0	ID=HMM_SL2.30ch07_56000000_62220000_4_412;Name=HMM_SL2.30ch07_56000000_62220000_4_412;Score=2.74e-05;Sequence=VYLLDLFGNAFSGNIS
SL2.30ch07_56000000_62220000_4	fimo	sequence_feature	57030559	57030606	2.74e-05	-	0	ID=HMM_SL2.30ch07_56000000_62220000_4_413;Name=HMM_SL2.30ch07_56000000_62220000_4_413;Score=2.74e-05;Sequence=LSNLVCSTNEQECSIY
SL2.30ch07_56000000_62220000_4	fimo	sequence_feature	60631294	60631341	3.16e-05	-	0	ID=HMM_SL2.30ch07_56000000_62220000_4_414;Name=HMM_SL2.30ch07_56000000_62220000_4_414;Score=3.16e-05;Sequence=LTFLSLQDNNKVCMHI
SL2.30ch07_56000000_62220000_4	fimo	sequence_feature	59588473	59588520	3.26e-05	-	0	ID=HMM_SL2.30ch07_56000000_62220000_4_415;Name=HMM_SL2.30ch07_56000000_62220000_4_415;Score=3.26e-05;Sequence=LENLDHSSLANISLIP
SL2.30ch07_56000000_62220000_4	fimo	sequence_feature	58024180	58024227	3.26e-05	-	0	ID=HMM_SL2.30ch07_56000000_62220000_4_416;Name=HMM_SL2.30ch07_56000000_62220000_4_416;Score=3.26e-05;Sequence=LLLLDSLHIHLNILIY
SL2.30ch07_56000000_62220000_4	fimo	sequence_feature	56937733	56937780	3.26e-05	-	0	ID=HMM_SL2.30ch07_56000000_62220000_4_417;Name=HMM_SL2.30ch07_56000000_62220000_4_417;Score=3.26e-05;Sequence=LTILNFSWFNEKLLIF
SL2.30ch07_56000000_62220000_4	fimo	sequence_feature	56767291	56767338	3.26e-05	-	0	ID=HMM_SL2.30ch07_56000000_62220000_4_418;Name=HMM_SL2.30ch07_56000000_62220000_4_418;Score=3.26e-05;Sequence=FQFLDLFHIMLNFSVP
SL2.30ch07_56000000_62220000_4	fimo	sequence_feature	58790197	58790244	3.35e-05	-	0	ID=HMM_SL2.30ch07_56000000_62220000_4_419;Name=HMM_SL2.30ch07_56000000_62220000_4_419;Score=3.35e-05;Sequence=MHFLEYNCSNLHFTIP
SL2.30ch07_56000000_62220000_4	fimo	sequence_feature	57516673	57516720	3.35e-05	-	0	ID=HMM_SL2.30ch07_56000000_62220000_4_420;Name=HMM_SL2.30ch07_56000000_62220000_4_420;Score=3.35e-05;Sequence=QLVLLLHDNNLHGKVM
SL2.30ch07_56000000_62220000_4	fimo	sequence_feature	61506082	61506129	3.45e-05	-	0	ID=HMM_SL2.30ch07_56000000_62220000_4_421;Name=HMM_SL2.30ch07_56000000_62220000_4_421;Score=3.45e-05;Sequence=LSLLNCSQFFVGGLIS
SL2.30ch07_56000000_62220000_4	fimo	sequence_feature	61636441	61636488	3.56e-05	-	0	ID=HMM_SL2.30ch07_56000000_62220000_4_422;Name=HMM_SL2.30ch07_56000000_62220000_4_422;Score=3.56e-05;Sequence=LAYLNFMYQSLEFSIT
SL2.30ch07_56000000_62220000_4	fimo	sequence_feature	61073743	61073790	3.56e-05	-	0	ID=HMM_SL2.30ch07_56000000_62220000_4_423;Name=HMM_SL2.30ch07_56000000_62220000_4_423;Score=3.56e-05;Sequence=VVWISLSNNSFSGPVP
SL2.30ch07_56000000_62220000_4	fimo	sequence_feature	57427513	57427560	3.56e-05	-	0	ID=HMM_SL2.30ch07_56000000_62220000_4_424;Name=HMM_SL2.30ch07_56000000_62220000_4_424;Score=3.56e-05;Sequence=LNGLNLNDSHSDLKIK
SL2.30ch07_56000000_62220000_4	fimo	sequence_feature	58740445	58740492	3.66e-05	-	0	ID=HMM_SL2.30ch07_56000000_62220000_4_425;Name=HMM_SL2.30ch07_56000000_62220000_4_425;Score=3.66e-05;Sequence=PSLLSVSLNHQSGLEP
SL2.30ch07_56000000_62220000_4	fimo	sequence_feature	62116045	62116092	3.77e-05	-	0	ID=HMM_SL2.30ch07_56000000_62220000_4_426;Name=HMM_SL2.30ch07_56000000_62220000_4_426;Score=3.77e-05;Sequence=LIRSSLIWNKGNTLIE
SL2.30ch07_56000000_62220000_4	fimo	sequence_feature	58816570	58816617	3.77e-05	-	0	ID=HMM_SL2.30ch07_56000000_62220000_4_427;Name=HMM_SL2.30ch07_56000000_62220000_4_427;Score=3.77e-05;Sequence=LINLFLSSNKTNKFIF
SL2.30ch07_56000000_62220000_4	fimo	sequence_feature	61408360	61408407	3.89e-05	-	0	ID=HMM_SL2.30ch07_56000000_62220000_4_428;Name=HMM_SL2.30ch07_56000000_62220000_4_428;Score=3.89e-05;Sequence=RWTQYLSFNRLRMMLY
SL2.30ch07_56000000_62220000_4	fimo	sequence_feature	57149083	57149130	3.89e-05	-	0	ID=HMM_SL2.30ch07_56000000_62220000_4_429;Name=HMM_SL2.30ch07_56000000_62220000_4_429;Score=3.89e-05;Sequence=LVLLSLISISLSKSLI
SL2.30ch07_56000000_62220000_4	fimo	sequence_feature	58947859	58947906	4e-05	-	0	ID=HMM_SL2.30ch07_56000000_62220000_4_430;Name=HMM_SL2.30ch07_56000000_62220000_4_430;Score=4e-05;Sequence=TAVLDLFYQFLIISPP
SL2.30ch07_56000000_62220000_4	fimo	sequence_feature	58882951	58882998	4e-05	-	0	ID=HMM_SL2.30ch07_56000000_62220000_4_431;Name=HMM_SL2.30ch07_56000000_62220000_4_431;Score=4e-05;Sequence=LLLLKKSHCHLQQLIK
SL2.30ch07_56000000_62220000_4	fimo	sequence_feature	57599209	57599256	4.12e-05	-	0	ID=HMM_SL2.30ch07_56000000_62220000_4_432;Name=HMM_SL2.30ch07_56000000_62220000_4_432;Score=4.12e-05;Sequence=YTYLSLLNNFLISQIY
SL2.30ch07_56000000_62220000_4	fimo	sequence_feature	58145431	58145478	4.51e-05	-	0	ID=HMM_SL2.30ch07_56000000_62220000_4_433;Name=HMM_SL2.30ch07_56000000_62220000_4_433;Score=4.51e-05;Sequence=LVVFVLECSSLPGKII
SL2.30ch07_56000000_62220000_4	fimo	sequence_feature	58113748	58113795	4.51e-05	-	0	ID=HMM_SL2.30ch07_56000000_62220000_4_434;Name=HMM_SL2.30ch07_56000000_62220000_4_434;Score=4.51e-05;Sequence=LEHLQLNYIIGSGHLS
SL2.30ch07_56000000_62220000_4	fimo	sequence_feature	60137500	60137547	4.65e-05	-	0	ID=HMM_SL2.30ch07_56000000_62220000_4_435;Name=HMM_SL2.30ch07_56000000_62220000_4_435;Score=4.65e-05;Sequence=LIFRHVQNNQLSGTLD
SL2.30ch07_56000000_62220000_4	fimo	sequence_feature	57670735	57670782	4.65e-05	-	0	ID=HMM_SL2.30ch07_56000000_62220000_4_436;Name=HMM_SL2.30ch07_56000000_62220000_4_436;Score=4.65e-05;Sequence=LYLLQLAVNRLVAMET
SL2.30ch07_56000000_62220000_4	fimo	sequence_feature	56570272	56570319	4.65e-05	-	0	ID=HMM_SL2.30ch07_56000000_62220000_4_437;Name=HMM_SL2.30ch07_56000000_62220000_4_437;Score=4.65e-05;Sequence=STLLSLIWNILGVGIM
SL2.30ch07_56000000_62220000_4	fimo	sequence_feature	59657566	59657613	4.79e-05	-	0	ID=HMM_SL2.30ch07_56000000_62220000_4_438;Name=HMM_SL2.30ch07_56000000_62220000_4_438;Score=4.79e-05;Sequence=SNNLSLIFWDLILLIC
SL2.30ch07_56000000_62220000_4	fimo	sequence_feature	59546527	59546574	4.79e-05	-	0	ID=HMM_SL2.30ch07_56000000_62220000_4_439;Name=HMM_SL2.30ch07_56000000_62220000_4_439;Score=4.79e-05;Sequence=FSFFFLMFNDLIGLIF
SL2.30ch07_56000000_62220000_4	fimo	sequence_feature	56844739	56844786	4.79e-05	-	0	ID=HMM_SL2.30ch07_56000000_62220000_4_440;Name=HMM_SL2.30ch07_56000000_62220000_4_440;Score=4.79e-05;Sequence=LFMLHLISNHLEPQLN
SL2.30ch07_56000000_62220000_4	fimo	sequence_feature	61424614	61424661	4.94e-05	-	0	ID=HMM_SL2.30ch07_56000000_62220000_4_441;Name=HMM_SL2.30ch07_56000000_62220000_4_441;Score=4.94e-05;Sequence=LARLKLGKGNLKIKIM
SL2.30ch07_56000000_62220000_4	fimo	sequence_feature	58745221	58745268	4.94e-05	-	0	ID=HMM_SL2.30ch07_56000000_62220000_4_442;Name=HMM_SL2.30ch07_56000000_62220000_4_442;Score=4.94e-05;Sequence=LEVLNLKFFTSKSKIL
SL2.30ch07_56000000_62220000_4	fimo	sequence_feature	57382234	57382281	4.94e-05	-	0	ID=HMM_SL2.30ch07_56000000_62220000_4_443;Name=HMM_SL2.30ch07_56000000_62220000_4_443;Score=4.94e-05;Sequence=LSLLGQEANLLEGLGP
SL2.30ch07_56000000_62220000_4	fimo	sequence_feature	56776354	56776401	4.94e-05	-	0	ID=HMM_SL2.30ch07_56000000_62220000_4_444;Name=HMM_SL2.30ch07_56000000_62220000_4_444;Score=4.94e-05;Sequence=MNILSISYNHQKQKII
SL2.30ch07_56000000_62220000_4	fimo	sequence_feature	60087745	60087792	5.09e-05	-	0	ID=HMM_SL2.30ch07_56000000_62220000_4_445;Name=HMM_SL2.30ch07_56000000_62220000_4_445;Score=5.09e-05;Sequence=LISLKLIYVNLVTNKP
SL2.30ch07_56000000_62220000_4	fimo	sequence_feature	58882678	58882725	5.09e-05	-	0	ID=HMM_SL2.30ch07_56000000_62220000_4_446;Name=HMM_SL2.30ch07_56000000_62220000_4_446;Score=5.09e-05;Sequence=KEFLSNFDNNGHQHVP
SL2.30ch07_56000000_62220000_4	fimo	sequence_feature	56261551	56261598	5.09e-05	-	0	ID=HMM_SL2.30ch07_56000000_62220000_4_447;Name=HMM_SL2.30ch07_56000000_62220000_4_447;Score=5.09e-05;Sequence=LTITVLSLNSFKQNIE
SL2.30ch07_56000000_62220000_4	fimo	sequence_feature	61074331	61074378	5.25e-05	-	0	ID=HMM_SL2.30ch07_56000000_62220000_4_448;Name=HMM_SL2.30ch07_56000000_62220000_4_448;Score=5.25e-05;Sequence=LKYIELRKNSFVGMIP
SL2.30ch07_56000000_62220000_4	fimo	sequence_feature	57568990	57569037	5.25e-05	-	0	ID=HMM_SL2.30ch07_56000000_62220000_4_449;Name=HMM_SL2.30ch07_56000000_62220000_4_449;Score=5.25e-05;Sequence=NQQLYSSNNSLIFHLI
SL2.30ch07_56000000_62220000_4	fimo	sequence_feature	56351119	56351166	5.25e-05	-	0	ID=HMM_SL2.30ch07_56000000_62220000_4_450;Name=HMM_SL2.30ch07_56000000_62220000_4_450;Score=5.25e-05;Sequence=LTQLNQQSIKAIQSIP
SL2.30ch07_56000000_62220000_4	fimo	sequence_feature	61187926	61187973	5.41e-05	-	0	ID=HMM_SL2.30ch07_56000000_62220000_4_451;Name=HMM_SL2.30ch07_56000000_62220000_4_451;Score=5.41e-05;Sequence=HNSLFLSHGNVSIMIP
SL2.30ch07_56000000_62220000_4	fimo	sequence_feature	60762184	60762231	5.41e-05	-	0	ID=HMM_SL2.30ch07_56000000_62220000_4_452;Name=HMM_SL2.30ch07_56000000_62220000_4_452;Score=5.41e-05;Sequence=LEILVLSGCSKLRTFP
SL2.30ch07_56000000_62220000_4	fimo	sequence_feature	57577828	57577875	5.41e-05	-	0	ID=HMM_SL2.30ch07_56000000_62220000_4_453;Name=HMM_SL2.30ch07_56000000_62220000_4_453;Score=5.41e-05;Sequence=LQVLNFSNSSLSHQFL
SL2.30ch07_56000000_62220000_4	fimo	sequence_feature	57542989	57543036	5.41e-05	-	0	ID=HMM_SL2.30ch07_56000000_62220000_4_454;Name=HMM_SL2.30ch07_56000000_62220000_4_454;Score=5.41e-05;Sequence=LQVLNFSNSSLSHQFL
SL2.30ch07_56000000_62220000_4	fimo	sequence_feature	57508624	57508671	5.41e-05	-	0	ID=HMM_SL2.30ch07_56000000_62220000_4_455;Name=HMM_SL2.30ch07_56000000_62220000_4_455;Score=5.41e-05;Sequence=LQVLNFSNSSLSHQFL
SL2.30ch07_56000000_62220000_4	fimo	sequence_feature	60513313	60513360	5.58e-05	-	0	ID=HMM_SL2.30ch07_56000000_62220000_4_456;Name=HMM_SL2.30ch07_56000000_62220000_4_456;Score=5.58e-05;Sequence=LNLFELFHGSLHGLRQ
SL2.30ch07_56000000_62220000_4	fimo	sequence_feature	59616505	59616552	5.58e-05	-	0	ID=HMM_SL2.30ch07_56000000_62220000_4_457;Name=HMM_SL2.30ch07_56000000_62220000_4_457;Score=5.58e-05;Sequence=LTYLSYLFDSCKKTIP
SL2.30ch07_56000000_62220000_4	fimo	sequence_feature	57240511	57240558	5.58e-05	-	0	ID=HMM_SL2.30ch07_56000000_62220000_4_458;Name=HMM_SL2.30ch07_56000000_62220000_4_458;Score=5.58e-05;Sequence=TPQCQYSCNRLQESIP
SL2.30ch07_56000000_62220000_4	fimo	sequence_feature	60772084	60772131	5.75e-05	-	0	ID=HMM_SL2.30ch07_56000000_62220000_4_459;Name=HMM_SL2.30ch07_56000000_62220000_4_459;Score=5.75e-05;Sequence=WGRLYLSTNGTILTIS
SL2.30ch07_56000000_62220000_4	fimo	sequence_feature	58074301	58074348	5.75e-05	-	0	ID=HMM_SL2.30ch07_56000000_62220000_4_460;Name=HMM_SL2.30ch07_56000000_62220000_4_460;Score=5.75e-05;Sequence=VERLNFIYFTLFGKII
SL2.30ch07_56000000_62220000_4	fimo	sequence_feature	57846469	57846516	5.75e-05	-	0	ID=HMM_SL2.30ch07_56000000_62220000_4_461;Name=HMM_SL2.30ch07_56000000_62220000_4_461;Score=5.75e-05;Sequence=LQLYSLSQISQSYKIE
SL2.30ch07_56000000_62220000_4	fimo	sequence_feature	59539915	59539962	5.93e-05	-	0	ID=HMM_SL2.30ch07_56000000_62220000_4_462;Name=HMM_SL2.30ch07_56000000_62220000_4_462;Score=5.93e-05;Sequence=LQGLQLSLPRISCPCP
SL2.30ch07_56000000_62220000_4	fimo	sequence_feature	57421801	57421848	6.3e-05	-	0	ID=HMM_SL2.30ch07_56000000_62220000_4_463;Name=HMM_SL2.30ch07_56000000_62220000_4_463;Score=6.3e-05;Sequence=SHFLVLFQLLLFSTQP
SL2.30ch07_56000000_62220000_4	fimo	sequence_feature	56784211	56784258	6.3e-05	-	0	ID=HMM_SL2.30ch07_56000000_62220000_4_464;Name=HMM_SL2.30ch07_56000000_62220000_4_464;Score=6.3e-05;Sequence=LTTLVLSHIRGIALMW
SL2.30ch07_56000000_62220000_4	fimo	sequence_feature	61799875	61799922	6.49e-05	-	0	ID=HMM_SL2.30ch07_56000000_62220000_4_465;Name=HMM_SL2.30ch07_56000000_62220000_4_465;Score=6.49e-05;Sequence=IERLNDNNNDLIGFGE
SL2.30ch07_56000000_62220000_4	fimo	sequence_feature	61967374	61967421	6.69e-05	-	0	ID=HMM_SL2.30ch07_56000000_62220000_4_466;Name=HMM_SL2.30ch07_56000000_62220000_4_466;Score=6.69e-05;Sequence=WAVLDNSRNLSSANLP
SL2.30ch07_56000000_62220000_4	fimo	sequence_feature	58693924	58693971	6.69e-05	-	0	ID=HMM_SL2.30ch07_56000000_62220000_4_467;Name=HMM_SL2.30ch07_56000000_62220000_4_467;Score=6.69e-05;Sequence=LPVLQLSCDSSRAQID
SL2.30ch07_56000000_62220000_4	fimo	sequence_feature	58124122	58124169	6.69e-05	-	0	ID=HMM_SL2.30ch07_56000000_62220000_4_468;Name=HMM_SL2.30ch07_56000000_62220000_4_468;Score=6.69e-05;Sequence=VHIFHLFSNHLKGIKE
SL2.30ch07_56000000_62220000_4	fimo	sequence_feature	58087684	58087731	6.69e-05	-	0	ID=HMM_SL2.30ch07_56000000_62220000_4_469;Name=HMM_SL2.30ch07_56000000_62220000_4_469;Score=6.69e-05;Sequence=LELCILLANHLSVHII
SL2.30ch07_56000000_62220000_4	fimo	sequence_feature	57103138	57103185	6.69e-05	-	0	ID=HMM_SL2.30ch07_56000000_62220000_4_470;Name=HMM_SL2.30ch07_56000000_62220000_4_470;Score=6.69e-05;Sequence=LHELNAGQWSTSLPIV
SL2.30ch07_56000000_62220000_4	fimo	sequence_feature	60776821	60776868	7.11e-05	-	0	ID=HMM_SL2.30ch07_56000000_62220000_4_471;Name=HMM_SL2.30ch07_56000000_62220000_4_471;Score=7.11e-05;Sequence=LQNLCLNTENLSEIIS
SL2.30ch07_56000000_62220000_4	fimo	sequence_feature	60699700	60699747	7.11e-05	-	0	ID=HMM_SL2.30ch07_56000000_62220000_4_472;Name=HMM_SL2.30ch07_56000000_62220000_4_472;Score=7.11e-05;Sequence=VIYLNLSSIELFGSCV
SL2.30ch07_56000000_62220000_4	fimo	sequence_feature	59758675	59758722	7.11e-05	-	0	ID=HMM_SL2.30ch07_56000000_62220000_4_473;Name=HMM_SL2.30ch07_56000000_62220000_4_473;Score=7.11e-05;Sequence=KRFQGLGFNSLIMLIL
SL2.30ch07_56000000_62220000_4	fimo	sequence_feature	59630353	59630400	7.32e-05	-	0	ID=HMM_SL2.30ch07_56000000_62220000_4_474;Name=HMM_SL2.30ch07_56000000_62220000_4_474;Score=7.32e-05;Sequence=MARVNEGYNRLVEKLP
SL2.30ch07_56000000_62220000_4	fimo	sequence_feature	62019334	62019381	7.54e-05	-	0	ID=HMM_SL2.30ch07_56000000_62220000_4_475;Name=HMM_SL2.30ch07_56000000_62220000_4_475;Score=7.54e-05;Sequence=QNHLVLSYNKIQFKVK
SL2.30ch07_56000000_62220000_4	fimo	sequence_feature	60137434	60137481	7.54e-05	-	0	ID=HMM_SL2.30ch07_56000000_62220000_4_476;Name=HMM_SL2.30ch07_56000000_62220000_4_476;Score=7.54e-05;Sequence=LADLYSSSLLLTQILP
SL2.30ch07_56000000_62220000_4	fimo	sequence_feature	59711050	59711097	7.54e-05	-	0	ID=HMM_SL2.30ch07_56000000_62220000_4_477;Name=HMM_SL2.30ch07_56000000_62220000_4_477;Score=7.54e-05;Sequence=LASLHLSWSPLSPCIC
SL2.30ch07_56000000_62220000_4	fimo	sequence_feature	58495894	58495941	7.54e-05	-	0	ID=HMM_SL2.30ch07_56000000_62220000_4_478;Name=HMM_SL2.30ch07_56000000_62220000_4_478;Score=7.54e-05;Sequence=LHPLWLGSNQKKGNSE
SL2.30ch07_56000000_62220000_4	fimo	sequence_feature	61171030	61171077	7.77e-05	-	0	ID=HMM_SL2.30ch07_56000000_62220000_4_479;Name=HMM_SL2.30ch07_56000000_62220000_4_479;Score=7.77e-05;Sequence=LIKLYISPNQREGDYL
SL2.30ch07_56000000_62220000_4	fimo	sequence_feature	58191391	58191438	8.01e-05	-	0	ID=HMM_SL2.30ch07_56000000_62220000_4_480;Name=HMM_SL2.30ch07_56000000_62220000_4_480;Score=8.01e-05;Sequence=IVFLVLTWWHLGKLFP
SL2.30ch07_56000000_62220000_4	fimo	sequence_feature	57571693	57571740	8.01e-05	-	0	ID=HMM_SL2.30ch07_56000000_62220000_4_481;Name=HMM_SL2.30ch07_56000000_62220000_4_481;Score=8.01e-05;Sequence=LTLLVLSHMRGMMLMW
SL2.30ch07_56000000_62220000_4	fimo	sequence_feature	61845502	61845549	8.25e-05	-	0	ID=HMM_SL2.30ch07_56000000_62220000_4_482;Name=HMM_SL2.30ch07_56000000_62220000_4_482;Score=8.25e-05;Sequence=MLVLSQSHNHIHASIQ
SL2.30ch07_56000000_62220000_4	fimo	sequence_feature	57563239	57563286	8.25e-05	-	0	ID=HMM_SL2.30ch07_56000000_62220000_4_483;Name=HMM_SL2.30ch07_56000000_62220000_4_483;Score=8.25e-05;Sequence=RALLYSSSLLLTSTIS
SL2.30ch07_56000000_62220000_4	fimo	sequence_feature	57527638	57527685	8.25e-05	-	0	ID=HMM_SL2.30ch07_56000000_62220000_4_484;Name=HMM_SL2.30ch07_56000000_62220000_4_484;Score=8.25e-05;Sequence=RALLYSSSLLLTSTIS
SL2.30ch07_56000000_62220000_4	fimo	sequence_feature	60602407	60602454	8.49e-05	-	0	ID=HMM_SL2.30ch07_56000000_62220000_4_485;Name=HMM_SL2.30ch07_56000000_62220000_4_485;Score=8.49e-05;Sequence=LSWLLLNSWLLPGSIL
SL2.30ch07_56000000_62220000_4	fimo	sequence_feature	57795079	57795126	8.49e-05	-	0	ID=HMM_SL2.30ch07_56000000_62220000_4_486;Name=HMM_SL2.30ch07_56000000_62220000_4_486;Score=8.49e-05;Sequence=LPPLNLGRPLLVNSQP
SL2.30ch07_56000000_62220000_4	fimo	sequence_feature	61551961	61552008	8.75e-05	-	0	ID=HMM_SL2.30ch07_56000000_62220000_4_487;Name=HMM_SL2.30ch07_56000000_62220000_4_487;Score=8.75e-05;Sequence=LIQLNNVNKTLVIEIL
SL2.30ch07_56000000_62220000_4	fimo	sequence_feature	61069849	61069896	8.75e-05	-	0	ID=HMM_SL2.30ch07_56000000_62220000_4_488;Name=HMM_SL2.30ch07_56000000_62220000_4_488;Score=8.75e-05;Sequence=LRTLSLSHRSNKMNEK
SL2.30ch07_56000000_62220000_4	fimo	sequence_feature	57074536	57074583	8.75e-05	-	0	ID=HMM_SL2.30ch07_56000000_62220000_4_489;Name=HMM_SL2.30ch07_56000000_62220000_4_489;Score=8.75e-05;Sequence=LLLLQLHNNNPEFPNL
SL2.30ch07_56000000_62220000_4	fimo	sequence_feature	60742336	60742383	9.01e-05	-	0	ID=HMM_SL2.30ch07_56000000_62220000_4_490;Name=HMM_SL2.30ch07_56000000_62220000_4_490;Score=9.01e-05;Sequence=YISLSYFHNLLILTIK
SL2.30ch07_56000000_62220000_4	fimo	sequence_feature	61565518	61565565	9.27e-05	-	0	ID=HMM_SL2.30ch07_56000000_62220000_4_491;Name=HMM_SL2.30ch07_56000000_62220000_4_491;Score=9.27e-05;Sequence=LLLLVQKQNQKSKLIG
SL2.30ch07_56000000_62220000_4	fimo	sequence_feature	61535551	61535598	9.27e-05	-	0	ID=HMM_SL2.30ch07_56000000_62220000_4_492;Name=HMM_SL2.30ch07_56000000_62220000_4_492;Score=9.27e-05;Sequence=GLQLQLNYNYCIIKIF
SL2.30ch07_56000000_62220000_4	fimo	sequence_feature	57469036	57469083	9.27e-05	-	0	ID=HMM_SL2.30ch07_56000000_62220000_4_493;Name=HMM_SL2.30ch07_56000000_62220000_4_493;Score=9.27e-05;Sequence=LTALVLSHMRGMMLMC
SL2.30ch07_56000000_62220000_4	fimo	sequence_feature	56352928	56352975	9.27e-05	-	0	ID=HMM_SL2.30ch07_56000000_62220000_4_494;Name=HMM_SL2.30ch07_56000000_62220000_4_494;Score=9.27e-05;Sequence=EAFLSHMFNQLVCLIS
SL2.30ch07_56000000_62220000_4	fimo	sequence_feature	61937455	61937502	9.55e-05	-	0	ID=HMM_SL2.30ch07_56000000_62220000_4_495;Name=HMM_SL2.30ch07_56000000_62220000_4_495;Score=9.55e-05;Sequence=LLNLEFSNTKLIQKIA
SL2.30ch07_56000000_62220000_4	fimo	sequence_feature	58138246	58138293	9.55e-05	-	0	ID=HMM_SL2.30ch07_56000000_62220000_4_496;Name=HMM_SL2.30ch07_56000000_62220000_4_496;Score=9.55e-05;Sequence=LRLFYLIHIDLVFIIS
SL2.30ch07_56000000_62220000_4	fimo	sequence_feature	61073806	61073853	9.82e-05	-	0	ID=HMM_SL2.30ch07_56000000_62220000_4_497;Name=HMM_SL2.30ch07_56000000_62220000_4_497;Score=9.82e-05;Sequence=GSTVYFMSNLFEGPIP
SL2.30ch07_56000000_62220000_4	fimo	sequence_feature	60718135	60718182	9.82e-05	-	0	ID=HMM_SL2.30ch07_56000000_62220000_4_498;Name=HMM_SL2.30ch07_56000000_62220000_4_498;Score=9.82e-05;Sequence=LLVINLIHNRTRLMYT
SL2.30ch07_56000000_62220000_4	fimo	sequence_feature	56995663	56995710	9.82e-05	-	0	ID=HMM_SL2.30ch07_56000000_62220000_4_499;Name=HMM_SL2.30ch07_56000000_62220000_4_499;Score=9.82e-05;Sequence=LSVYSLSCNHFSKALF
SL2.30ch07_56000000_62220000_5	fimo	sequence_feature	61075096	61075143	1.38e-07	-	1	ID=HMM_SL2.30ch07_56000000_62220000_5_500;Name=HMM_SL2.30ch07_56000000_62220000_5_500;Score=1.38e-07;Sequence=LRYLDLSSNNFGGNQI
SL2.30ch07_56000000_62220000_5	fimo	sequence_feature	62166925	62166972	9.64e-07	-	1	ID=HMM_SL2.30ch07_56000000_62220000_5_501;Name=HMM_SL2.30ch07_56000000_62220000_5_501;Score=9.64e-07;Sequence=LQDLVMAHNTRVCEIP
SL2.30ch07_56000000_62220000_5	fimo	sequence_feature	61074949	61074996	1.24e-06	-	1	ID=HMM_SL2.30ch07_56000000_62220000_5_502;Name=HMM_SL2.30ch07_56000000_62220000_5_502;Score=1.24e-06;Sequence=LHFLDLSSYSTNGPFA
SL2.30ch07_56000000_62220000_5	fimo	sequence_feature	61055287	61055334	1.24e-06	-	1	ID=HMM_SL2.30ch07_56000000_62220000_5_503;Name=HMM_SL2.30ch07_56000000_62220000_5_503;Score=1.24e-06;Sequence=LVVSHLIHNLLIRLIQ
SL2.30ch07_56000000_62220000_5	fimo	sequence_feature	60137962	60138009	1.55e-06	-	1	ID=HMM_SL2.30ch07_56000000_62220000_5_504;Name=HMM_SL2.30ch07_56000000_62220000_5_504;Score=1.55e-06;Sequence=PFGSFLSDNDLTGSIP
SL2.30ch07_56000000_62220000_5	fimo	sequence_feature	57024091	57024138	2.23e-06	-	1	ID=HMM_SL2.30ch07_56000000_62220000_5_505;Name=HMM_SL2.30ch07_56000000_62220000_5_505;Score=2.23e-06;Sequence=VNGLNLSHNKPISNNP
SL2.30ch07_56000000_62220000_5	fimo	sequence_feature	58974457	58974504	2.48e-06	-	1	ID=HMM_SL2.30ch07_56000000_62220000_5_506;Name=HMM_SL2.30ch07_56000000_62220000_5_506;Score=2.48e-06;Sequence=LLTLSLSQNHAFSSPP
SL2.30ch07_56000000_62220000_5	fimo	sequence_feature	56401405	56401452	2.65e-06	-	1	ID=HMM_SL2.30ch07_56000000_62220000_5_507;Name=HMM_SL2.30ch07_56000000_62220000_5_507;Score=2.65e-06;Sequence=CRVLYLIPNELFDHIP
SL2.30ch07_56000000_62220000_5	fimo	sequence_feature	59821654	59821701	3.76e-06	-	1	ID=HMM_SL2.30ch07_56000000_62220000_5_508;Name=HMM_SL2.30ch07_56000000_62220000_5_508;Score=3.76e-06;Sequence=LQYLSISFNRKISMNP
SL2.30ch07_56000000_62220000_5	fimo	sequence_feature	59625901	59625948	4.03e-06	-	1	ID=HMM_SL2.30ch07_56000000_62220000_5_509;Name=HMM_SL2.30ch07_56000000_62220000_5_509;Score=4.03e-06;Sequence=LSFLNKSSNLPVSQID
SL2.30ch07_56000000_62220000_5	fimo	sequence_feature	56980837	56980884	4.03e-06	-	1	ID=HMM_SL2.30ch07_56000000_62220000_5_510;Name=HMM_SL2.30ch07_56000000_62220000_5_510;Score=4.03e-06;Sequence=LTRLSPSHPNLTRLSP
SL2.30ch07_56000000_62220000_5	fimo	sequence_feature	56980867	56980914	4.47e-06	-	1	ID=HMM_SL2.30ch07_56000000_62220000_5_511;Name=HMM_SL2.30ch07_56000000_62220000_5_511;Score=4.47e-06;Sequence=LARLSPSHPNLTRLSP
SL2.30ch07_56000000_62220000_5	fimo	sequence_feature	61074712	61074759	5.67e-06	-	1	ID=HMM_SL2.30ch07_56000000_62220000_5_512;Name=HMM_SL2.30ch07_56000000_62220000_5_512;Score=5.67e-06;Sequence=LLVLDFSNNRFSSLFP
SL2.30ch07_56000000_62220000_5	fimo	sequence_feature	56351401	56351448	6.47e-06	-	1	ID=HMM_SL2.30ch07_56000000_62220000_5_513;Name=HMM_SL2.30ch07_56000000_62220000_5_513;Score=6.47e-06;Sequence=LLHSDLFHPEPSDQIP
SL2.30ch07_56000000_62220000_5	fimo	sequence_feature	61075021	61075068	7.36e-06	-	1	ID=HMM_SL2.30ch07_56000000_62220000_5_514;Name=HMM_SL2.30ch07_56000000_62220000_5_514;Score=7.36e-06;Sequence=LRYLNLSNSGFDGPVP
SL2.30ch07_56000000_62220000_5	fimo	sequence_feature	60777562	60777609	7.84e-06	-	1	ID=HMM_SL2.30ch07_56000000_62220000_5_515;Name=HMM_SL2.30ch07_56000000_62220000_5_515;Score=7.84e-06;Sequence=LQNLCLNTENLSETIS
SL2.30ch07_56000000_62220000_5	fimo	sequence_feature	59268052	59268099	7.84e-06	-	1	ID=HMM_SL2.30ch07_56000000_62220000_5_516;Name=HMM_SL2.30ch07_56000000_62220000_5_516;Score=7.84e-06;Sequence=LQNLCLNTENLSETIS
SL2.30ch07_56000000_62220000_5	fimo	sequence_feature	60977611	60977658	9.43e-06	-	1	ID=HMM_SL2.30ch07_56000000_62220000_5_517;Name=HMM_SL2.30ch07_56000000_62220000_5_517;Score=9.43e-06;Sequence=LERLILNNGSLRTRIF
SL2.30ch07_56000000_62220000_5	fimo	sequence_feature	61787449	61787496	1.06e-05	-	1	ID=HMM_SL2.30ch07_56000000_62220000_5_518;Name=HMM_SL2.30ch07_56000000_62220000_5_518;Score=1.06e-05;Sequence=DELSDLISFLMQGKIP
SL2.30ch07_56000000_62220000_5	fimo	sequence_feature	60140500	60140547	1.13e-05	-	1	ID=HMM_SL2.30ch07_56000000_62220000_5_519;Name=HMM_SL2.30ch07_56000000_62220000_5_519;Score=1.13e-05;Sequence=LLILQLSTFSFFPAIP
SL2.30ch07_56000000_62220000_5	fimo	sequence_feature	60008428	60008475	1.16e-05	-	1	ID=HMM_SL2.30ch07_56000000_62220000_5_520;Name=HMM_SL2.30ch07_56000000_62220000_5_520;Score=1.16e-05;Sequence=LLTLSLSHDTRSINIR
SL2.30ch07_56000000_62220000_5	fimo	sequence_feature	58936606	58936653	1.19e-05	-	1	ID=HMM_SL2.30ch07_56000000_62220000_5_521;Name=HMM_SL2.30ch07_56000000_62220000_5_521;Score=1.19e-05;Sequence=SRALNLGCWQLMILIA
SL2.30ch07_56000000_62220000_5	fimo	sequence_feature	58184074	58184121	1.19e-05	-	1	ID=HMM_SL2.30ch07_56000000_62220000_5_522;Name=HMM_SL2.30ch07_56000000_62220000_5_522;Score=1.19e-05;Sequence=QKHKQLSHIQFSGTIP
SL2.30ch07_56000000_62220000_5	fimo	sequence_feature	59052862	59052909	1.49e-05	-	1	ID=HMM_SL2.30ch07_56000000_62220000_5_523;Name=HMM_SL2.30ch07_56000000_62220000_5_523;Score=1.49e-05;Sequence=FWFFILSSNLKIKDIP
SL2.30ch07_56000000_62220000_5	fimo	sequence_feature	57084778	57084825	1.54e-05	-	1	ID=HMM_SL2.30ch07_56000000_62220000_5_524;Name=HMM_SL2.30ch07_56000000_62220000_5_524;Score=1.54e-05;Sequence=IIYLSCFHIQLVGSRP
SL2.30ch07_56000000_62220000_5	fimo	sequence_feature	56904772	56904819	1.71e-05	-	1	ID=HMM_SL2.30ch07_56000000_62220000_5_525;Name=HMM_SL2.30ch07_56000000_62220000_5_525;Score=1.71e-05;Sequence=LLQENLAEISRNQLIP
SL2.30ch07_56000000_62220000_5	fimo	sequence_feature	60081643	60081690	1.81e-05	-	1	ID=HMM_SL2.30ch07_56000000_62220000_5_526;Name=HMM_SL2.30ch07_56000000_62220000_5_526;Score=1.81e-05;Sequence=LLLLNIIFLVLKLQIN
SL2.30ch07_56000000_62220000_5	fimo	sequence_feature	61497397	61497444	1.97e-05	-	1	ID=HMM_SL2.30ch07_56000000_62220000_5_527;Name=HMM_SL2.30ch07_56000000_62220000_5_527;Score=1.97e-05;Sequence=HEKLVLSGKTLIISIN
SL2.30ch07_56000000_62220000_5	fimo	sequence_feature	56787709	56787756	1.97e-05	-	1	ID=HMM_SL2.30ch07_56000000_62220000_5_528;Name=HMM_SL2.30ch07_56000000_62220000_5_528;Score=1.97e-05;Sequence=LSILPLSNNPLLLNKP
SL2.30ch07_56000000_62220000_5	fimo	sequence_feature	59893501	59893548	2.02e-05	-	1	ID=HMM_SL2.30ch07_56000000_62220000_5_529;Name=HMM_SL2.30ch07_56000000_62220000_5_529;Score=2.02e-05;Sequence=LTVLDSSWVSVEHKID
SL2.30ch07_56000000_62220000_5	fimo	sequence_feature	61412596	61412643	2.13e-05	-	1	ID=HMM_SL2.30ch07_56000000_62220000_5_530;Name=HMM_SL2.30ch07_56000000_62220000_5_530;Score=2.13e-05;Sequence=KIPLYKHQNQLNKDIP
SL2.30ch07_56000000_62220000_5	fimo	sequence_feature	60019171	60019218	2.13e-05	-	1	ID=HMM_SL2.30ch07_56000000_62220000_5_531;Name=HMM_SL2.30ch07_56000000_62220000_5_531;Score=2.13e-05;Sequence=FSFLHLSYSVSTGVQP
SL2.30ch07_56000000_62220000_5	fimo	sequence_feature	56950063	56950110	2.26e-05	-	1	ID=HMM_SL2.30ch07_56000000_62220000_5_532;Name=HMM_SL2.30ch07_56000000_62220000_5_532;Score=2.26e-05;Sequence=RKALNLNVNTLSVPIY
SL2.30ch07_56000000_62220000_5	fimo	sequence_feature	61423492	61423539	2.32e-05	-	1	ID=HMM_SL2.30ch07_56000000_62220000_5_533;Name=HMM_SL2.30ch07_56000000_62220000_5_533;Score=2.32e-05;Sequence=LAHKNESCPHLRGRVE
SL2.30ch07_56000000_62220000_5	fimo	sequence_feature	61306507	61306554	2.32e-05	-	1	ID=HMM_SL2.30ch07_56000000_62220000_5_534;Name=HMM_SL2.30ch07_56000000_62220000_5_534;Score=2.32e-05;Sequence=QIHIVLFSKKLNLLIP
SL2.30ch07_56000000_62220000_5	fimo	sequence_feature	57084991	57085038	2.32e-05	-	1	ID=HMM_SL2.30ch07_56000000_62220000_5_535;Name=HMM_SL2.30ch07_56000000_62220000_5_535;Score=2.32e-05;Sequence=LRLLQLNEKHSQTSIA
SL2.30ch07_56000000_62220000_5	fimo	sequence_feature	57178924	57178971	2.45e-05	-	1	ID=HMM_SL2.30ch07_56000000_62220000_5_536;Name=HMM_SL2.30ch07_56000000_62220000_5_536;Score=2.45e-05;Sequence=LSIEHMNFNKLEVTIL
SL2.30ch07_56000000_62220000_5	fimo	sequence_feature	57838114	57838161	2.52e-05	-	1	ID=HMM_SL2.30ch07_56000000_62220000_5_537;Name=HMM_SL2.30ch07_56000000_62220000_5_537;Score=2.52e-05;Sequence=LTILNLNYLNICSTIG
SL2.30ch07_56000000_62220000_5	fimo	sequence_feature	61938265	61938312	2.59e-05	-	1	ID=HMM_SL2.30ch07_56000000_62220000_5_538;Name=HMM_SL2.30ch07_56000000_62220000_5_538;Score=2.59e-05;Sequence=LSQNINSRNNLTINSP
SL2.30ch07_56000000_62220000_5	fimo	sequence_feature	60162508	60162555	2.59e-05	-	1	ID=HMM_SL2.30ch07_56000000_62220000_5_539;Name=HMM_SL2.30ch07_56000000_62220000_5_539;Score=2.59e-05;Sequence=FEYLHLFFFLLRGNMA
SL2.30ch07_56000000_62220000_5	fimo	sequence_feature	57098998	57099045	2.67e-05	-	1	ID=HMM_SL2.30ch07_56000000_62220000_5_540;Name=HMM_SL2.30ch07_56000000_62220000_5_540;Score=2.67e-05;Sequence=LSFLSNSYDSLNWYIQ
SL2.30ch07_56000000_62220000_5	fimo	sequence_feature	59462185	59462232	2.74e-05	-	1	ID=HMM_SL2.30ch07_56000000_62220000_5_541;Name=HMM_SL2.30ch07_56000000_62220000_5_541;Score=2.74e-05;Sequence=SKYLTLFSFILEGAIP
SL2.30ch07_56000000_62220000_5	fimo	sequence_feature	57922828	57922875	2.74e-05	-	1	ID=HMM_SL2.30ch07_56000000_62220000_5_542;Name=HMM_SL2.30ch07_56000000_62220000_5_542;Score=2.74e-05;Sequence=LSNLVCSTNEQECSIY
SL2.30ch07_56000000_62220000_5	fimo	sequence_feature	61276063	61276110	2.99e-05	-	1	ID=HMM_SL2.30ch07_56000000_62220000_5_543;Name=HMM_SL2.30ch07_56000000_62220000_5_543;Score=2.99e-05;Sequence=LSFQFQSYNEFSGNFP
SL2.30ch07_56000000_62220000_5	fimo	sequence_feature	60996844	60996891	2.99e-05	-	1	ID=HMM_SL2.30ch07_56000000_62220000_5_544;Name=HMM_SL2.30ch07_56000000_62220000_5_544;Score=2.99e-05;Sequence=LKKYNLGHNSHHWKIK
SL2.30ch07_56000000_62220000_5	fimo	sequence_feature	56749243	56749290	2.99e-05	-	1	ID=HMM_SL2.30ch07_56000000_62220000_5_545;Name=HMM_SL2.30ch07_56000000_62220000_5_545;Score=2.99e-05;Sequence=TNSLVNSESSLIRKIP
SL2.30ch07_56000000_62220000_5	fimo	sequence_feature	59535874	59535921	3.07e-05	-	1	ID=HMM_SL2.30ch07_56000000_62220000_5_546;Name=HMM_SL2.30ch07_56000000_62220000_5_546;Score=3.07e-05;Sequence=HLFLNLKRQNLSGRFV
SL2.30ch07_56000000_62220000_5	fimo	sequence_feature	60470074	60470121	3.16e-05	-	1	ID=HMM_SL2.30ch07_56000000_62220000_5_547;Name=HMM_SL2.30ch07_56000000_62220000_5_547;Score=3.16e-05;Sequence=TRFHHLSTPNSSLKIP
SL2.30ch07_56000000_62220000_5	fimo	sequence_feature	56657956	56658003	3.16e-05	-	1	ID=HMM_SL2.30ch07_56000000_62220000_5_548;Name=HMM_SL2.30ch07_56000000_62220000_5_548;Score=3.16e-05;Sequence=WINLTLSKDSLNKSIP
SL2.30ch07_56000000_62220000_5	fimo	sequence_feature	61946026	61946073	3.26e-05	-	1	ID=HMM_SL2.30ch07_56000000_62220000_5_549;Name=HMM_SL2.30ch07_56000000_62220000_5_549;Score=3.26e-05;Sequence=LSQQNLNSNNSLTKIS
SL2.30ch07_56000000_62220000_5	fimo	sequence_feature	59971297	59971344	3.26e-05	-	1	ID=HMM_SL2.30ch07_56000000_62220000_5_550;Name=HMM_SL2.30ch07_56000000_62220000_5_550;Score=3.26e-05;Sequence=LLLIHLNSLLKKGKIF
SL2.30ch07_56000000_62220000_5	fimo	sequence_feature	61699810	61699857	3.45e-05	-	1	ID=HMM_SL2.30ch07_56000000_62220000_5_551;Name=HMM_SL2.30ch07_56000000_62220000_5_551;Score=3.45e-05;Sequence=LNHPNLSRPRNTTSHP
SL2.30ch07_56000000_62220000_5	fimo	sequence_feature	60331456	60331503	3.45e-05	-	1	ID=HMM_SL2.30ch07_56000000_62220000_5_552;Name=HMM_SL2.30ch07_56000000_62220000_5_552;Score=3.45e-05;Sequence=LQSLDSRNNLLHKTMP
SL2.30ch07_56000000_62220000_5	fimo	sequence_feature	61074112	61074159	3.56e-05	-	1	ID=HMM_SL2.30ch07_56000000_62220000_5_553;Name=HMM_SL2.30ch07_56000000_62220000_5_553;Score=3.56e-05;Sequence=LKELYISSNSLPPSLP
SL2.30ch07_56000000_62220000_5	fimo	sequence_feature	56881228	56881275	3.56e-05	-	1	ID=HMM_SL2.30ch07_56000000_62220000_5_554;Name=HMM_SL2.30ch07_56000000_62220000_5_554;Score=3.56e-05;Sequence=SFYLYLRSVHLMLSIP
SL2.30ch07_56000000_62220000_5	fimo	sequence_feature	59514688	59514735	3.89e-05	-	1	ID=HMM_SL2.30ch07_56000000_62220000_5_555;Name=HMM_SL2.30ch07_56000000_62220000_5_555;Score=3.89e-05;Sequence=LITLNLLSFLLNYFIF
SL2.30ch07_56000000_62220000_5	fimo	sequence_feature	60093013	60093060	4e-05	-	1	ID=HMM_SL2.30ch07_56000000_62220000_5_556;Name=HMM_SL2.30ch07_56000000_62220000_5_556;Score=4e-05;Sequence=YTLLSLHFTNLTPKIH
SL2.30ch07_56000000_62220000_5	fimo	sequence_feature	57273535	57273582	4e-05	-	1	ID=HMM_SL2.30ch07_56000000_62220000_5_557;Name=HMM_SL2.30ch07_56000000_62220000_5_557;Score=4e-05;Sequence=FNIFNLSRNHLKFQLH
SL2.30ch07_56000000_62220000_5	fimo	sequence_feature	58470445	58470492	4.12e-05	-	1	ID=HMM_SL2.30ch07_56000000_62220000_5_558;Name=HMM_SL2.30ch07_56000000_62220000_5_558;Score=4.12e-05;Sequence=FSHLTWSRNTLSIEIT
SL2.30ch07_56000000_62220000_5	fimo	sequence_feature	56243950	56243997	4.12e-05	-	1	ID=HMM_SL2.30ch07_56000000_62220000_5_559;Name=HMM_SL2.30ch07_56000000_62220000_5_559;Score=4.12e-05;Sequence=LLHLSRFDPLLSCSSP
SL2.30ch07_56000000_62220000_5	fimo	sequence_feature	60476026	60476073	4.25e-05	-	1	ID=HMM_SL2.30ch07_56000000_62220000_5_560;Name=HMM_SL2.30ch07_56000000_62220000_5_560;Score=4.25e-05;Sequence=STTYNQGQTSLKARIP
SL2.30ch07_56000000_62220000_5	fimo	sequence_feature	59102362	59102409	4.38e-05	-	1	ID=HMM_SL2.30ch07_56000000_62220000_5_561;Name=HMM_SL2.30ch07_56000000_62220000_5_561;Score=4.38e-05;Sequence=FVYKYLSFNILVHKKP
SL2.30ch07_56000000_62220000_5	fimo	sequence_feature	58485646	58485693	4.38e-05	-	1	ID=HMM_SL2.30ch07_56000000_62220000_5_562;Name=HMM_SL2.30ch07_56000000_62220000_5_562;Score=4.38e-05;Sequence=VNMLVLSQTSLENLIF
SL2.30ch07_56000000_62220000_5	fimo	sequence_feature	57964819	57964866	4.38e-05	-	1	ID=HMM_SL2.30ch07_56000000_62220000_5_563;Name=HMM_SL2.30ch07_56000000_62220000_5_563;Score=4.38e-05;Sequence=MHLLNLSGLNSIASSP
SL2.30ch07_56000000_62220000_5	fimo	sequence_feature	58241587	58241634	4.51e-05	-	1	ID=HMM_SL2.30ch07_56000000_62220000_5_564;Name=HMM_SL2.30ch07_56000000_62220000_5_564;Score=4.51e-05;Sequence=LLFFDLFYNVLYDRTH
SL2.30ch07_56000000_62220000_5	fimo	sequence_feature	60854848	60854895	4.65e-05	-	1	ID=HMM_SL2.30ch07_56000000_62220000_5_565;Name=HMM_SL2.30ch07_56000000_62220000_5_565;Score=4.65e-05;Sequence=KHTLYLTWCQLKFDTP
SL2.30ch07_56000000_62220000_5	fimo	sequence_feature	59171359	59171406	4.65e-05	-	1	ID=HMM_SL2.30ch07_56000000_62220000_5_566;Name=HMM_SL2.30ch07_56000000_62220000_5_566;Score=4.65e-05;Sequence=RKTSNLSHTYLNLPIP
SL2.30ch07_56000000_62220000_5	fimo	sequence_feature	56397205	56397252	4.65e-05	-	1	ID=HMM_SL2.30ch07_56000000_62220000_5_567;Name=HMM_SL2.30ch07_56000000_62220000_5_567;Score=4.65e-05;Sequence=LLTLDLNPNSTLDSTP
SL2.30ch07_56000000_62220000_5	fimo	sequence_feature	58825849	58825896	4.79e-05	-	1	ID=HMM_SL2.30ch07_56000000_62220000_5_568;Name=HMM_SL2.30ch07_56000000_62220000_5_568;Score=4.79e-05;Sequence=TSFLNLFIHVLKVEIL
SL2.30ch07_56000000_62220000_5	fimo	sequence_feature	56411236	56411283	4.94e-05	-	1	ID=HMM_SL2.30ch07_56000000_62220000_5_569;Name=HMM_SL2.30ch07_56000000_62220000_5_569;Score=4.94e-05;Sequence=LHVLSLSPNDSSAMDS
SL2.30ch07_56000000_62220000_5	fimo	sequence_feature	57046648	57046695	5.25e-05	-	1	ID=HMM_SL2.30ch07_56000000_62220000_5_570;Name=HMM_SL2.30ch07_56000000_62220000_5_570;Score=5.25e-05;Sequence=ARLCILSINFLNLMIP
SL2.30ch07_56000000_62220000_5	fimo	sequence_feature	61746442	61746489	5.41e-05	-	1	ID=HMM_SL2.30ch07_56000000_62220000_5_571;Name=HMM_SL2.30ch07_56000000_62220000_5_571;Score=5.41e-05;Sequence=LILLNLSFRSSQIKCV
SL2.30ch07_56000000_62220000_5	fimo	sequence_feature	61123546	61123593	5.58e-05	-	1	ID=HMM_SL2.30ch07_56000000_62220000_5_572;Name=HMM_SL2.30ch07_56000000_62220000_5_572;Score=5.58e-05;Sequence=LLLRQLPNPPLSQEIP
SL2.30ch07_56000000_62220000_5	fimo	sequence_feature	60333148	60333195	5.58e-05	-	1	ID=HMM_SL2.30ch07_56000000_62220000_5_573;Name=HMM_SL2.30ch07_56000000_62220000_5_573;Score=5.58e-05;Sequence=LVVLFLSQIEGEITIM
SL2.30ch07_56000000_62220000_5	fimo	sequence_feature	60192886	60192933	5.58e-05	-	1	ID=HMM_SL2.30ch07_56000000_62220000_5_574;Name=HMM_SL2.30ch07_56000000_62220000_5_574;Score=5.58e-05;Sequence=INYFYLFLNQLNEQIF
SL2.30ch07_56000000_62220000_5	fimo	sequence_feature	57460963	57461010	5.58e-05	-	1	ID=HMM_SL2.30ch07_56000000_62220000_5_575;Name=HMM_SL2.30ch07_56000000_62220000_5_575;Score=5.58e-05;Sequence=RALLYSSYLLLTSTIS
SL2.30ch07_56000000_62220000_5	fimo	sequence_feature	61108150	61108197	5.75e-05	-	1	ID=HMM_SL2.30ch07_56000000_62220000_5_576;Name=HMM_SL2.30ch07_56000000_62220000_5_576;Score=5.75e-05;Sequence=FRLRVLSCPLLKTFIP
SL2.30ch07_56000000_62220000_5	fimo	sequence_feature	61782958	61783005	5.93e-05	-	1	ID=HMM_SL2.30ch07_56000000_62220000_5_577;Name=HMM_SL2.30ch07_56000000_62220000_5_577;Score=5.93e-05;Sequence=QETLVLSTNSMKLHLL
SL2.30ch07_56000000_62220000_5	fimo	sequence_feature	61492387	61492434	5.93e-05	-	1	ID=HMM_SL2.30ch07_56000000_62220000_5_578;Name=HMM_SL2.30ch07_56000000_62220000_5_578;Score=5.93e-05;Sequence=YEHLHYSSQLSNGPIN
SL2.30ch07_56000000_62220000_5	fimo	sequence_feature	61024003	61024050	5.93e-05	-	1	ID=HMM_SL2.30ch07_56000000_62220000_5_579;Name=HMM_SL2.30ch07_56000000_62220000_5_579;Score=5.93e-05;Sequence=LSLLHLFHWKNIAFPP
SL2.30ch07_56000000_62220000_5	fimo	sequence_feature	60904780	60904827	5.93e-05	-	1	ID=HMM_SL2.30ch07_56000000_62220000_5_580;Name=HMM_SL2.30ch07_56000000_62220000_5_580;Score=5.93e-05;Sequence=LEISMLFFNSLVITTK
SL2.30ch07_56000000_62220000_5	fimo	sequence_feature	60567346	60567393	5.93e-05	-	1	ID=HMM_SL2.30ch07_56000000_62220000_5_581;Name=HMM_SL2.30ch07_56000000_62220000_5_581;Score=5.93e-05;Sequence=SWRLSLSNLHLMKKKI
SL2.30ch07_56000000_62220000_5	fimo	sequence_feature	61899112	61899159	6.11e-05	-	1	ID=HMM_SL2.30ch07_56000000_62220000_5_582;Name=HMM_SL2.30ch07_56000000_62220000_5_582;Score=6.11e-05;Sequence=LVLLILIVYRLNMEIH
SL2.30ch07_56000000_62220000_5	fimo	sequence_feature	61820155	61820202	6.11e-05	-	1	ID=HMM_SL2.30ch07_56000000_62220000_5_583;Name=HMM_SL2.30ch07_56000000_62220000_5_583;Score=6.11e-05;Sequence=LVLLILIVYRLNMEIH
SL2.30ch07_56000000_62220000_5	fimo	sequence_feature	58833238	58833285	6.11e-05	-	1	ID=HMM_SL2.30ch07_56000000_62220000_5_584;Name=HMM_SL2.30ch07_56000000_62220000_5_584;Score=6.11e-05;Sequence=LLILLAVQNVLVGKYA
SL2.30ch07_56000000_62220000_5	fimo	sequence_feature	61330057	61330104	6.3e-05	-	1	ID=HMM_SL2.30ch07_56000000_62220000_5_585;Name=HMM_SL2.30ch07_56000000_62220000_5_585;Score=6.3e-05;Sequence=LIILNLNINFFGPRID
SL2.30ch07_56000000_62220000_5	fimo	sequence_feature	59407471	59407518	6.3e-05	-	1	ID=HMM_SL2.30ch07_56000000_62220000_5_586;Name=HMM_SL2.30ch07_56000000_62220000_5_586;Score=6.3e-05;Sequence=LNYLNGNYVTLFINIQ
SL2.30ch07_56000000_62220000_5	fimo	sequence_feature	59364901	59364948	6.3e-05	-	1	ID=HMM_SL2.30ch07_56000000_62220000_5_587;Name=HMM_SL2.30ch07_56000000_62220000_5_587;Score=6.3e-05;Sequence=CSELQLNGNDEMVQIV
SL2.30ch07_56000000_62220000_5	fimo	sequence_feature	58851640	58851687	6.3e-05	-	1	ID=HMM_SL2.30ch07_56000000_62220000_5_588;Name=HMM_SL2.30ch07_56000000_62220000_5_588;Score=6.3e-05;Sequence=FSHWVLSSKVLTRHII
SL2.30ch07_56000000_62220000_5	fimo	sequence_feature	60922057	60922104	6.49e-05	-	1	ID=HMM_SL2.30ch07_56000000_62220000_5_589;Name=HMM_SL2.30ch07_56000000_62220000_5_589;Score=6.49e-05;Sequence=LGIFFSFNCSQKGHIP
SL2.30ch07_56000000_62220000_5	fimo	sequence_feature	60175081	60175128	6.49e-05	-	1	ID=HMM_SL2.30ch07_56000000_62220000_5_590;Name=HMM_SL2.30ch07_56000000_62220000_5_590;Score=6.49e-05;Sequence=LARLSPPSPNLSCHIY
SL2.30ch07_56000000_62220000_5	fimo	sequence_feature	58160989	58161036	6.49e-05	-	1	ID=HMM_SL2.30ch07_56000000_62220000_5_591;Name=HMM_SL2.30ch07_56000000_62220000_5_591;Score=6.49e-05;Sequence=LHHMNLGCIVYNHHHP
SL2.30ch07_56000000_62220000_5	fimo	sequence_feature	59110051	59110098	6.89e-05	-	1	ID=HMM_SL2.30ch07_56000000_62220000_5_592;Name=HMM_SL2.30ch07_56000000_62220000_5_592;Score=6.89e-05;Sequence=NNQLNLAENFISHQIK
SL2.30ch07_56000000_62220000_5	fimo	sequence_feature	58364284	58364331	6.89e-05	-	1	ID=HMM_SL2.30ch07_56000000_62220000_5_593;Name=HMM_SL2.30ch07_56000000_62220000_5_593;Score=6.89e-05;Sequence=KLKLYRSHNQDKLHII
SL2.30ch07_56000000_62220000_5	fimo	sequence_feature	60799573	60799620	7.11e-05	-	1	ID=HMM_SL2.30ch07_56000000_62220000_5_594;Name=HMM_SL2.30ch07_56000000_62220000_5_594;Score=7.11e-05;Sequence=RTHFVSSYFSLRGAIT
SL2.30ch07_56000000_62220000_5	fimo	sequence_feature	61370275	61370322	7.32e-05	-	1	ID=HMM_SL2.30ch07_56000000_62220000_5_595;Name=HMM_SL2.30ch07_56000000_62220000_5_595;Score=7.32e-05;Sequence=LAYGCLNYNLLVQHNI
SL2.30ch07_56000000_62220000_5	fimo	sequence_feature	60110848	60110895	7.32e-05	-	1	ID=HMM_SL2.30ch07_56000000_62220000_5_596;Name=HMM_SL2.30ch07_56000000_62220000_5_596;Score=7.32e-05;Sequence=ERHLHIIFNNLDILFP
SL2.30ch07_56000000_62220000_5	fimo	sequence_feature	56776213	56776260	7.32e-05	-	1	ID=HMM_SL2.30ch07_56000000_62220000_5_597;Name=HMM_SL2.30ch07_56000000_62220000_5_597;Score=7.32e-05;Sequence=IRYLYQSYVSLHQSSP
SL2.30ch07_56000000_62220000_5	fimo	sequence_feature	60158848	60158895	7.54e-05	-	1	ID=HMM_SL2.30ch07_56000000_62220000_5_598;Name=HMM_SL2.30ch07_56000000_62220000_5_598;Score=7.54e-05;Sequence=LSLLVLLYLQIRTTIY
SL2.30ch07_56000000_62220000_5	fimo	sequence_feature	59302660	59302707	7.77e-05	-	1	ID=HMM_SL2.30ch07_56000000_62220000_5_599;Name=HMM_SL2.30ch07_56000000_62220000_5_599;Score=7.77e-05;Sequence=ELLLLLITNHINGTAH
SL2.30ch07_56000000_62220000_5	fimo	sequence_feature	61815328	61815375	8.01e-05	-	1	ID=HMM_SL2.30ch07_56000000_62220000_5_600;Name=HMM_SL2.30ch07_56000000_62220000_5_600;Score=8.01e-05;Sequence=QNRSRLFYGQLSGLIK
SL2.30ch07_56000000_62220000_5	fimo	sequence_feature	59911231	59911278	8.01e-05	-	1	ID=HMM_SL2.30ch07_56000000_62220000_5_601;Name=HMM_SL2.30ch07_56000000_62220000_5_601;Score=8.01e-05;Sequence=LSGLNESYDQARRQIL
SL2.30ch07_56000000_62220000_5	fimo	sequence_feature	56896708	56896755	8.01e-05	-	1	ID=HMM_SL2.30ch07_56000000_62220000_5_602;Name=HMM_SL2.30ch07_56000000_62220000_5_602;Score=8.01e-05;Sequence=LSILTLAYLNDTGRYM
SL2.30ch07_56000000_62220000_5	fimo	sequence_feature	56450827	56450874	8.01e-05	-	1	ID=HMM_SL2.30ch07_56000000_62220000_5_603;Name=HMM_SL2.30ch07_56000000_62220000_5_603;Score=8.01e-05;Sequence=LNYLNIFLNTWRSSIG
SL2.30ch07_56000000_62220000_5	fimo	sequence_feature	58821445	58821492	8.25e-05	-	1	ID=HMM_SL2.30ch07_56000000_62220000_5_604;Name=HMM_SL2.30ch07_56000000_62220000_5_604;Score=8.25e-05;Sequence=NGFKNLFSLSLSCLIM
SL2.30ch07_56000000_62220000_5	fimo	sequence_feature	58441987	58442034	8.49e-05	-	1	ID=HMM_SL2.30ch07_56000000_62220000_5_605;Name=HMM_SL2.30ch07_56000000_62220000_5_605;Score=8.49e-05;Sequence=LLDLFLLTNSLSYEFS
SL2.30ch07_56000000_62220000_5	fimo	sequence_feature	58185448	58185495	8.49e-05	-	1	ID=HMM_SL2.30ch07_56000000_62220000_5_606;Name=HMM_SL2.30ch07_56000000_62220000_5_606;Score=8.49e-05;Sequence=PQHLSDSQNQVSGSYT
SL2.30ch07_56000000_62220000_5	fimo	sequence_feature	57473167	57473214	8.49e-05	-	1	ID=HMM_SL2.30ch07_56000000_62220000_5_607;Name=HMM_SL2.30ch07_56000000_62220000_5_607;Score=8.49e-05;Sequence=LHFLNHRMSNLTKHIK
SL2.30ch07_56000000_62220000_5	fimo	sequence_feature	56260465	56260512	8.49e-05	-	1	ID=HMM_SL2.30ch07_56000000_62220000_5_608;Name=HMM_SL2.30ch07_56000000_62220000_5_608;Score=8.49e-05;Sequence=LQILHLSQILHMTIIL
SL2.30ch07_56000000_62220000_5	fimo	sequence_feature	61457452	61457499	8.75e-05	-	1	ID=HMM_SL2.30ch07_56000000_62220000_5_609;Name=HMM_SL2.30ch07_56000000_62220000_5_609;Score=8.75e-05;Sequence=LSLKNSGYNTLSEPNI
SL2.30ch07_56000000_62220000_5	fimo	sequence_feature	58968316	58968363	8.75e-05	-	1	ID=HMM_SL2.30ch07_56000000_62220000_5_610;Name=HMM_SL2.30ch07_56000000_62220000_5_610;Score=8.75e-05;Sequence=QNKDDLAKNQLSHAIN
SL2.30ch07_56000000_62220000_5	fimo	sequence_feature	57028741	57028788	8.75e-05	-	1	ID=HMM_SL2.30ch07_56000000_62220000_5_611;Name=HMM_SL2.30ch07_56000000_62220000_5_611;Score=8.75e-05;Sequence=RVYLDLIYNLLIAVSF
SL2.30ch07_56000000_62220000_5	fimo	sequence_feature	59535937	59535984	9.27e-05	-	1	ID=HMM_SL2.30ch07_56000000_62220000_5_612;Name=HMM_SL2.30ch07_56000000_62220000_5_612;Score=9.27e-05;Sequence=CLFLNLIRQNLSCRFV
SL2.30ch07_56000000_62220000_5	fimo	sequence_feature	57058918	57058965	9.27e-05	-	1	ID=HMM_SL2.30ch07_56000000_62220000_5_613;Name=HMM_SL2.30ch07_56000000_62220000_5_613;Score=9.27e-05;Sequence=LKVDSLSFLKLKIDIC
SL2.30ch07_56000000_62220000_5	fimo	sequence_feature	61452892	61452939	9.55e-05	-	1	ID=HMM_SL2.30ch07_56000000_62220000_5_614;Name=HMM_SL2.30ch07_56000000_62220000_5_614;Score=9.55e-05;Sequence=GEVLDLGWVVLVEKEK
SL2.30ch07_56000000_62220000_5	fimo	sequence_feature	57459403	57459450	9.55e-05	-	1	ID=HMM_SL2.30ch07_56000000_62220000_5_615;Name=HMM_SL2.30ch07_56000000_62220000_5_615;Score=9.55e-05;Sequence=YTLLNIIFYTLHQTVP
SL2.30ch07_56000000_62220000_5	fimo	sequence_feature	60757237	60757284	9.82e-05	-	1	ID=HMM_SL2.30ch07_56000000_62220000_5_616;Name=HMM_SL2.30ch07_56000000_62220000_5_616;Score=9.82e-05;Sequence=VHFLYLIFNNLLLLSI
SL2.30ch07_56000000_62220000_5	fimo	sequence_feature	58682281	58682328	9.82e-05	-	1	ID=HMM_SL2.30ch07_56000000_62220000_5_617;Name=HMM_SL2.30ch07_56000000_62220000_5_617;Score=9.82e-05;Sequence=TMRLVLFRPNKTGLQP
SL2.30ch07_56000000_62220000_6	fimo	sequence_feature	61599547	61599594	8.83e-13	-	2	ID=HMM_SL2.30ch07_56000000_62220000_6_618;Name=HMM_SL2.30ch07_56000000_62220000_6_618;Score=8.83e-13;Sequence=LENLQLFDNHLEGPIP
SL2.30ch07_56000000_62220000_6	fimo	sequence_feature	61598752	61598799	1.26e-12	-	2	ID=HMM_SL2.30ch07_56000000_62220000_6_619;Name=HMM_SL2.30ch07_56000000_62220000_6_619;Score=1.26e-12;Sequence=LETLYLNDNQLIGEIP
SL2.30ch07_56000000_62220000_6	fimo	sequence_feature	61599691	61599738	1.93e-12	-	2	ID=HMM_SL2.30ch07_56000000_62220000_6_620;Name=HMM_SL2.30ch07_56000000_62220000_6_620;Score=1.93e-12;Sequence=LRLLHLFENRLHGKIP
SL2.30ch07_56000000_62220000_6	fimo	sequence_feature	61599403	61599450	6.56e-12	-	2	ID=HMM_SL2.30ch07_56000000_62220000_6_621;Name=HMM_SL2.30ch07_56000000_62220000_6_621;Score=6.56e-12;Sequence=LTFLSLGSNKLSGNIP
SL2.30ch07_56000000_62220000_6	fimo	sequence_feature	61599475	61599522	3.04e-10	-	2	ID=HMM_SL2.30ch07_56000000_62220000_6_622;Name=HMM_SL2.30ch07_56000000_62220000_6_622;Score=3.04e-10;Sequence=LTVVDLSKNNLEGRIP
SL2.30ch07_56000000_62220000_6	fimo	sequence_feature	61598971	61599018	8.16e-10	-	2	ID=HMM_SL2.30ch07_56000000_62220000_6_623;Name=HMM_SL2.30ch07_56000000_62220000_6_623;Score=8.16e-10;Sequence=LELLKLSDNKFNGKIP
SL2.30ch07_56000000_62220000_6	fimo	sequence_feature	61600195	61600242	2.2e-09	-	2	ID=HMM_SL2.30ch07_56000000_62220000_6_624;Name=HMM_SL2.30ch07_56000000_62220000_6_624;Score=2.2e-09;Sequence=LEELVVYSNNLTGRIP
SL2.30ch07_56000000_62220000_6	fimo	sequence_feature	61598680	61598727	3.05e-09	-	2	ID=HMM_SL2.30ch07_56000000_62220000_6_625;Name=HMM_SL2.30ch07_56000000_62220000_6_625;Score=3.05e-09;Sequence=LIVCNLSNNNLVGSVP
SL2.30ch07_56000000_62220000_6	fimo	sequence_feature	61599835	61599882	5.29e-09	-	2	ID=HMM_SL2.30ch07_56000000_62220000_6_626;Name=HMM_SL2.30ch07_56000000_62220000_6_626;Score=5.29e-09;Sequence=LRRLYIYTNQLNGTIP
SL2.30ch07_56000000_62220000_6	fimo	sequence_feature	61599619	61599666	6.58e-09	-	2	ID=HMM_SL2.30ch07_56000000_62220000_6_627;Name=HMM_SL2.30ch07_56000000_62220000_6_627;Score=6.58e-09;Sequence=LKNFDLSINNLTGRIP
SL2.30ch07_56000000_62220000_6	fimo	sequence_feature	61598824	61598871	1.07e-08	-	2	ID=HMM_SL2.30ch07_56000000_62220000_6_628;Name=HMM_SL2.30ch07_56000000_62220000_6_628;Score=1.07e-08;Sequence=QISLNLSHNALNGSIP
SL2.30ch07_56000000_62220000_6	fimo	sequence_feature	61599187	61599234	1.51e-08	-	2	ID=HMM_SL2.30ch07_56000000_62220000_6_629;Name=HMM_SL2.30ch07_56000000_62220000_6_629;Score=1.51e-08;Sequence=LERLLLSNNNFFGKIP
SL2.30ch07_56000000_62220000_6	fimo	sequence_feature	61599763	61599810	1.56e-08	-	2	ID=HMM_SL2.30ch07_56000000_62220000_6_630;Name=HMM_SL2.30ch07_56000000_62220000_6_630;Score=1.56e-08;Sequence=AVEIDLSENQLRGNIP
SL2.30ch07_56000000_62220000_6	fimo	sequence_feature	61600411	61600458	2.14e-08	-	2	ID=HMM_SL2.30ch07_56000000_62220000_6_631;Name=HMM_SL2.30ch07_56000000_62220000_6_631;Score=2.14e-08;Sequence=LTVLNVSSNFISGQIP
SL2.30ch07_56000000_62220000_6	fimo	sequence_feature	61599115	61599162	2.72e-08	-	2	ID=HMM_SL2.30ch07_56000000_62220000_6_632;Name=HMM_SL2.30ch07_56000000_62220000_6_632;Score=2.72e-08;Sequence=LVAFNVSSNRLTGYIP
SL2.30ch07_56000000_62220000_6	fimo	sequence_feature	57378667	57378714	3.12e-08	-	2	ID=HMM_SL2.30ch07_56000000_62220000_6_633;Name=HMM_SL2.30ch07_56000000_62220000_6_633;Score=3.12e-08;Sequence=LEELYLSWLHLLEEIP
SL2.30ch07_56000000_62220000_6	fimo	sequence_feature	61599907	61599954	4.79e-08	-	2	ID=HMM_SL2.30ch07_56000000_62220000_6_634;Name=HMM_SL2.30ch07_56000000_62220000_6_634;Score=4.79e-08;Sequence=LELLALHENSFSGQIP
SL2.30ch07_56000000_62220000_6	fimo	sequence_feature	61600267	61600314	7.86e-08	-	2	ID=HMM_SL2.30ch07_56000000_62220000_6_635;Name=HMM_SL2.30ch07_56000000_62220000_6_635;Score=7.86e-08;Sequence=LRQLYLCENYISGEIP
SL2.30ch07_56000000_62220000_6	fimo	sequence_feature	61600339	61600386	1.27e-07	-	2	ID=HMM_SL2.30ch07_56000000_62220000_6_636;Name=HMM_SL2.30ch07_56000000_62220000_6_636;Score=1.27e-07;Sequence=LEKLNLCTNRFHGEFP
SL2.30ch07_56000000_62220000_6	fimo	sequence_feature	61599043	61599090	1.27e-07	-	2	ID=HMM_SL2.30ch07_56000000_62220000_6_637;Name=HMM_SL2.30ch07_56000000_62220000_6_637;Score=1.27e-07;Sequence=LQRLDLSKNLFTGNLP
SL2.30ch07_56000000_62220000_6	fimo	sequence_feature	61599259	61599306	1.55e-07	-	2	ID=HMM_SL2.30ch07_56000000_62220000_6_638;Name=HMM_SL2.30ch07_56000000_62220000_6_638;Score=1.55e-07;Sequence=LSALELFHNRFSGLLP
SL2.30ch07_56000000_62220000_6	fimo	sequence_feature	56234275	56234322	4.53e-07	-	2	ID=HMM_SL2.30ch07_56000000_62220000_6_639;Name=HMM_SL2.30ch07_56000000_62220000_6_639;Score=4.53e-07;Sequence=SNNLSLSNNQLHIQIT
SL2.30ch07_56000000_62220000_6	fimo	sequence_feature	61599331	61599378	5.51e-07	-	2	ID=HMM_SL2.30ch07_56000000_62220000_6_640;Name=HMM_SL2.30ch07_56000000_62220000_6_640;Score=5.51e-07;Sequence=LEQLMLGDNLLTGSFS
SL2.30ch07_56000000_62220000_6	fimo	sequence_feature	61600051	61600098	9.64e-07	-	2	ID=HMM_SL2.30ch07_56000000_62220000_6_641;Name=HMM_SL2.30ch07_56000000_62220000_6_641;Score=9.64e-07;Sequence=LQVLGVAENRLEGSFP
SL2.30ch07_56000000_62220000_6	fimo	sequence_feature	61599979	61600026	1.36e-06	-	2	ID=HMM_SL2.30ch07_56000000_62220000_6_642;Name=HMM_SL2.30ch07_56000000_62220000_6_642;Score=1.36e-06;Sequence=LINLILWANSFSGAIP
SL2.30ch07_56000000_62220000_6	fimo	sequence_feature	60374773	60374820	2.02e-06	-	2	ID=HMM_SL2.30ch07_56000000_62220000_6_643;Name=HMM_SL2.30ch07_56000000_62220000_6_643;Score=2.02e-06;Sequence=LHQINLEMNDLEFLIP
SL2.30ch07_56000000_62220000_6	fimo	sequence_feature	58330618	58330665	2.02e-06	-	2	ID=HMM_SL2.30ch07_56000000_62220000_6_644;Name=HMM_SL2.30ch07_56000000_62220000_6_644;Score=2.02e-06;Sequence=LIQQNLSNYHLIKNLP
SL2.30ch07_56000000_62220000_6	fimo	sequence_feature	61600123	61600170	2.09e-06	-	2	ID=HMM_SL2.30ch07_56000000_62220000_6_645;Name=HMM_SL2.30ch07_56000000_62220000_6_645;Score=2.09e-06;Sequence=LRIIRAGRNYLSGPIP
SL2.30ch07_56000000_62220000_6	fimo	sequence_feature	61186462	61186509	4.03e-06	-	2	ID=HMM_SL2.30ch07_56000000_62220000_6_646;Name=HMM_SL2.30ch07_56000000_62220000_6_646;Score=4.03e-06;Sequence=LVALDMSHEKLESKIQ
SL2.30ch07_56000000_62220000_6	fimo	sequence_feature	59755159	59755206	4.32e-06	-	2	ID=HMM_SL2.30ch07_56000000_62220000_6_647;Name=HMM_SL2.30ch07_56000000_62220000_6_647;Score=4.32e-06;Sequence=NTLLNNIDFTLNGPTP
SL2.30ch07_56000000_62220000_6	fimo	sequence_feature	59119441	59119488	4.79e-06	-	2	ID=HMM_SL2.30ch07_56000000_62220000_6_648;Name=HMM_SL2.30ch07_56000000_62220000_6_648;Score=4.79e-06;Sequence=LEKLDLSSQHWQGADI
SL2.30ch07_56000000_62220000_6	fimo	sequence_feature	61598899	61598946	5.3e-06	-	2	ID=HMM_SL2.30ch07_56000000_62220000_6_649;Name=HMM_SL2.30ch07_56000000_62220000_6_649;Score=5.3e-06;Sequence=LTDLEMGGNFFSGSIP
SL2.30ch07_56000000_62220000_6	fimo	sequence_feature	57738667	57738714	6.06e-06	-	2	ID=HMM_SL2.30ch07_56000000_62220000_6_650;Name=HMM_SL2.30ch07_56000000_62220000_6_650;Score=6.06e-06;Sequence=LCFLSLISNELKLFIH
SL2.30ch07_56000000_62220000_6	fimo	sequence_feature	61078858	61078905	7.84e-06	-	2	ID=HMM_SL2.30ch07_56000000_62220000_6_651;Name=HMM_SL2.30ch07_56000000_62220000_6_651;Score=7.84e-06;Sequence=LSNWTLNSRHLRGKGP
SL2.30ch07_56000000_62220000_6	fimo	sequence_feature	61784413	61784460	8.09e-06	-	2	ID=HMM_SL2.30ch07_56000000_62220000_6_652;Name=HMM_SL2.30ch07_56000000_62220000_6_652;Score=8.09e-06;Sequence=LQHLQLSSIVLFGLLV
SL2.30ch07_56000000_62220000_6	fimo	sequence_feature	57744055	57744102	8.87e-06	-	2	ID=HMM_SL2.30ch07_56000000_62220000_6_653;Name=HMM_SL2.30ch07_56000000_62220000_6_653;Score=8.87e-06;Sequence=YRLLVNFCNSLNNLIG
SL2.30ch07_56000000_62220000_6	fimo	sequence_feature	59013301	59013348	9.72e-06	-	2	ID=HMM_SL2.30ch07_56000000_62220000_6_654;Name=HMM_SL2.30ch07_56000000_62220000_6_654;Score=9.72e-06;Sequence=LTTKSLSFQKLKKEIT
SL2.30ch07_56000000_62220000_6	fimo	sequence_feature	57169789	57169836	9.72e-06	-	2	ID=HMM_SL2.30ch07_56000000_62220000_6_655;Name=HMM_SL2.30ch07_56000000_62220000_6_655;Score=9.72e-06;Sequence=LALLVLNFVNLVPKVL
SL2.30ch07_56000000_62220000_6	fimo	sequence_feature	60605527	60605574	1.13e-05	-	2	ID=HMM_SL2.30ch07_56000000_62220000_6_656;Name=HMM_SL2.30ch07_56000000_62220000_6_656;Score=1.13e-05;Sequence=LTLLVIFDHSLHNSID
SL2.30ch07_56000000_62220000_6	fimo	sequence_feature	60385258	60385305	1.13e-05	-	2	ID=HMM_SL2.30ch07_56000000_62220000_6_657;Name=HMM_SL2.30ch07_56000000_62220000_6_657;Score=1.13e-05;Sequence=LFHLVDSFQSSFGKIP
SL2.30ch07_56000000_62220000_6	fimo	sequence_feature	59460535	59460582	1.13e-05	-	2	ID=HMM_SL2.30ch07_56000000_62220000_6_658;Name=HMM_SL2.30ch07_56000000_62220000_6_658;Score=1.13e-05;Sequence=LLILNYGYNSSISSIR
SL2.30ch07_56000000_62220000_6	fimo	sequence_feature	61292731	61292778	1.26e-05	-	2	ID=HMM_SL2.30ch07_56000000_62220000_6_659;Name=HMM_SL2.30ch07_56000000_62220000_6_659;Score=1.26e-05;Sequence=LRTLKLSINLLMRCLP
SL2.30ch07_56000000_62220000_6	fimo	sequence_feature	57868042	57868089	1.26e-05	-	2	ID=HMM_SL2.30ch07_56000000_62220000_6_660;Name=HMM_SL2.30ch07_56000000_62220000_6_660;Score=1.26e-05;Sequence=AGTKQKIDNNLRGEII
SL2.30ch07_56000000_62220000_6	fimo	sequence_feature	58960723	58960770	1.3e-05	-	2	ID=HMM_SL2.30ch07_56000000_62220000_6_661;Name=HMM_SL2.30ch07_56000000_62220000_6_661;Score=1.3e-05;Sequence=STLYSLISNSLIYNIL
SL2.30ch07_56000000_62220000_6	fimo	sequence_feature	60605380	60605427	1.34e-05	-	2	ID=HMM_SL2.30ch07_56000000_62220000_6_662;Name=HMM_SL2.30ch07_56000000_62220000_6_662;Score=1.34e-05;Sequence=LQFLSLFFNRHMVRAL
SL2.30ch07_56000000_62220000_6	fimo	sequence_feature	60669211	60669258	1.41e-05	-	2	ID=HMM_SL2.30ch07_56000000_62220000_6_663;Name=HMM_SL2.30ch07_56000000_62220000_6_663;Score=1.41e-05;Sequence=LLGVVLIFNNVLASIP
SL2.30ch07_56000000_62220000_6	fimo	sequence_feature	58436800	58436847	1.45e-05	-	2	ID=HMM_SL2.30ch07_56000000_62220000_6_664;Name=HMM_SL2.30ch07_56000000_62220000_6_664;Score=1.45e-05;Sequence=LSRTNLFDNTLIFSSL
SL2.30ch07_56000000_62220000_6	fimo	sequence_feature	57968287	57968334	1.45e-05	-	2	ID=HMM_SL2.30ch07_56000000_62220000_6_665;Name=HMM_SL2.30ch07_56000000_62220000_6_665;Score=1.45e-05;Sequence=LLVLDEDDNKLGLLIV
SL2.30ch07_56000000_62220000_6	fimo	sequence_feature	61260922	61260969	1.49e-05	-	2	ID=HMM_SL2.30ch07_56000000_62220000_6_666;Name=HMM_SL2.30ch07_56000000_62220000_6_666;Score=1.49e-05;Sequence=VSVPDIISNLKIGSIP
SL2.30ch07_56000000_62220000_6	fimo	sequence_feature	56139307	56139354	1.62e-05	-	2	ID=HMM_SL2.30ch07_56000000_62220000_6_667;Name=HMM_SL2.30ch07_56000000_62220000_6_667;Score=1.62e-05;Sequence=LTHLNFILLNQNPKIP
SL2.30ch07_56000000_62220000_6	fimo	sequence_feature	60334750	60334797	1.71e-05	-	2	ID=HMM_SL2.30ch07_56000000_62220000_6_668;Name=HMM_SL2.30ch07_56000000_62220000_6_668;Score=1.71e-05;Sequence=LRRLYLNIERLKGNGD
SL2.30ch07_56000000_62220000_6	fimo	sequence_feature	57445591	57445638	1.86e-05	-	2	ID=HMM_SL2.30ch07_56000000_62220000_6_669;Name=HMM_SL2.30ch07_56000000_62220000_6_669;Score=1.86e-05;Sequence=LQVLNFSNFSLSLYFP
SL2.30ch07_56000000_62220000_6	fimo	sequence_feature	61622374	61622421	1.91e-05	-	2	ID=HMM_SL2.30ch07_56000000_62220000_6_670;Name=HMM_SL2.30ch07_56000000_62220000_6_670;Score=1.91e-05;Sequence=LEDLMLVWRRLSHTVP
SL2.30ch07_56000000_62220000_6	fimo	sequence_feature	58480366	58480413	1.91e-05	-	2	ID=HMM_SL2.30ch07_56000000_62220000_6_671;Name=HMM_SL2.30ch07_56000000_62220000_6_671;Score=1.91e-05;Sequence=LTPLDQSHKDQRGKID
SL2.30ch07_56000000_62220000_6	fimo	sequence_feature	56778910	56778957	1.97e-05	-	2	ID=HMM_SL2.30ch07_56000000_62220000_6_672;Name=HMM_SL2.30ch07_56000000_62220000_6_672;Score=1.97e-05;Sequence=LSILPLSNNPLLLNMP
SL2.30ch07_56000000_62220000_6	fimo	sequence_feature	57026677	57026724	2.32e-05	-	2	ID=HMM_SL2.30ch07_56000000_62220000_6_673;Name=HMM_SL2.30ch07_56000000_62220000_6_673;Score=2.32e-05;Sequence=LNVLSQISQRLMGDLM
SL2.30ch07_56000000_62220000_6	fimo	sequence_feature	60137647	60137694	2.38e-05	-	2	ID=HMM_SL2.30ch07_56000000_62220000_6_674;Name=HMM_SL2.30ch07_56000000_62220000_6_674;Score=2.38e-05;Sequence=YSCSDLSSNSFSGALP
SL2.30ch07_56000000_62220000_6	fimo	sequence_feature	57142441	57142488	2.38e-05	-	2	ID=HMM_SL2.30ch07_56000000_62220000_6_675;Name=HMM_SL2.30ch07_56000000_62220000_6_675;Score=2.38e-05;Sequence=LLHMRLSFVHYQGMPP
SL2.30ch07_56000000_62220000_6	fimo	sequence_feature	59253247	59253294	2.45e-05	-	2	ID=HMM_SL2.30ch07_56000000_62220000_6_676;Name=HMM_SL2.30ch07_56000000_62220000_6_676;Score=2.45e-05;Sequence=SSIPNLSFNNLILHMN
SL2.30ch07_56000000_62220000_6	fimo	sequence_feature	60157417	60157464	2.52e-05	-	2	ID=HMM_SL2.30ch07_56000000_62220000_6_677;Name=HMM_SL2.30ch07_56000000_62220000_6_677;Score=2.52e-05;Sequence=LSLASLSLAHLSLPLP
SL2.30ch07_56000000_62220000_6	fimo	sequence_feature	58719517	58719564	2.52e-05	-	2	ID=HMM_SL2.30ch07_56000000_62220000_6_678;Name=HMM_SL2.30ch07_56000000_62220000_6_678;Score=2.52e-05;Sequence=LLLLATYSNSIIGPIF
SL2.30ch07_56000000_62220000_6	fimo	sequence_feature	58333828	58333875	2.52e-05	-	2	ID=HMM_SL2.30ch07_56000000_62220000_6_679;Name=HMM_SL2.30ch07_56000000_62220000_6_679;Score=2.52e-05;Sequence=RDTLSLSNSILVGKII
SL2.30ch07_56000000_62220000_6	fimo	sequence_feature	56959222	56959269	2.52e-05	-	2	ID=HMM_SL2.30ch07_56000000_62220000_6_680;Name=HMM_SL2.30ch07_56000000_62220000_6_680;Score=2.52e-05;Sequence=LSSIDLSEFSLVLHIF
SL2.30ch07_56000000_62220000_6	fimo	sequence_feature	59222071	59222118	2.59e-05	-	2	ID=HMM_SL2.30ch07_56000000_62220000_6_681;Name=HMM_SL2.30ch07_56000000_62220000_6_681;Score=2.59e-05;Sequence=LAKKSSIQRELKGKII
SL2.30ch07_56000000_62220000_6	fimo	sequence_feature	61980478	61980525	2.67e-05	-	2	ID=HMM_SL2.30ch07_56000000_62220000_6_682;Name=HMM_SL2.30ch07_56000000_62220000_6_682;Score=2.67e-05;Sequence=FNLLNISFNNQKGNCL
SL2.30ch07_56000000_62220000_6	fimo	sequence_feature	56495197	56495244	2.67e-05	-	2	ID=HMM_SL2.30ch07_56000000_62220000_6_683;Name=HMM_SL2.30ch07_56000000_62220000_6_683;Score=2.67e-05;Sequence=YNNLVLNENRKNKSIY
SL2.30ch07_56000000_62220000_6	fimo	sequence_feature	57917812	57917859	2.74e-05	-	2	ID=HMM_SL2.30ch07_56000000_62220000_6_684;Name=HMM_SL2.30ch07_56000000_62220000_6_684;Score=2.74e-05;Sequence=LSNLVCSTNEQECSIY
SL2.30ch07_56000000_62220000_6	fimo	sequence_feature	57350533	57350580	2.9e-05	-	2	ID=HMM_SL2.30ch07_56000000_62220000_6_685;Name=HMM_SL2.30ch07_56000000_62220000_6_685;Score=2.9e-05;Sequence=SRKLYLSKNDLINFIV
SL2.30ch07_56000000_62220000_6	fimo	sequence_feature	59702791	59702838	2.99e-05	-	2	ID=HMM_SL2.30ch07_56000000_62220000_6_686;Name=HMM_SL2.30ch07_56000000_62220000_6_686;Score=2.99e-05;Sequence=LLFFSLFSLKVEGEIS
SL2.30ch07_56000000_62220000_6	fimo	sequence_feature	59631346	59631393	2.99e-05	-	2	ID=HMM_SL2.30ch07_56000000_62220000_6_687;Name=HMM_SL2.30ch07_56000000_62220000_6_687;Score=2.99e-05;Sequence=TIYIILYNNKLINHIP
SL2.30ch07_56000000_62220000_6	fimo	sequence_feature	61495783	61495830	3.07e-05	-	2	ID=HMM_SL2.30ch07_56000000_62220000_6_688;Name=HMM_SL2.30ch07_56000000_62220000_6_688;Score=3.07e-05;Sequence=LGKLSGIRLRVKGTDP
SL2.30ch07_56000000_62220000_6	fimo	sequence_feature	56589271	56589318	3.07e-05	-	2	ID=HMM_SL2.30ch07_56000000_62220000_6_689;Name=HMM_SL2.30ch07_56000000_62220000_6_689;Score=3.07e-05;Sequence=FFNLFLKFQLLEGPIP
SL2.30ch07_56000000_62220000_6	fimo	sequence_feature	61049461	61049508	3.16e-05	-	2	ID=HMM_SL2.30ch07_56000000_62220000_6_690;Name=HMM_SL2.30ch07_56000000_62220000_6_690;Score=3.16e-05;Sequence=LTGNYPSHPSLTYPTP
SL2.30ch07_56000000_62220000_6	fimo	sequence_feature	61864651	61864698	3.26e-05	-	2	ID=HMM_SL2.30ch07_56000000_62220000_6_691;Name=HMM_SL2.30ch07_56000000_62220000_6_691;Score=3.26e-05;Sequence=LLTINLSFVSLNWMKI
SL2.30ch07_56000000_62220000_6	fimo	sequence_feature	57846604	57846651	3.26e-05	-	2	ID=HMM_SL2.30ch07_56000000_62220000_6_692;Name=HMM_SL2.30ch07_56000000_62220000_6_692;Score=3.26e-05;Sequence=VGAKKLSNNNLQGKSS
SL2.30ch07_56000000_62220000_6	fimo	sequence_feature	60157411	60157458	3.35e-05	-	2	ID=HMM_SL2.30ch07_56000000_62220000_6_693;Name=HMM_SL2.30ch07_56000000_62220000_6_693;Score=3.35e-05;Sequence=LASLSLAHLSLPLPIS
SL2.30ch07_56000000_62220000_6	fimo	sequence_feature	58430155	58430202	3.45e-05	-	2	ID=HMM_SL2.30ch07_56000000_62220000_6_694;Name=HMM_SL2.30ch07_56000000_62220000_6_694;Score=3.45e-05;Sequence=LKFMDLATNNLTERNQ
SL2.30ch07_56000000_62220000_6	fimo	sequence_feature	56881096	56881143	3.56e-05	-	2	ID=HMM_SL2.30ch07_56000000_62220000_6_695;Name=HMM_SL2.30ch07_56000000_62220000_6_695;Score=3.56e-05;Sequence=SFYLYLRSVHLMLSIP
SL2.30ch07_56000000_62220000_6	fimo	sequence_feature	56556607	56556654	3.77e-05	-	2	ID=HMM_SL2.30ch07_56000000_62220000_6_696;Name=HMM_SL2.30ch07_56000000_62220000_6_696;Score=3.77e-05;Sequence=LRVFLVNWLRLNSRIP
SL2.30ch07_56000000_62220000_6	fimo	sequence_feature	61639096	61639143	3.89e-05	-	2	ID=HMM_SL2.30ch07_56000000_62220000_6_697;Name=HMM_SL2.30ch07_56000000_62220000_6_697;Score=3.89e-05;Sequence=WLVLVLSMNNYQSPLP
SL2.30ch07_56000000_62220000_6	fimo	sequence_feature	61175710	61175757	3.89e-05	-	2	ID=HMM_SL2.30ch07_56000000_62220000_6_698;Name=HMM_SL2.30ch07_56000000_62220000_6_698;Score=3.89e-05;Sequence=TTTLVTTRKSLIFDIP
SL2.30ch07_56000000_62220000_6	fimo	sequence_feature	56439451	56439498	4e-05	-	2	ID=HMM_SL2.30ch07_56000000_62220000_6_699;Name=HMM_SL2.30ch07_56000000_62220000_6_699;Score=4e-05;Sequence=MNIVNLLFHLLIDMIP
SL2.30ch07_56000000_62220000_6	fimo	sequence_feature	61425952	61425999	4.12e-05	-	2	ID=HMM_SL2.30ch07_56000000_62220000_6_700;Name=HMM_SL2.30ch07_56000000_62220000_6_700;Score=4.12e-05;Sequence=LRNFLLSFRHLIGLKC
SL2.30ch07_56000000_62220000_6	fimo	sequence_feature	57410818	57410865	4.12e-05	-	2	ID=HMM_SL2.30ch07_56000000_62220000_6_701;Name=HMM_SL2.30ch07_56000000_62220000_6_701;Score=4.12e-05;Sequence=FVTLDLSTLSVNLHIS
SL2.30ch07_56000000_62220000_6	fimo	sequence_feature	57256810	57256857	4.12e-05	-	2	ID=HMM_SL2.30ch07_56000000_62220000_6_702;Name=HMM_SL2.30ch07_56000000_62220000_6_702;Score=4.12e-05;Sequence=FVTLDLSTLSVNLHIS
SL2.30ch07_56000000_62220000_6	fimo	sequence_feature	56328286	56328333	4.25e-05	-	2	ID=HMM_SL2.30ch07_56000000_62220000_6_703;Name=HMM_SL2.30ch07_56000000_62220000_6_703;Score=4.25e-05;Sequence=LSLLSPSLARLSPPSP
SL2.30ch07_56000000_62220000_6	fimo	sequence_feature	61113733	61113780	4.38e-05	-	2	ID=HMM_SL2.30ch07_56000000_62220000_6_704;Name=HMM_SL2.30ch07_56000000_62220000_6_704;Score=4.38e-05;Sequence=LAPKYLFHRSIGSKIP
SL2.30ch07_56000000_62220000_6	fimo	sequence_feature	58189192	58189239	4.38e-05	-	2	ID=HMM_SL2.30ch07_56000000_62220000_6_705;Name=HMM_SL2.30ch07_56000000_62220000_6_705;Score=4.38e-05;Sequence=LSYQHLSHNKTPGNKI
SL2.30ch07_56000000_62220000_6	fimo	sequence_feature	59553043	59553090	4.51e-05	-	2	ID=HMM_SL2.30ch07_56000000_62220000_6_706;Name=HMM_SL2.30ch07_56000000_62220000_6_706;Score=4.51e-05;Sequence=LNAYRLIVNTLIQKII
SL2.30ch07_56000000_62220000_6	fimo	sequence_feature	59208469	59208516	4.51e-05	-	2	ID=HMM_SL2.30ch07_56000000_62220000_6_707;Name=HMM_SL2.30ch07_56000000_62220000_6_707;Score=4.51e-05;Sequence=TTRLLHSTNNKEGNIQ
SL2.30ch07_56000000_62220000_6	fimo	sequence_feature	59175547	59175594	4.51e-05	-	2	ID=HMM_SL2.30ch07_56000000_62220000_6_708;Name=HMM_SL2.30ch07_56000000_62220000_6_708;Score=4.51e-05;Sequence=NLFLNQAYIHLNSKIE
SL2.30ch07_56000000_62220000_6	fimo	sequence_feature	61625572	61625619	4.65e-05	-	2	ID=HMM_SL2.30ch07_56000000_62220000_6_709;Name=HMM_SL2.30ch07_56000000_62220000_6_709;Score=4.65e-05;Sequence=LEDLMLVGRRLSHTVP
SL2.30ch07_56000000_62220000_6	fimo	sequence_feature	59298733	59298780	4.65e-05	-	2	ID=HMM_SL2.30ch07_56000000_62220000_6_710;Name=HMM_SL2.30ch07_56000000_62220000_6_710;Score=4.65e-05;Sequence=LWVTSLIRYHLCEPIM
SL2.30ch07_56000000_62220000_6	fimo	sequence_feature	58887052	58887099	4.65e-05	-	2	ID=HMM_SL2.30ch07_56000000_62220000_6_711;Name=HMM_SL2.30ch07_56000000_62220000_6_711;Score=4.65e-05;Sequence=LSLVVSKTNNDSSKIP
SL2.30ch07_56000000_62220000_6	fimo	sequence_feature	57667054	57667101	4.65e-05	-	2	ID=HMM_SL2.30ch07_56000000_62220000_6_712;Name=HMM_SL2.30ch07_56000000_62220000_6_712;Score=4.65e-05;Sequence=FILNYLSYFSLIYTII
SL2.30ch07_56000000_62220000_6	fimo	sequence_feature	61553554	61553601	4.79e-05	-	2	ID=HMM_SL2.30ch07_56000000_62220000_6_713;Name=HMM_SL2.30ch07_56000000_62220000_6_713;Score=4.79e-05;Sequence=LHKLSLNKNHRNGFNI
SL2.30ch07_56000000_62220000_6	fimo	sequence_feature	61202734	61202781	4.94e-05	-	2	ID=HMM_SL2.30ch07_56000000_62220000_6_714;Name=HMM_SL2.30ch07_56000000_62220000_6_714;Score=4.94e-05;Sequence=QEQNYSFQNSLILKIL
SL2.30ch07_56000000_62220000_6	fimo	sequence_feature	59272015	59272062	5.09e-05	-	2	ID=HMM_SL2.30ch07_56000000_62220000_6_715;Name=HMM_SL2.30ch07_56000000_62220000_6_715;Score=5.09e-05;Sequence=AHQDNLIATRLIGQYP
SL2.30ch07_56000000_62220000_6	fimo	sequence_feature	57417520	57417567	5.09e-05	-	2	ID=HMM_SL2.30ch07_56000000_62220000_6_716;Name=HMM_SL2.30ch07_56000000_62220000_6_716;Score=5.09e-05;Sequence=VTQLQLSNFHLEKPFV
SL2.30ch07_56000000_62220000_6	fimo	sequence_feature	57233353	57233400	5.09e-05	-	2	ID=HMM_SL2.30ch07_56000000_62220000_6_717;Name=HMM_SL2.30ch07_56000000_62220000_6_717;Score=5.09e-05;Sequence=QIILDASNMSLILPVP
SL2.30ch07_56000000_62220000_6	fimo	sequence_feature	61424908	61424955	5.25e-05	-	2	ID=HMM_SL2.30ch07_56000000_62220000_6_718;Name=HMM_SL2.30ch07_56000000_62220000_6_718;Score=5.25e-05;Sequence=ISILNLSGIHLYGLLT
SL2.30ch07_56000000_62220000_6	fimo	sequence_feature	61143187	61143234	5.25e-05	-	2	ID=HMM_SL2.30ch07_56000000_62220000_6_719;Name=HMM_SL2.30ch07_56000000_62220000_6_719;Score=5.25e-05;Sequence=LLLLNQMHKTNVDQIP
SL2.30ch07_56000000_62220000_6	fimo	sequence_feature	59104912	59104959	5.25e-05	-	2	ID=HMM_SL2.30ch07_56000000_62220000_6_720;Name=HMM_SL2.30ch07_56000000_62220000_6_720;Score=5.25e-05;Sequence=LLYHQARSNNTNGTIF
SL2.30ch07_56000000_62220000_6	fimo	sequence_feature	56826664	56826711	5.25e-05	-	2	ID=HMM_SL2.30ch07_56000000_62220000_6_721;Name=HMM_SL2.30ch07_56000000_62220000_6_721;Score=5.25e-05;Sequence=LVCLQMSTNSSSLRIC
SL2.30ch07_56000000_62220000_6	fimo	sequence_feature	56289889	56289936	5.25e-05	-	2	ID=HMM_SL2.30ch07_56000000_62220000_6_722;Name=HMM_SL2.30ch07_56000000_62220000_6_722;Score=5.25e-05;Sequence=LSVGVLVITLLIGHIF
SL2.30ch07_56000000_62220000_6	fimo	sequence_feature	61800667	61800714	5.41e-05	-	2	ID=HMM_SL2.30ch07_56000000_62220000_6_723;Name=HMM_SL2.30ch07_56000000_62220000_6_723;Score=5.41e-05;Sequence=LATYLLSRNLFTSLTP
SL2.30ch07_56000000_62220000_6	fimo	sequence_feature	60078805	60078852	5.41e-05	-	2	ID=HMM_SL2.30ch07_56000000_62220000_6_724;Name=HMM_SL2.30ch07_56000000_62220000_6_724;Score=5.41e-05;Sequence=TETLRYIFNQLTDQVP
SL2.30ch07_56000000_62220000_6	fimo	sequence_feature	58255537	58255584	5.41e-05	-	2	ID=HMM_SL2.30ch07_56000000_62220000_6_725;Name=HMM_SL2.30ch07_56000000_62220000_6_725;Score=5.41e-05;Sequence=LGVENLKGINLKREIV
SL2.30ch07_56000000_62220000_6	fimo	sequence_feature	57537715	57537762	5.41e-05	-	2	ID=HMM_SL2.30ch07_56000000_62220000_6_726;Name=HMM_SL2.30ch07_56000000_62220000_6_726;Score=5.41e-05;Sequence=LQQEFDSDNLVMGRSP
SL2.30ch07_56000000_62220000_6	fimo	sequence_feature	57475408	57475455	5.41e-05	-	2	ID=HMM_SL2.30ch07_56000000_62220000_6_727;Name=HMM_SL2.30ch07_56000000_62220000_6_727;Score=5.41e-05;Sequence=LQVLNFSNSSLSHQFL
SL2.30ch07_56000000_62220000_6	fimo	sequence_feature	57020788	57020835	5.58e-05	-	2	ID=HMM_SL2.30ch07_56000000_62220000_6_728;Name=HMM_SL2.30ch07_56000000_62220000_6_728;Score=5.58e-05;Sequence=RNKTYISSNSINGDTP
SL2.30ch07_56000000_62220000_6	fimo	sequence_feature	56093260	56093307	5.58e-05	-	2	ID=HMM_SL2.30ch07_56000000_62220000_6_729;Name=HMM_SL2.30ch07_56000000_62220000_6_729;Score=5.58e-05;Sequence=SFDLQNGSNWLSGPIV
SL2.30ch07_56000000_62220000_6	fimo	sequence_feature	57856897	57856944	5.75e-05	-	2	ID=HMM_SL2.30ch07_56000000_62220000_6_730;Name=HMM_SL2.30ch07_56000000_62220000_6_730;Score=5.75e-05;Sequence=LQLYSLSQISQSYKIE
SL2.30ch07_56000000_62220000_6	fimo	sequence_feature	61395952	61395999	5.93e-05	-	2	ID=HMM_SL2.30ch07_56000000_62220000_6_731;Name=HMM_SL2.30ch07_56000000_62220000_6_731;Score=5.93e-05;Sequence=LVYLVLFHIWQKVHIN
SL2.30ch07_56000000_62220000_6	fimo	sequence_feature	59834944	59834991	5.93e-05	-	2	ID=HMM_SL2.30ch07_56000000_62220000_6_732;Name=HMM_SL2.30ch07_56000000_62220000_6_732;Score=5.93e-05;Sequence=KHTKSLSYNLLVGVHL
SL2.30ch07_56000000_62220000_6	fimo	sequence_feature	59080717	59080764	5.93e-05	-	2	ID=HMM_SL2.30ch07_56000000_62220000_6_733;Name=HMM_SL2.30ch07_56000000_62220000_6_733;Score=5.93e-05;Sequence=LTTLNLNGSCLSQRFL
SL2.30ch07_56000000_62220000_6	fimo	sequence_feature	58015423	58015470	5.93e-05	-	2	ID=HMM_SL2.30ch07_56000000_62220000_6_734;Name=HMM_SL2.30ch07_56000000_62220000_6_734;Score=5.93e-05;Sequence=LARLSPPFLNLSCHIY
SL2.30ch07_56000000_62220000_6	fimo	sequence_feature	62066572	62066619	6.11e-05	-	2	ID=HMM_SL2.30ch07_56000000_62220000_6_735;Name=HMM_SL2.30ch07_56000000_62220000_6_735;Score=6.11e-05;Sequence=LLHLTKSSNEEKWTIE
SL2.30ch07_56000000_62220000_6	fimo	sequence_feature	60487405	60487452	6.11e-05	-	2	ID=HMM_SL2.30ch07_56000000_62220000_6_736;Name=HMM_SL2.30ch07_56000000_62220000_6_736;Score=6.11e-05;Sequence=LIICGLSYNKLIIDLK
SL2.30ch07_56000000_62220000_6	fimo	sequence_feature	59360041	59360088	6.11e-05	-	2	ID=HMM_SL2.30ch07_56000000_62220000_6_737;Name=HMM_SL2.30ch07_56000000_62220000_6_737;Score=6.11e-05;Sequence=RIESEISENNLIGNIV
SL2.30ch07_56000000_62220000_6	fimo	sequence_feature	56930524	56930571	6.11e-05	-	2	ID=HMM_SL2.30ch07_56000000_62220000_6_738;Name=HMM_SL2.30ch07_56000000_62220000_6_738;Score=6.11e-05;Sequence=TSKQGVINNSLNQMIP
SL2.30ch07_56000000_62220000_6	fimo	sequence_feature	56620723	56620770	6.11e-05	-	2	ID=HMM_SL2.30ch07_56000000_62220000_6_739;Name=HMM_SL2.30ch07_56000000_62220000_6_739;Score=6.11e-05;Sequence=LSNNDSRCNLLTVTIL
SL2.30ch07_56000000_62220000_6	fimo	sequence_feature	61872571	61872618	6.49e-05	-	2	ID=HMM_SL2.30ch07_56000000_62220000_6_740;Name=HMM_SL2.30ch07_56000000_62220000_6_740;Score=6.49e-05;Sequence=LIWLNTNYNLLNLKYE
SL2.30ch07_56000000_62220000_6	fimo	sequence_feature	56328295	56328342	6.49e-05	-	2	ID=HMM_SL2.30ch07_56000000_62220000_6_741;Name=HMM_SL2.30ch07_56000000_62220000_6_741;Score=6.49e-05;Sequence=LAHLSLLSPSLARLSP
SL2.30ch07_56000000_62220000_6	fimo	sequence_feature	56328265	56328312	6.49e-05	-	2	ID=HMM_SL2.30ch07_56000000_62220000_6_742;Name=HMM_SL2.30ch07_56000000_62220000_6_742;Score=6.49e-05;Sequence=LARLSPPSPNLSYHIY
SL2.30ch07_56000000_62220000_6	fimo	sequence_feature	58678795	58678842	6.69e-05	-	2	ID=HMM_SL2.30ch07_56000000_62220000_6_743;Name=HMM_SL2.30ch07_56000000_62220000_6_743;Score=6.69e-05;Sequence=NRFLDLNYHLDTATII
SL2.30ch07_56000000_62220000_6	fimo	sequence_feature	58360477	58360524	6.69e-05	-	2	ID=HMM_SL2.30ch07_56000000_62220000_6_744;Name=HMM_SL2.30ch07_56000000_62220000_6_744;Score=6.69e-05;Sequence=FINNFLSFFSLGGTIL
SL2.30ch07_56000000_62220000_6	fimo	sequence_feature	62073235	62073282	6.89e-05	-	2	ID=HMM_SL2.30ch07_56000000_62220000_6_745;Name=HMM_SL2.30ch07_56000000_62220000_6_745;Score=6.89e-05;Sequence=LLNLQNMDVHLIHMIY
SL2.30ch07_56000000_62220000_6	fimo	sequence_feature	61144135	61144182	6.89e-05	-	2	ID=HMM_SL2.30ch07_56000000_62220000_6_746;Name=HMM_SL2.30ch07_56000000_62220000_6_746;Score=6.89e-05;Sequence=LSLSHLSCKQNELTIY
SL2.30ch07_56000000_62220000_6	fimo	sequence_feature	60100780	60100827	7.11e-05	-	2	ID=HMM_SL2.30ch07_56000000_62220000_6_747;Name=HMM_SL2.30ch07_56000000_62220000_6_747;Score=7.11e-05;Sequence=VSGLHQFLHSLICKIP
SL2.30ch07_56000000_62220000_6	fimo	sequence_feature	58306621	58306668	7.11e-05	-	2	ID=HMM_SL2.30ch07_56000000_62220000_6_748;Name=HMM_SL2.30ch07_56000000_62220000_6_748;Score=7.11e-05;Sequence=LNQDVLSSSSFKYKII
SL2.30ch07_56000000_62220000_6	fimo	sequence_feature	57291844	57291891	7.11e-05	-	2	ID=HMM_SL2.30ch07_56000000_62220000_6_749;Name=HMM_SL2.30ch07_56000000_62220000_6_749;Score=7.11e-05;Sequence=LLNLCLFDRVLFLHIR
SL2.30ch07_56000000_62220000_6	fimo	sequence_feature	60536899	60536946	7.32e-05	-	2	ID=HMM_SL2.30ch07_56000000_62220000_6_750;Name=HMM_SL2.30ch07_56000000_62220000_6_750;Score=7.32e-05;Sequence=LLLRNLIQNRILKLIK
SL2.30ch07_56000000_62220000_6	fimo	sequence_feature	57787528	57787575	7.32e-05	-	2	ID=HMM_SL2.30ch07_56000000_62220000_6_751;Name=HMM_SL2.30ch07_56000000_62220000_6_751;Score=7.32e-05;Sequence=LTALVLSHMRGIALMW
SL2.30ch07_56000000_62220000_6	fimo	sequence_feature	57347689	57347736	7.32e-05	-	2	ID=HMM_SL2.30ch07_56000000_62220000_6_752;Name=HMM_SL2.30ch07_56000000_62220000_6_752;Score=7.32e-05;Sequence=LVALLLSQNHSPSYDP
SL2.30ch07_56000000_62220000_6	fimo	sequence_feature	56041384	56041431	7.54e-05	-	2	ID=HMM_SL2.30ch07_56000000_62220000_6_753;Name=HMM_SL2.30ch07_56000000_62220000_6_753;Score=7.54e-05;Sequence=LLSVHQFQNDLSFKIS
SL2.30ch07_56000000_62220000_6	fimo	sequence_feature	58392733	58392780	7.77e-05	-	2	ID=HMM_SL2.30ch07_56000000_62220000_6_754;Name=HMM_SL2.30ch07_56000000_62220000_6_754;Score=7.77e-05;Sequence=SWYLLLNSVRLSALIG
SL2.30ch07_56000000_62220000_6	fimo	sequence_feature	58156423	58156470	7.77e-05	-	2	ID=HMM_SL2.30ch07_56000000_62220000_6_755;Name=HMM_SL2.30ch07_56000000_62220000_6_755;Score=7.77e-05;Sequence=PEGLDYSSLLLVQMIL
SL2.30ch07_56000000_62220000_6	fimo	sequence_feature	58118119	58118166	7.77e-05	-	2	ID=HMM_SL2.30ch07_56000000_62220000_6_756;Name=HMM_SL2.30ch07_56000000_62220000_6_756;Score=7.77e-05;Sequence=LVHWNCNNNFAHGAIH
SL2.30ch07_56000000_62220000_6	fimo	sequence_feature	57537661	57537708	7.77e-05	-	2	ID=HMM_SL2.30ch07_56000000_62220000_6_757;Name=HMM_SL2.30ch07_56000000_62220000_6_757;Score=7.77e-05;Sequence=KEQRVLKSKDLVGMIQ
SL2.30ch07_56000000_62220000_6	fimo	sequence_feature	57278203	57278250	7.77e-05	-	2	ID=HMM_SL2.30ch07_56000000_62220000_6_758;Name=HMM_SL2.30ch07_56000000_62220000_6_758;Score=7.77e-05;Sequence=LTRRSTFDCMLAGSIP
SL2.30ch07_56000000_62220000_6	fimo	sequence_feature	60389485	60389532	8.01e-05	-	2	ID=HMM_SL2.30ch07_56000000_62220000_6_759;Name=HMM_SL2.30ch07_56000000_62220000_6_759;Score=8.01e-05;Sequence=LEALVSFRFSLETFKP
SL2.30ch07_56000000_62220000_6	fimo	sequence_feature	59934118	59934165	8.01e-05	-	2	ID=HMM_SL2.30ch07_56000000_62220000_6_760;Name=HMM_SL2.30ch07_56000000_62220000_6_760;Score=8.01e-05;Sequence=LRILSLSFLSLVFFCM
SL2.30ch07_56000000_62220000_6	fimo	sequence_feature	61770445	61770492	8.25e-05	-	2	ID=HMM_SL2.30ch07_56000000_62220000_6_761;Name=HMM_SL2.30ch07_56000000_62220000_6_761;Score=8.25e-05;Sequence=LSRRYLGQLGRTTTIP
SL2.30ch07_56000000_62220000_6	fimo	sequence_feature	57803065	57803112	8.25e-05	-	2	ID=HMM_SL2.30ch07_56000000_62220000_6_762;Name=HMM_SL2.30ch07_56000000_62220000_6_762;Score=8.25e-05;Sequence=IIHNHLNYLNYTGEIN
SL2.30ch07_56000000_62220000_6	fimo	sequence_feature	56495218	56495265	8.25e-05	-	2	ID=HMM_SL2.30ch07_56000000_62220000_6_763;Name=HMM_SL2.30ch07_56000000_62220000_6_763;Score=8.25e-05;Sequence=ILLQYLSYNNLVLNEN
SL2.30ch07_56000000_62220000_6	fimo	sequence_feature	56366566	56366613	8.25e-05	-	2	ID=HMM_SL2.30ch07_56000000_62220000_6_764;Name=HMM_SL2.30ch07_56000000_62220000_6_764;Score=8.25e-05;Sequence=ASILNTNHLNLMGERS
SL2.30ch07_56000000_62220000_6	fimo	sequence_feature	58614199	58614246	8.49e-05	-	2	ID=HMM_SL2.30ch07_56000000_62220000_6_765;Name=HMM_SL2.30ch07_56000000_62220000_6_765;Score=8.49e-05;Sequence=LTTLHTISKYLEKTVP
SL2.30ch07_56000000_62220000_6	fimo	sequence_feature	57964102	57964149	8.49e-05	-	2	ID=HMM_SL2.30ch07_56000000_62220000_6_766;Name=HMM_SL2.30ch07_56000000_62220000_6_766;Score=8.49e-05;Sequence=LQNLFSSTNLPVWMPP
SL2.30ch07_56000000_62220000_6	fimo	sequence_feature	57598804	57598851	8.49e-05	-	2	ID=HMM_SL2.30ch07_56000000_62220000_6_767;Name=HMM_SL2.30ch07_56000000_62220000_6_767;Score=8.49e-05;Sequence=DRLPRLIFNRERGDLP
SL2.30ch07_56000000_62220000_6	fimo	sequence_feature	57540745	57540792	8.49e-05	-	2	ID=HMM_SL2.30ch07_56000000_62220000_6_768;Name=HMM_SL2.30ch07_56000000_62220000_6_768;Score=8.49e-05;Sequence=LHFLNHRMRNLTKHIK
SL2.30ch07_56000000_62220000_6	fimo	sequence_feature	57506422	57506469	8.49e-05	-	2	ID=HMM_SL2.30ch07_56000000_62220000_6_769;Name=HMM_SL2.30ch07_56000000_62220000_6_769;Score=8.49e-05;Sequence=LHFLNHRMSNLTKHIK
SL2.30ch07_56000000_62220000_6	fimo	sequence_feature	59428261	59428308	8.75e-05	-	2	ID=HMM_SL2.30ch07_56000000_62220000_6_770;Name=HMM_SL2.30ch07_56000000_62220000_6_770;Score=8.75e-05;Sequence=LLFLHLLHTSLHQAQM
SL2.30ch07_56000000_62220000_6	fimo	sequence_feature	58177567	58177614	8.75e-05	-	2	ID=HMM_SL2.30ch07_56000000_62220000_6_771;Name=HMM_SL2.30ch07_56000000_62220000_6_771;Score=8.75e-05;Sequence=YNISYLSENSLSQPYE
SL2.30ch07_56000000_62220000_6	fimo	sequence_feature	58174981	58175028	8.75e-05	-	2	ID=HMM_SL2.30ch07_56000000_62220000_6_772;Name=HMM_SL2.30ch07_56000000_62220000_6_772;Score=8.75e-05;Sequence=SLLLELSEISSGGDAP
SL2.30ch07_56000000_62220000_6	fimo	sequence_feature	61627987	61628034	9.01e-05	-	2	ID=HMM_SL2.30ch07_56000000_62220000_6_773;Name=HMM_SL2.30ch07_56000000_62220000_6_773;Score=9.01e-05;Sequence=FTDLMLIRQRLSHTVP
SL2.30ch07_56000000_62220000_6	fimo	sequence_feature	61074403	61074450	9.27e-05	-	2	ID=HMM_SL2.30ch07_56000000_62220000_6_774;Name=HMM_SL2.30ch07_56000000_62220000_6_774;Score=9.27e-05;Sequence=LKRLNLGYNAGLGGIL
SL2.30ch07_56000000_62220000_6	fimo	sequence_feature	59409547	59409594	9.27e-05	-	2	ID=HMM_SL2.30ch07_56000000_62220000_6_775;Name=HMM_SL2.30ch07_56000000_62220000_6_775;Score=9.27e-05;Sequence=IHILILSYDLLINLIS
SL2.30ch07_56000000_62220000_6	fimo	sequence_feature	58658515	58658562	9.27e-05	-	2	ID=HMM_SL2.30ch07_56000000_62220000_6_776;Name=HMM_SL2.30ch07_56000000_62220000_6_776;Score=9.27e-05;Sequence=LTILLLNFQILIGLGA
SL2.30ch07_56000000_62220000_6	fimo	sequence_feature	60453022	60453069	9.55e-05	-	2	ID=HMM_SL2.30ch07_56000000_62220000_6_777;Name=HMM_SL2.30ch07_56000000_62220000_6_777;Score=9.55e-05;Sequence=TNLLSTVSYSLQGRIH
SL2.30ch07_56000000_62220000_6	fimo	sequence_feature	56954641	56954688	9.55e-05	-	2	ID=HMM_SL2.30ch07_56000000_62220000_6_778;Name=HMM_SL2.30ch07_56000000_62220000_6_778;Score=9.55e-05;Sequence=LSYKYLFQMQQSSKIY
SL2.30ch07_56000000_62220000_6	fimo	sequence_feature	58922614	58922661	9.82e-05	-	2	ID=HMM_SL2.30ch07_56000000_62220000_6_779;Name=HMM_SL2.30ch07_56000000_62220000_6_779;Score=9.82e-05;Sequence=FLHLDLISRHLIKKKR
SL2.30ch07_56000000_62220000_6	fimo	sequence_feature	58419535	58419582	9.82e-05	-	2	ID=HMM_SL2.30ch07_56000000_62220000_6_780;Name=HMM_SL2.30ch07_56000000_62220000_6_780;Score=9.82e-05;Sequence=LGVTYLRSPRLSGKWR
SL2.30ch07_56000000_62220000_6	fimo	sequence_feature	58165975	58166022	9.82e-05	-	2	ID=HMM_SL2.30ch07_56000000_62220000_6_781;Name=HMM_SL2.30ch07_56000000_62220000_6_781;Score=9.82e-05;Sequence=LRKLHQLRLTLNPHIR
SL2.30ch07_56000000_62220000_6	fimo	sequence_feature	57945325	57945372	9.82e-05	-	2	ID=HMM_SL2.30ch07_56000000_62220000_6_782;Name=HMM_SL2.30ch07_56000000_62220000_6_782;Score=9.82e-05;Sequence=TSFLQLSSYHLHKAPD
SL2.30ch11_1140000_1870000_1	fimo	sequence_feature	1187628	1187675	5.88e-07	+	0	ID=HMM_SL2.30ch11_1140000_1870000_1_783;Name=HMM_SL2.30ch11_1140000_1870000_1_783;Score=5.88e-07;Sequence=LVYDNLNFFRLGGKIS
SL2.30ch11_1140000_1870000_1	fimo	sequence_feature	1193763	1193810	2.23e-06	+	0	ID=HMM_SL2.30ch11_1140000_1870000_1_784;Name=HMM_SL2.30ch11_1140000_1870000_1_784;Score=2.23e-06;Sequence=LSLPMLSHNTLSCSIF
SL2.30ch11_1140000_1870000_1	fimo	sequence_feature	1583547	1583594	1.86e-05	+	0	ID=HMM_SL2.30ch11_1140000_1870000_1_785;Name=HMM_SL2.30ch11_1140000_1870000_1_785;Score=1.86e-05;Sequence=LILFYLIGVVLFGEIK
SL2.30ch11_1140000_1870000_1	fimo	sequence_feature	1599243	1599290	2.13e-05	+	0	ID=HMM_SL2.30ch11_1140000_1870000_1_786;Name=HMM_SL2.30ch11_1140000_1870000_1_786;Score=2.13e-05;Sequence=YSYLVLPHIHLINHIF
SL2.30ch11_1140000_1870000_1	fimo	sequence_feature	1239762	1239809	2.19e-05	+	0	ID=HMM_SL2.30ch11_1140000_1870000_1_787;Name=HMM_SL2.30ch11_1140000_1870000_1_787;Score=2.19e-05;Sequence=LEQLKLIDFHELEEIP
SL2.30ch11_1140000_1870000_1	fimo	sequence_feature	1186968	1187015	2.45e-05	+	0	ID=HMM_SL2.30ch11_1140000_1870000_1_788;Name=HMM_SL2.30ch11_1140000_1870000_1_788;Score=2.45e-05;Sequence=LNHRSLNSNDLKTEFE
SL2.30ch11_1140000_1870000_1	fimo	sequence_feature	1756194	1756241	3.16e-05	+	0	ID=HMM_SL2.30ch11_1140000_1870000_1_789;Name=HMM_SL2.30ch11_1140000_1870000_1_789;Score=3.16e-05;Sequence=FFVLYLSFHSIHREIP
SL2.30ch11_1140000_1870000_1	fimo	sequence_feature	1720233	1720280	3.45e-05	+	0	ID=HMM_SL2.30ch11_1140000_1870000_1_790;Name=HMM_SL2.30ch11_1140000_1870000_1_790;Score=3.45e-05;Sequence=LNLLSLSCNITSEKSL
SL2.30ch11_1140000_1870000_1	fimo	sequence_feature	1596774	1596821	7.11e-05	+	0	ID=HMM_SL2.30ch11_1140000_1870000_1_791;Name=HMM_SL2.30ch11_1140000_1870000_1_791;Score=7.11e-05;Sequence=LVTNNNNNNNLNQRLR
SL2.30ch11_1140000_1870000_1	fimo	sequence_feature	1719771	1719818	7.32e-05	+	0	ID=HMM_SL2.30ch11_1140000_1870000_1_792;Name=HMM_SL2.30ch11_1140000_1870000_1_792;Score=7.32e-05;Sequence=LSTLDLICAALIDEGG
SL2.30ch11_1140000_1870000_1	fimo	sequence_feature	1314636	1314683	7.54e-05	+	0	ID=HMM_SL2.30ch11_1140000_1870000_1_793;Name=HMM_SL2.30ch11_1140000_1870000_1_793;Score=7.54e-05;Sequence=LLQSNNICPSLTRHIF
SL2.30ch11_1140000_1870000_1	fimo	sequence_feature	1538592	1538639	8.25e-05	+	0	ID=HMM_SL2.30ch11_1140000_1870000_1_794;Name=HMM_SL2.30ch11_1140000_1870000_1_794;Score=8.25e-05;Sequence=LVFFPDSNNTLRRQKP
SL2.30ch11_1140000_1870000_1	fimo	sequence_feature	1606521	1606568	8.25e-05	+	0	ID=HMM_SL2.30ch11_1140000_1870000_1_795;Name=HMM_SL2.30ch11_1140000_1870000_1_795;Score=8.25e-05;Sequence=HGYKSLGWNSALTNIP
SL2.30ch11_1140000_1870000_1	fimo	sequence_feature	1182207	1182254	8.75e-05	+	0	ID=HMM_SL2.30ch11_1140000_1870000_1_796;Name=HMM_SL2.30ch11_1140000_1870000_1_796;Score=8.75e-05;Sequence=ILLLNVIFLILQGKIS
SL2.30ch11_1140000_1870000_1	fimo	sequence_feature	1504992	1505039	8.75e-05	+	0	ID=HMM_SL2.30ch11_1140000_1870000_1_797;Name=HMM_SL2.30ch11_1140000_1870000_1_797;Score=8.75e-05;Sequence=KELMHESDNESMESIP
SL2.30ch11_1140000_1870000_1	fimo	sequence_feature	1589832	1589879	9.27e-05	+	0	ID=HMM_SL2.30ch11_1140000_1870000_1_798;Name=HMM_SL2.30ch11_1140000_1870000_1_798;Score=9.27e-05;Sequence=LQQMVLFFLSLVLYIN
SL2.30ch11_1140000_1870000_1	fimo	sequence_feature	1810977	1811024	9.55e-05	+	0	ID=HMM_SL2.30ch11_1140000_1870000_1_799;Name=HMM_SL2.30ch11_1140000_1870000_1_799;Score=9.55e-05;Sequence=CIRLNIFDLQLIGTCT
SL2.30ch11_1140000_1870000_2	fimo	sequence_feature	1684510	1684557	7.36e-06	+	1	ID=HMM_SL2.30ch11_1140000_1870000_2_800;Name=HMM_SL2.30ch11_1140000_1870000_2_800;Score=7.36e-06;Sequence=LVELTLLRNSLVGLPG
SL2.30ch11_1140000_1870000_2	fimo	sequence_feature	1157752	1157799	2.52e-05	+	1	ID=HMM_SL2.30ch11_1140000_1870000_2_801;Name=HMM_SL2.30ch11_1140000_1870000_2_801;Score=2.52e-05;Sequence=NSFTNLSSNQLIPRYT
SL2.30ch11_1140000_1870000_2	fimo	sequence_feature	1378003	1378050	2.52e-05	+	1	ID=HMM_SL2.30ch11_1140000_1870000_2_802;Name=HMM_SL2.30ch11_1140000_1870000_2_802;Score=2.52e-05;Sequence=LLLKNLLFQHLNFKIL
SL2.30ch11_1140000_1870000_2	fimo	sequence_feature	1780102	1780149	2.74e-05	+	1	ID=HMM_SL2.30ch11_1140000_1870000_2_803;Name=HMM_SL2.30ch11_1140000_1870000_2_803;Score=2.74e-05;Sequence=LIKPNLSNIMLIKPNP
SL2.30ch11_1140000_1870000_2	fimo	sequence_feature	1172362	1172409	3.16e-05	+	1	ID=HMM_SL2.30ch11_1140000_1870000_2_804;Name=HMM_SL2.30ch11_1140000_1870000_2_804;Score=3.16e-05;Sequence=LNYYNYSSSRNVGETP
SL2.30ch11_1140000_1870000_2	fimo	sequence_feature	1284274	1284321	3.35e-05	+	1	ID=HMM_SL2.30ch11_1140000_1870000_2_805;Name=HMM_SL2.30ch11_1140000_1870000_2_805;Score=3.35e-05;Sequence=LHHLFLEYNKIQQRIS
SL2.30ch11_1140000_1870000_2	fimo	sequence_feature	1310071	1310118	6.49e-05	+	1	ID=HMM_SL2.30ch11_1140000_1870000_2_806;Name=HMM_SL2.30ch11_1140000_1870000_2_806;Score=6.49e-05;Sequence=LTEYDESHDKLMINFP
SL2.30ch11_1140000_1870000_2	fimo	sequence_feature	1572823	1572870	6.69e-05	+	1	ID=HMM_SL2.30ch11_1140000_1870000_2_807;Name=HMM_SL2.30ch11_1140000_1870000_2_807;Score=6.69e-05;Sequence=NLLLNTSNMTLKKHFP
SL2.30ch11_1140000_1870000_2	fimo	sequence_feature	1652572	1652619	6.69e-05	+	1	ID=HMM_SL2.30ch11_1140000_1870000_2_808;Name=HMM_SL2.30ch11_1140000_1870000_2_808;Score=6.69e-05;Sequence=LAELGLARRSLATRYP
SL2.30ch11_1140000_1870000_2	fimo	sequence_feature	1751251	1751298	7.54e-05	+	1	ID=HMM_SL2.30ch11_1140000_1870000_2_809;Name=HMM_SL2.30ch11_1140000_1870000_2_809;Score=7.54e-05;Sequence=LSHLSLNLAHLSHPYN
SL2.30ch11_1140000_1870000_2	fimo	sequence_feature	1507441	1507488	8.25e-05	+	1	ID=HMM_SL2.30ch11_1140000_1870000_2_810;Name=HMM_SL2.30ch11_1140000_1870000_2_810;Score=8.25e-05;Sequence=IEFSVLGCNYLTYLID
SL2.30ch11_1140000_1870000_2	fimo	sequence_feature	1460671	1460718	8.75e-05	+	1	ID=HMM_SL2.30ch11_1140000_1870000_2_811;Name=HMM_SL2.30ch11_1140000_1870000_2_811;Score=8.75e-05;Sequence=LLFLNFAQGESILMIS
SL2.30ch11_1140000_1870000_2	fimo	sequence_feature	1727329	1727376	9.27e-05	+	1	ID=HMM_SL2.30ch11_1140000_1870000_2_812;Name=HMM_SL2.30ch11_1140000_1870000_2_812;Score=9.27e-05;Sequence=VRLPYLSRHSLIYLIS
SL2.30ch11_1140000_1870000_2	fimo	sequence_feature	1351837	1351884	9.55e-05	+	1	ID=HMM_SL2.30ch11_1140000_1870000_2_813;Name=HMM_SL2.30ch11_1140000_1870000_2_813;Score=9.55e-05;Sequence=LHKGVLSHNKNKKTVK
SL2.30ch11_1140000_1870000_3	fimo	sequence_feature	1801016	1801063	3.2e-07	+	2	ID=HMM_SL2.30ch11_1140000_1870000_3_814;Name=HMM_SL2.30ch11_1140000_1870000_3_814;Score=3.2e-07;Sequence=LNFPQLSRLVLVGNLP
SL2.30ch11_1140000_1870000_3	fimo	sequence_feature	1864988	1865035	7.54e-07	+	2	ID=HMM_SL2.30ch11_1140000_1870000_3_815;Name=HMM_SL2.30ch11_1140000_1870000_3_815;Score=7.54e-07;Sequence=LVNIYLNYNVSTGRIH
SL2.30ch11_1140000_1870000_3	fimo	sequence_feature	1623602	1623649	8.61e-06	+	2	ID=HMM_SL2.30ch11_1140000_1870000_3_816;Name=HMM_SL2.30ch11_1140000_1870000_3_816;Score=8.61e-06;Sequence=LVQLNSFSNTLTYECC
SL2.30ch11_1140000_1870000_3	fimo	sequence_feature	1801031	1801078	1.37e-05	+	2	ID=HMM_SL2.30ch11_1140000_1870000_3_817;Name=HMM_SL2.30ch11_1140000_1870000_3_817;Score=1.37e-05;Sequence=LSRLVLVGNLPNSTNP
SL2.30ch11_1140000_1870000_3	fimo	sequence_feature	1521464	1521511	2.02e-05	+	2	ID=HMM_SL2.30ch11_1140000_1870000_3_818;Name=HMM_SL2.30ch11_1140000_1870000_3_818;Score=2.02e-05;Sequence=LVFLQDIHDTLQGKKK
SL2.30ch11_1140000_1870000_3	fimo	sequence_feature	1751246	1751293	2.38e-05	+	2	ID=HMM_SL2.30ch11_1140000_1870000_3_819;Name=HMM_SL2.30ch11_1140000_1870000_3_819;Score=2.38e-05;Sequence=LAFLTSLSISLTFLIP
SL2.30ch11_1140000_1870000_3	fimo	sequence_feature	1858991	1859038	3.26e-05	+	2	ID=HMM_SL2.30ch11_1140000_1870000_3_820;Name=HMM_SL2.30ch11_1140000_1870000_3_820;Score=3.26e-05;Sequence=LILILLSFNSIEGTFQ
SL2.30ch11_1140000_1870000_3	fimo	sequence_feature	1143431	1143478	3.35e-05	+	2	ID=HMM_SL2.30ch11_1140000_1870000_3_821;Name=HMM_SL2.30ch11_1140000_1870000_3_821;Score=3.35e-05;Sequence=LNIFISIYNNVNGTIL
SL2.30ch11_1140000_1870000_3	fimo	sequence_feature	1420481	1420528	3.77e-05	+	2	ID=HMM_SL2.30ch11_1140000_1870000_3_822;Name=HMM_SL2.30ch11_1140000_1870000_3_822;Score=3.77e-05;Sequence=LIHLLRSFFSLNTQID
SL2.30ch11_1140000_1870000_3	fimo	sequence_feature	1162118	1162165	4.38e-05	+	2	ID=HMM_SL2.30ch11_1140000_1870000_3_823;Name=HMM_SL2.30ch11_1140000_1870000_3_823;Score=4.38e-05;Sequence=LTFSHQPFLQLIPSIP
SL2.30ch11_1140000_1870000_3	fimo	sequence_feature	1258787	1258834	4.38e-05	+	2	ID=HMM_SL2.30ch11_1140000_1870000_3_824;Name=HMM_SL2.30ch11_1140000_1870000_3_824;Score=4.38e-05;Sequence=LRDLFLLQLKLMFTPP
SL2.30ch11_1140000_1870000_3	fimo	sequence_feature	1266503	1266550	5.41e-05	+	2	ID=HMM_SL2.30ch11_1140000_1870000_3_825;Name=HMM_SL2.30ch11_1140000_1870000_3_825;Score=5.41e-05;Sequence=LLILSLSLSSLLSRPP
SL2.30ch11_1140000_1870000_3	fimo	sequence_feature	1702103	1702150	5.41e-05	+	2	ID=HMM_SL2.30ch11_1140000_1870000_3_826;Name=HMM_SL2.30ch11_1140000_1870000_3_826;Score=5.41e-05;Sequence=EHLLVLSKNEMSNNVP
SL2.30ch11_1140000_1870000_3	fimo	sequence_feature	1762016	1762063	5.75e-05	+	2	ID=HMM_SL2.30ch11_1140000_1870000_3_827;Name=HMM_SL2.30ch11_1140000_1870000_3_827;Score=5.75e-05;Sequence=LTILVLRCFHSHTDIF
SL2.30ch11_1140000_1870000_3	fimo	sequence_feature	1212749	1212796	6.3e-05	+	2	ID=HMM_SL2.30ch11_1140000_1870000_3_828;Name=HMM_SL2.30ch11_1140000_1870000_3_828;Score=6.3e-05;Sequence=LMVLQSSRNELNFEAE
SL2.30ch11_1140000_1870000_3	fimo	sequence_feature	1580078	1580125	7.32e-05	+	2	ID=HMM_SL2.30ch11_1140000_1870000_3_829;Name=HMM_SL2.30ch11_1140000_1870000_3_829;Score=7.32e-05;Sequence=LLKPHEFHVILSLDIP
SL2.30ch11_1140000_1870000_3	fimo	sequence_feature	1768451	1768498	9.27e-05	+	2	ID=HMM_SL2.30ch11_1140000_1870000_3_830;Name=HMM_SL2.30ch11_1140000_1870000_3_830;Score=9.27e-05;Sequence=LHKLNFLHFTLEPLIS
SL2.30ch11_1140000_1870000_3	fimo	sequence_feature	1314230	1314277	9.55e-05	+	2	ID=HMM_SL2.30ch11_1140000_1870000_3_831;Name=HMM_SL2.30ch11_1140000_1870000_3_831;Score=9.55e-05;Sequence=TTLLSLFSPTLLQHAP
SL2.30ch11_1140000_1870000_3	fimo	sequence_feature	1691066	1691113	9.55e-05	+	2	ID=HMM_SL2.30ch11_1140000_1870000_3_832;Name=HMM_SL2.30ch11_1140000_1870000_3_832;Score=9.55e-05;Sequence=LYALSAFRNHLSSSKF
SL2.30ch11_1140000_1870000_3	fimo	sequence_feature	1524341	1524388	9.82e-05	+	2	ID=HMM_SL2.30ch11_1140000_1870000_3_833;Name=HMM_SL2.30ch11_1140000_1870000_3_833;Score=9.82e-05;Sequence=LANLNLSTGSAEFNNF
SL2.30ch11_1140000_1870000_3	fimo	sequence_feature	1622099	1622146	9.82e-05	+	2	ID=HMM_SL2.30ch11_1140000_1870000_3_834;Name=HMM_SL2.30ch11_1140000_1870000_3_834;Score=9.82e-05;Sequence=LNNLNFIFPFLSGSFC
SL2.30ch11_1140000_1870000_4	fimo	sequence_feature	1767587	1767634	3.76e-06	-	0	ID=HMM_SL2.30ch11_1140000_1870000_4_835;Name=HMM_SL2.30ch11_1140000_1870000_4_835;Score=3.76e-06;Sequence=TNLLYLFYGQLTLTIL
SL2.30ch11_1140000_1870000_4	fimo	sequence_feature	1205849	1205896	1.26e-05	-	0	ID=HMM_SL2.30ch11_1140000_1870000_4_836;Name=HMM_SL2.30ch11_1140000_1870000_4_836;Score=1.26e-05;Sequence=LALLRKSFFNLRIGIP
SL2.30ch11_1140000_1870000_4	fimo	sequence_feature	1364129	1364176	1.37e-05	-	0	ID=HMM_SL2.30ch11_1140000_1870000_4_837;Name=HMM_SL2.30ch11_1140000_1870000_4_837;Score=1.37e-05;Sequence=LVLYSLSTYSLRETIG
SL2.30ch11_1140000_1870000_4	fimo	sequence_feature	1284683	1284730	1.62e-05	-	0	ID=HMM_SL2.30ch11_1140000_1870000_4_838;Name=HMM_SL2.30ch11_1140000_1870000_4_838;Score=1.62e-05;Sequence=LEFLHLNEKRLNFNLT
SL2.30ch11_1140000_1870000_4	fimo	sequence_feature	1172429	1172476	1.62e-05	-	0	ID=HMM_SL2.30ch11_1140000_1870000_4_839;Name=HMM_SL2.30ch11_1140000_1870000_4_839;Score=1.62e-05;Sequence=LILKVLIWNKLHSKED
SL2.30ch11_1140000_1870000_4	fimo	sequence_feature	1200284	1200331	1.67e-05	-	0	ID=HMM_SL2.30ch11_1140000_1870000_4_840;Name=HMM_SL2.30ch11_1140000_1870000_4_840;Score=1.67e-05;Sequence=LHLLLSAGNTLSKSIN
SL2.30ch11_1140000_1870000_4	fimo	sequence_feature	1411274	1411321	2.26e-05	-	0	ID=HMM_SL2.30ch11_1140000_1870000_4_841;Name=HMM_SL2.30ch11_1140000_1870000_4_841;Score=2.26e-05;Sequence=LSFFNISTLFLKKRIP
SL2.30ch11_1140000_1870000_4	fimo	sequence_feature	1303631	1303678	3.35e-05	-	0	ID=HMM_SL2.30ch11_1140000_1870000_4_842;Name=HMM_SL2.30ch11_1140000_1870000_4_842;Score=3.35e-05;Sequence=GLVLNKSWANLGGPDR
SL2.30ch11_1140000_1870000_4	fimo	sequence_feature	1508699	1508746	3.56e-05	-	0	ID=HMM_SL2.30ch11_1140000_1870000_4_843;Name=HMM_SL2.30ch11_1140000_1870000_4_843;Score=3.56e-05;Sequence=NTYINLINNNSSQKIV
SL2.30ch11_1140000_1870000_4	fimo	sequence_feature	1464416	1464463	5.41e-05	-	0	ID=HMM_SL2.30ch11_1140000_1870000_4_844;Name=HMM_SL2.30ch11_1140000_1870000_4_844;Score=5.41e-05;Sequence=LAVCILSFNEFICLYP
SL2.30ch11_1140000_1870000_4	fimo	sequence_feature	1524164	1524211	5.93e-05	-	0	ID=HMM_SL2.30ch11_1140000_1870000_4_845;Name=HMM_SL2.30ch11_1140000_1870000_4_845;Score=5.93e-05;Sequence=IITLHLSFFLLYRHIT
SL2.30ch11_1140000_1870000_4	fimo	sequence_feature	1497533	1497580	6.89e-05	-	0	ID=HMM_SL2.30ch11_1140000_1870000_4_846;Name=HMM_SL2.30ch11_1140000_1870000_4_846;Score=6.89e-05;Sequence=HLNLVSSGNQTPQPIP
SL2.30ch11_1140000_1870000_4	fimo	sequence_feature	1239917	1239964	6.89e-05	-	0	ID=HMM_SL2.30ch11_1140000_1870000_4_847;Name=HMM_SL2.30ch11_1140000_1870000_4_847;Score=6.89e-05;Sequence=LTYLRLNNLKLKLIIF
SL2.30ch11_1140000_1870000_4	fimo	sequence_feature	1338239	1338286	8.75e-05	-	0	ID=HMM_SL2.30ch11_1140000_1870000_4_848;Name=HMM_SL2.30ch11_1140000_1870000_4_848;Score=8.75e-05;Sequence=LRVLENNSLSAKGRIR
SL2.30ch11_1140000_1870000_5	fimo	sequence_feature	1721666	1721713	6.87e-07	-	1	ID=HMM_SL2.30ch11_1140000_1870000_5_849;Name=HMM_SL2.30ch11_1140000_1870000_5_849;Score=6.87e-07;Sequence=LFLLDLSFEHLIKQIV
SL2.30ch11_1140000_1870000_5	fimo	sequence_feature	1597268	1597315	1.16e-05	-	1	ID=HMM_SL2.30ch11_1140000_1870000_5_850;Name=HMM_SL2.30ch11_1140000_1870000_5_850;Score=1.16e-05;Sequence=STNLCLISNNLGRLIN
SL2.30ch11_1140000_1870000_5	fimo	sequence_feature	1570178	1570225	1.81e-05	-	1	ID=HMM_SL2.30ch11_1140000_1870000_5_851;Name=HMM_SL2.30ch11_1140000_1870000_5_851;Score=1.81e-05;Sequence=LVGLNLIIKLLSFAIG
SL2.30ch11_1140000_1870000_5	fimo	sequence_feature	1211963	1212010	2.38e-05	-	1	ID=HMM_SL2.30ch11_1140000_1870000_5_852;Name=HMM_SL2.30ch11_1140000_1870000_5_852;Score=2.38e-05;Sequence=LHTLYPSEALLVGLLW
SL2.30ch11_1140000_1870000_5	fimo	sequence_feature	1674167	1674214	3.66e-05	-	1	ID=HMM_SL2.30ch11_1140000_1870000_5_853;Name=HMM_SL2.30ch11_1140000_1870000_5_853;Score=3.66e-05;Sequence=LTVLHLSSRNSLMAIA
SL2.30ch11_1140000_1870000_5	fimo	sequence_feature	1801328	1801375	4.25e-05	-	1	ID=HMM_SL2.30ch11_1140000_1870000_5_854;Name=HMM_SL2.30ch11_1140000_1870000_5_854;Score=4.25e-05;Sequence=LLNLNLLLNSLTPLSS
SL2.30ch11_1140000_1870000_5	fimo	sequence_feature	1499741	1499788	5.25e-05	-	1	ID=HMM_SL2.30ch11_1140000_1870000_5_855;Name=HMM_SL2.30ch11_1140000_1870000_5_855;Score=5.25e-05;Sequence=GNPLNLIFRKGKGHIL
SL2.30ch11_1140000_1870000_5	fimo	sequence_feature	1356002	1356049	5.25e-05	-	1	ID=HMM_SL2.30ch11_1140000_1870000_5_856;Name=HMM_SL2.30ch11_1140000_1870000_5_856;Score=5.25e-05;Sequence=LLQLNLSSQVQTTHVC
SL2.30ch11_1140000_1870000_5	fimo	sequence_feature	1150649	1150696	5.25e-05	-	1	ID=HMM_SL2.30ch11_1140000_1870000_5_857;Name=HMM_SL2.30ch11_1140000_1870000_5_857;Score=5.25e-05;Sequence=LETLFLSCNKRNILSS
SL2.30ch11_1140000_1870000_5	fimo	sequence_feature	1829216	1829263	6.49e-05	-	1	ID=HMM_SL2.30ch11_1140000_1870000_5_858;Name=HMM_SL2.30ch11_1140000_1870000_5_858;Score=6.49e-05;Sequence=LNLKNLIFNRLPTSLG
SL2.30ch11_1140000_1870000_5	fimo	sequence_feature	1471424	1471471	9.27e-05	-	1	ID=HMM_SL2.30ch11_1140000_1870000_5_859;Name=HMM_SL2.30ch11_1140000_1870000_5_859;Score=9.27e-05;Sequence=SNFLVVFSNSHQSKIQ
SL2.30ch11_1140000_1870000_5	fimo	sequence_feature	1558343	1558390	9.55e-05	-	1	ID=HMM_SL2.30ch11_1140000_1870000_5_860;Name=HMM_SL2.30ch11_1140000_1870000_5_860;Score=9.55e-05;Sequence=LNILQLLFLQFKIPLP
SL2.30ch11_1140000_1870000_6	fimo	sequence_feature	1596740	1596787	3.16e-05	-	2	ID=HMM_SL2.30ch11_1140000_1870000_6_861;Name=HMM_SL2.30ch11_1140000_1870000_6_861;Score=3.16e-05;Sequence=LLVTSLFHCELSGSRL
SL2.30ch11_1140000_1870000_6	fimo	sequence_feature	1204700	1204747	3.35e-05	-	2	ID=HMM_SL2.30ch11_1140000_1870000_6_862;Name=HMM_SL2.30ch11_1140000_1870000_6_862;Score=3.35e-05;Sequence=LIQLTFSMVKLNSQIP
SL2.30ch11_1140000_1870000_6	fimo	sequence_feature	1542938	1542985	4.38e-05	-	2	ID=HMM_SL2.30ch11_1140000_1870000_6_863;Name=HMM_SL2.30ch11_1140000_1870000_6_863;Score=4.38e-05;Sequence=LEQVQLSYLSREHPIL
SL2.30ch11_1140000_1870000_6	fimo	sequence_feature	1636898	1636945	4.79e-05	-	2	ID=HMM_SL2.30ch11_1140000_1870000_6_864;Name=HMM_SL2.30ch11_1140000_1870000_6_864;Score=4.79e-05;Sequence=LRNLKASSYRLELTHP
SL2.30ch11_1140000_1870000_6	fimo	sequence_feature	1551038	1551085	5.25e-05	-	2	ID=HMM_SL2.30ch11_1140000_1870000_6_865;Name=HMM_SL2.30ch11_1140000_1870000_6_865;Score=5.25e-05;Sequence=LNYLLRITNPLTMNHP
SL2.30ch11_1140000_1870000_6	fimo	sequence_feature	1356647	1356694	5.75e-05	-	2	ID=HMM_SL2.30ch11_1140000_1870000_6_866;Name=HMM_SL2.30ch11_1140000_1870000_6_866;Score=5.75e-05;Sequence=LLKFNLNQNHVFFSSP
SL2.30ch11_1140000_1870000_6	fimo	sequence_feature	1255913	1255960	5.75e-05	-	2	ID=HMM_SL2.30ch11_1140000_1870000_6_867;Name=HMM_SL2.30ch11_1140000_1870000_6_867;Score=5.75e-05;Sequence=LLLGDLSSLRTKKMII
SL2.30ch11_1140000_1870000_6	fimo	sequence_feature	1413302	1413349	6.49e-05	-	2	ID=HMM_SL2.30ch11_1140000_1870000_6_868;Name=HMM_SL2.30ch11_1140000_1870000_6_868;Score=6.49e-05;Sequence=LSILNTFSNSNNLHEK
SL2.30ch11_1140000_1870000_6	fimo	sequence_feature	1471460	1471507	7.11e-05	-	2	ID=HMM_SL2.30ch11_1140000_1870000_6_869;Name=HMM_SL2.30ch11_1140000_1870000_6_869;Score=7.11e-05;Sequence=LAILNIISSFLVLKFP
SL2.30ch11_1140000_1870000_6	fimo	sequence_feature	1237550	1237597	7.32e-05	-	2	ID=HMM_SL2.30ch11_1140000_1870000_6_870;Name=HMM_SL2.30ch11_1140000_1870000_6_870;Score=7.32e-05;Sequence=TTFLILFSITLKLKID
SL2.30ch11_1140000_1870000_6	fimo	sequence_feature	1796399	1796446	7.54e-05	-	2	ID=HMM_SL2.30ch11_1140000_1870000_6_871;Name=HMM_SL2.30ch11_1140000_1870000_6_871;Score=7.54e-05;Sequence=LSVLLLLFNNLGILHH
SL2.30ch11_1140000_1870000_6	fimo	sequence_feature	1202927	1202974	7.77e-05	-	2	ID=HMM_SL2.30ch11_1140000_1870000_6_872;Name=HMM_SL2.30ch11_1140000_1870000_6_872;Score=7.77e-05;Sequence=VVTLHFFYNRRTSKII
SL2.30ch11_1140000_1870000_6	fimo	sequence_feature	1804346	1804393	9.82e-05	-	2	ID=HMM_SL2.30ch11_1140000_1870000_6_873;Name=HMM_SL2.30ch11_1140000_1870000_6_873;Score=9.82e-05;Sequence=LEPLINFHGNFNVHIP
SL2.30ch12_2120000_3020000_1	fimo	sequence_feature	2943185	2943232	8.77e-19	+	0	ID=HMM_SL2.30ch12_2120000_3020000_1_874;Name=HMM_SL2.30ch12_2120000_3020000_1_874;Score=8.77e-19;Sequence=LWQLNLSHNNLTGHIP
SL2.30ch12_2120000_3020000_1	fimo	sequence_feature	2990057	2990104	8.77e-19	+	0	ID=HMM_SL2.30ch12_2120000_3020000_1_875;Name=HMM_SL2.30ch12_2120000_3020000_1_875;Score=8.77e-19;Sequence=LWLLNLSHNNLIGHIP
SL2.30ch12_2120000_3020000_1	fimo	sequence_feature	2961620	2961667	4.16e-15	+	0	ID=HMM_SL2.30ch12_2120000_3020000_1_876;Name=HMM_SL2.30ch12_2120000_3020000_1_876;Score=4.16e-15;Sequence=LNYLDLSYNSLNGTIP
SL2.30ch12_2120000_3020000_1	fimo	sequence_feature	2975402	2975449	4.16e-15	+	0	ID=HMM_SL2.30ch12_2120000_3020000_1_877;Name=HMM_SL2.30ch12_2120000_3020000_1_877;Score=4.16e-15;Sequence=LNYLDLSYNSLNGTIP
SL2.30ch12_2120000_3020000_1	fimo	sequence_feature	2990129	2990176	4.73e-15	+	0	ID=HMM_SL2.30ch12_2120000_3020000_1_878;Name=HMM_SL2.30ch12_2120000_3020000_1_878;Score=4.73e-15;Sequence=LEALDLSWNRLTGKIP
SL2.30ch12_2120000_3020000_1	fimo	sequence_feature	2990201	2990248	4.73e-15	+	0	ID=HMM_SL2.30ch12_2120000_3020000_1_879;Name=HMM_SL2.30ch12_2120000_3020000_1_879;Score=4.73e-15;Sequence=LAILNLSQNHLMGPIP
SL2.30ch12_2120000_3020000_1	fimo	sequence_feature	2989262	2989309	1.93e-12	+	0	ID=HMM_SL2.30ch12_2120000_3020000_1_880;Name=HMM_SL2.30ch12_2120000_3020000_1_880;Score=1.93e-12;Sequence=LQFLNLSHNSLTGHLP
SL2.30ch12_2120000_3020000_1	fimo	sequence_feature	2962055	2962102	5.09e-12	+	0	ID=HMM_SL2.30ch12_2120000_3020000_1_881;Name=HMM_SL2.30ch12_2120000_3020000_1_881;Score=5.09e-12;Sequence=LQFLNLSHNSLTGNLP
SL2.30ch12_2120000_3020000_1	fimo	sequence_feature	2975837	2975884	5.09e-12	+	0	ID=HMM_SL2.30ch12_2120000_3020000_1_882;Name=HMM_SL2.30ch12_2120000_3020000_1_882;Score=5.09e-12;Sequence=LQFLNLSHNSLTGNLP
SL2.30ch12_2120000_3020000_1	fimo	sequence_feature	2988830	2988877	4.31e-10	+	0	ID=HMM_SL2.30ch12_2120000_3020000_1_883;Name=HMM_SL2.30ch12_2120000_3020000_1_883;Score=4.31e-10;Sequence=LVSVDLSFNSLNGTIP
SL2.30ch12_2120000_3020000_1	fimo	sequence_feature	2942549	2942596	9.27e-10	+	0	ID=HMM_SL2.30ch12_2120000_3020000_1_884;Name=HMM_SL2.30ch12_2120000_3020000_1_884;Score=9.27e-10;Sequence=LTVLDLRRNNFTGSIP
SL2.30ch12_2120000_3020000_1	fimo	sequence_feature	2989328	2989375	1.06e-09	+	0	ID=HMM_SL2.30ch12_2120000_3020000_1_885;Name=HMM_SL2.30ch12_2120000_3020000_1_885;Score=1.06e-09;Sequence=LEYLDLKFNSLQGPLP
SL2.30ch12_2120000_3020000_1	fimo	sequence_feature	2989472	2989519	1.15e-09	+	0	ID=HMM_SL2.30ch12_2120000_3020000_1_886;Name=HMM_SL2.30ch12_2120000_3020000_1_886;Score=1.15e-09;Sequence=LAALDLRRNNLTGNLP
SL2.30ch12_2120000_3020000_1	fimo	sequence_feature	2962121	2962168	1.91e-09	+	0	ID=HMM_SL2.30ch12_2120000_3020000_1_887;Name=HMM_SL2.30ch12_2120000_3020000_1_887;Score=1.91e-09;Sequence=LQYLDLKFNSLQGPLP
SL2.30ch12_2120000_3020000_1	fimo	sequence_feature	2975903	2975950	1.91e-09	+	0	ID=HMM_SL2.30ch12_2120000_3020000_1_888;Name=HMM_SL2.30ch12_2120000_3020000_1_888;Score=1.91e-09;Sequence=LQYLDLKFNSLQGPLP
SL2.30ch12_2120000_3020000_1	fimo	sequence_feature	2961764	2961811	2e-09	+	0	ID=HMM_SL2.30ch12_2120000_3020000_1_889;Name=HMM_SL2.30ch12_2120000_3020000_1_889;Score=2e-09;Sequence=LERLDLSHNQLSGSFA
SL2.30ch12_2120000_3020000_1	fimo	sequence_feature	2975546	2975593	2e-09	+	0	ID=HMM_SL2.30ch12_2120000_3020000_1_890;Name=HMM_SL2.30ch12_2120000_3020000_1_890;Score=2e-09;Sequence=LERLDLSHNQLSGSFA
SL2.30ch12_2120000_3020000_1	fimo	sequence_feature	2962193	2962240	2.3e-09	+	0	ID=HMM_SL2.30ch12_2120000_3020000_1_891;Name=HMM_SL2.30ch12_2120000_3020000_1_891;Score=2.3e-09;Sequence=LILLDLSRNNISNSIP
SL2.30ch12_2120000_3020000_1	fimo	sequence_feature	2975975	2976022	2.3e-09	+	0	ID=HMM_SL2.30ch12_2120000_3020000_1_892;Name=HMM_SL2.30ch12_2120000_3020000_1_892;Score=2.3e-09;Sequence=LILLDLSRNNISNSIP
SL2.30ch12_2120000_3020000_1	fimo	sequence_feature	2988614	2988661	2.41e-09	+	0	ID=HMM_SL2.30ch12_2120000_3020000_1_893;Name=HMM_SL2.30ch12_2120000_3020000_1_893;Score=2.41e-09;Sequence=ITKLYLSNNHFTGNIP
SL2.30ch12_2120000_3020000_1	fimo	sequence_feature	2988974	2989021	3.85e-09	+	0	ID=HMM_SL2.30ch12_2120000_3020000_1_894;Name=HMM_SL2.30ch12_2120000_3020000_1_894;Score=3.85e-09;Sequence=LYELHLSNNQLSGSFP
SL2.30ch12_2120000_3020000_1	fimo	sequence_feature	2961404	2961451	4.22e-09	+	0	ID=HMM_SL2.30ch12_2120000_3020000_1_895;Name=HMM_SL2.30ch12_2120000_3020000_1_895;Score=4.22e-09;Sequence=LTGLHLSSNSFSGEIT
SL2.30ch12_2120000_3020000_1	fimo	sequence_feature	2975186	2975233	4.22e-09	+	0	ID=HMM_SL2.30ch12_2120000_3020000_1_896;Name=HMM_SL2.30ch12_2120000_3020000_1_896;Score=4.22e-09;Sequence=LTGLHLSSNSFSGEIT
SL2.30ch12_2120000_3020000_1	fimo	sequence_feature	2961977	2962024	5.06e-09	+	0	ID=HMM_SL2.30ch12_2120000_3020000_1_897;Name=HMM_SL2.30ch12_2120000_3020000_1_897;Score=5.06e-09;Sequence=LVYLDISNNKISGQIP
SL2.30ch12_2120000_3020000_1	fimo	sequence_feature	2975759	2975806	5.06e-09	+	0	ID=HMM_SL2.30ch12_2120000_3020000_1_898;Name=HMM_SL2.30ch12_2120000_3020000_1_898;Score=5.06e-09;Sequence=LVYLDISNNKISGQIP
SL2.30ch12_2120000_3020000_1	fimo	sequence_feature	2942477	2942524	9.17e-09	+	0	ID=HMM_SL2.30ch12_2120000_3020000_1_899;Name=HMM_SL2.30ch12_2120000_3020000_1_899;Score=9.17e-09;Sequence=LKFLDLSHNNFSNSIP
SL2.30ch12_2120000_3020000_1	fimo	sequence_feature	2961332	2961379	1.16e-08	+	0	ID=HMM_SL2.30ch12_2120000_3020000_1_900;Name=HMM_SL2.30ch12_2120000_3020000_1_900;Score=1.16e-08;Sequence=ITELDFSHNNFTGHIP
SL2.30ch12_2120000_3020000_1	fimo	sequence_feature	2975114	2975161	1.16e-08	+	0	ID=HMM_SL2.30ch12_2120000_3020000_1_901;Name=HMM_SL2.30ch12_2120000_3020000_1_901;Score=1.16e-08;Sequence=ITELDFSHNNFTGHIP
SL2.30ch12_2120000_3020000_1	fimo	sequence_feature	2961476	2961523	1.51e-08	+	0	ID=HMM_SL2.30ch12_2120000_3020000_1_902;Name=HMM_SL2.30ch12_2120000_3020000_1_902;Score=1.51e-08;Sequence=LRYLYLFRNSFIGLFP
SL2.30ch12_2120000_3020000_1	fimo	sequence_feature	2975258	2975305	1.51e-08	+	0	ID=HMM_SL2.30ch12_2120000_3020000_1_903;Name=HMM_SL2.30ch12_2120000_3020000_1_903;Score=1.51e-08;Sequence=LRYLYLFRNSFIGLFP
SL2.30ch12_2120000_3020000_1	fimo	sequence_feature	2960816	2960863	2.46e-08	+	0	ID=HMM_SL2.30ch12_2120000_3020000_1_904;Name=HMM_SL2.30ch12_2120000_3020000_1_904;Score=2.46e-08;Sequence=LRHLNLSDAWFQGKIP
SL2.30ch12_2120000_3020000_1	fimo	sequence_feature	2974598	2974645	2.46e-08	+	0	ID=HMM_SL2.30ch12_2120000_3020000_1_905;Name=HMM_SL2.30ch12_2120000_3020000_1_905;Score=2.46e-08;Sequence=LRHLNLSDAWFQGKIP
SL2.30ch12_2120000_3020000_1	fimo	sequence_feature	2987489	2987536	2.46e-08	+	0	ID=HMM_SL2.30ch12_2120000_3020000_1_906;Name=HMM_SL2.30ch12_2120000_3020000_1_906;Score=2.46e-08;Sequence=LRHLNLSDAWFQGKIP
SL2.30ch12_2120000_3020000_1	fimo	sequence_feature	2942405	2942452	3.23e-08	+	0	ID=HMM_SL2.30ch12_2120000_3020000_1_907;Name=HMM_SL2.30ch12_2120000_3020000_1_907;Score=3.23e-08;Sequence=LHYLDLKFNFLQGPLP
SL2.30ch12_2120000_3020000_1	fimo	sequence_feature	2988758	2988805	3.47e-08	+	0	ID=HMM_SL2.30ch12_2120000_3020000_1_908;Name=HMM_SL2.30ch12_2120000_3020000_1_908;Score=3.47e-08;Sequence=LKYLYMSNNSLSGPLP
SL2.30ch12_2120000_3020000_1	fimo	sequence_feature	2961548	2961595	5.35e-08	+	0	ID=HMM_SL2.30ch12_2120000_3020000_1_909;Name=HMM_SL2.30ch12_2120000_3020000_1_909;Score=5.35e-08;Sequence=LERLDMSSNSLSSPLP
SL2.30ch12_2120000_3020000_1	fimo	sequence_feature	2975330	2975377	5.35e-08	+	0	ID=HMM_SL2.30ch12_2120000_3020000_1_910;Name=HMM_SL2.30ch12_2120000_3020000_1_910;Score=5.35e-08;Sequence=LERLDMSSNSLSSPLP
SL2.30ch12_2120000_3020000_1	fimo	sequence_feature	2989184	2989231	6.47e-08	+	0	ID=HMM_SL2.30ch12_2120000_3020000_1_911;Name=HMM_SL2.30ch12_2120000_3020000_1_911;Score=6.47e-08;Sequence=LVYLDISNNKICGEIP
SL2.30ch12_2120000_3020000_1	fimo	sequence_feature	2961260	2961307	6.99e-08	+	0	ID=HMM_SL2.30ch12_2120000_3020000_1_912;Name=HMM_SL2.30ch12_2120000_3020000_1_912;Score=6.99e-08;Sequence=LNILNLQRCHFSGSIP
SL2.30ch12_2120000_3020000_1	fimo	sequence_feature	2975042	2975089	6.99e-08	+	0	ID=HMM_SL2.30ch12_2120000_3020000_1_913;Name=HMM_SL2.30ch12_2120000_3020000_1_913;Score=6.99e-08;Sequence=LNILNLQRCHFSGSIP
SL2.30ch12_2120000_3020000_1	fimo	sequence_feature	2960972	2961019	1.27e-07	+	0	ID=HMM_SL2.30ch12_2120000_3020000_1_914;Name=HMM_SL2.30ch12_2120000_3020000_1_914;Score=1.27e-07;Sequence=LELLSLSEVNISSPIP
SL2.30ch12_2120000_3020000_1	fimo	sequence_feature	2974754	2974801	1.27e-07	+	0	ID=HMM_SL2.30ch12_2120000_3020000_1_915;Name=HMM_SL2.30ch12_2120000_3020000_1_915;Score=1.27e-07;Sequence=LELLSLSEVNISSPIP
SL2.30ch12_2120000_3020000_1	fimo	sequence_feature	2988254	2988301	1.97e-07	+	0	ID=HMM_SL2.30ch12_2120000_3020000_1_916;Name=HMM_SL2.30ch12_2120000_3020000_1_916;Score=1.97e-07;Sequence=LELLSLSDVDISSPIP
SL2.30ch12_2120000_3020000_1	fimo	sequence_feature	2988542	2988589	1.97e-07	+	0	ID=HMM_SL2.30ch12_2120000_3020000_1_917;Name=HMM_SL2.30ch12_2120000_3020000_1_917;Score=1.97e-07;Sequence=LNILNLYGCQFSGSIP
SL2.30ch12_2120000_3020000_1	fimo	sequence_feature	2989766	2989813	2.77e-07	+	0	ID=HMM_SL2.30ch12_2120000_3020000_1_918;Name=HMM_SL2.30ch12_2120000_3020000_1_918;Score=2.77e-07;Sequence=LRIFDLSRNDFSGSLP
SL2.30ch12_2120000_3020000_1	fimo	sequence_feature	2943113	2943160	3.82e-07	+	0	ID=HMM_SL2.30ch12_2120000_3020000_1_919;Name=HMM_SL2.30ch12_2120000_3020000_1_919;Score=3.82e-07;Sequence=MTTIDLSSNHFEGVIP
SL2.30ch12_2120000_3020000_1	fimo	sequence_feature	2989985	2990032	3.82e-07	+	0	ID=HMM_SL2.30ch12_2120000_3020000_1_920;Name=HMM_SL2.30ch12_2120000_3020000_1_920;Score=3.82e-07;Sequence=TTTIDLSSNHFEGVIP
SL2.30ch12_2120000_3020000_1	fimo	sequence_feature	2962265	2962312	6.07e-07	+	0	ID=HMM_SL2.30ch12_2120000_3020000_1_921;Name=HMM_SL2.30ch12_2120000_3020000_1_921;Score=6.07e-07;Sequence=LTVLDLRKNNFTGSLP
SL2.30ch12_2120000_3020000_1	fimo	sequence_feature	2976047	2976094	6.07e-07	+	0	ID=HMM_SL2.30ch12_2120000_3020000_1_922;Name=HMM_SL2.30ch12_2120000_3020000_1_922;Score=6.07e-07;Sequence=LTVLDLRKNNFTGSLP
SL2.30ch12_2120000_3020000_1	fimo	sequence_feature	2942621	2942668	6.26e-07	+	0	ID=HMM_SL2.30ch12_2120000_3020000_1_923;Name=HMM_SL2.30ch12_2120000_3020000_1_923;Score=6.26e-07;Sequence=LRTIVLNGNQFEGPVP
SL2.30ch12_2120000_3020000_1	fimo	sequence_feature	2963570	2963617	7.54e-07	+	0	ID=HMM_SL2.30ch12_2120000_3020000_1_924;Name=HMM_SL2.30ch12_2120000_3020000_1_924;Score=7.54e-07;Sequence=ILSLNMSSNSLSGPLP
SL2.30ch12_2120000_3020000_1	fimo	sequence_feature	2977352	2977399	7.54e-07	+	0	ID=HMM_SL2.30ch12_2120000_3020000_1_925;Name=HMM_SL2.30ch12_2120000_3020000_1_925;Score=7.54e-07;Sequence=ILSLNMSSNSLSGPLP
SL2.30ch12_2120000_3020000_1	fimo	sequence_feature	2989400	2989447	1.03e-06	+	0	ID=HMM_SL2.30ch12_2120000_3020000_1_926;Name=HMM_SL2.30ch12_2120000_3020000_1_926;Score=1.03e-06;Sequence=LILLDLSHNYFSDSVP
SL2.30ch12_2120000_3020000_1	fimo	sequence_feature	2961836	2961883	1.09e-06	+	0	ID=HMM_SL2.30ch12_2120000_3020000_1_927;Name=HMM_SL2.30ch12_2120000_3020000_1_927;Score=1.09e-06;Sequence=LYYLDLSSNKITNDIT
SL2.30ch12_2120000_3020000_1	fimo	sequence_feature	2975618	2975665	1.09e-06	+	0	ID=HMM_SL2.30ch12_2120000_3020000_1_928;Name=HMM_SL2.30ch12_2120000_3020000_1_928;Score=1.09e-06;Sequence=LYYLDLSSNKITNDIT
SL2.30ch12_2120000_3020000_1	fimo	sequence_feature	2989688	2989735	2.85e-06	+	0	ID=HMM_SL2.30ch12_2120000_3020000_1_929;Name=HMM_SL2.30ch12_2120000_3020000_1_929;Score=2.85e-06;Sequence=LQVLILKSNKFHGPIS
SL2.30ch12_2120000_3020000_1	fimo	sequence_feature	2960741	2960788	3.51e-06	+	0	ID=HMM_SL2.30ch12_2120000_3020000_1_930;Name=HMM_SL2.30ch12_2120000_3020000_1_930;Score=3.51e-06;Sequence=LHTLNLAYNHFNYSSI
SL2.30ch12_2120000_3020000_1	fimo	sequence_feature	2974523	2974570	3.51e-06	+	0	ID=HMM_SL2.30ch12_2120000_3020000_1_931;Name=HMM_SL2.30ch12_2120000_3020000_1_931;Score=3.51e-06;Sequence=LHTLNLAYNHFNYSSI
SL2.30ch12_2120000_3020000_1	fimo	sequence_feature	2942843	2942890	6.26e-06	+	0	ID=HMM_SL2.30ch12_2120000_3020000_1_932;Name=HMM_SL2.30ch12_2120000_3020000_1_932;Score=6.26e-06;Sequence=LRIFDVSRNEFSGSLP
SL2.30ch12_2120000_3020000_1	fimo	sequence_feature	2988686	2988733	7.84e-06	+	0	ID=HMM_SL2.30ch12_2120000_3020000_1_933;Name=HMM_SL2.30ch12_2120000_3020000_1_933;Score=7.84e-06;Sequence=LYYLELSKNSFIGLFP
SL2.30ch12_2120000_3020000_1	fimo	sequence_feature	2963516	2963563	1.16e-05	+	0	ID=HMM_SL2.30ch12_2120000_3020000_1_934;Name=HMM_SL2.30ch12_2120000_3020000_1_934;Score=1.16e-05;Sequence=VCYLDLSNNSFIGPFS
SL2.30ch12_2120000_3020000_1	fimo	sequence_feature	2977298	2977345	1.16e-05	+	0	ID=HMM_SL2.30ch12_2120000_3020000_1_935;Name=HMM_SL2.30ch12_2120000_3020000_1_935;Score=1.16e-05;Sequence=VCYLDLSNNSFIGPFS
SL2.30ch12_2120000_3020000_1	fimo	sequence_feature	2962337	2962384	1.67e-05	+	0	ID=HMM_SL2.30ch12_2120000_3020000_1_936;Name=HMM_SL2.30ch12_2120000_3020000_1_936;Score=1.67e-05;Sequence=LSTIVINGNRFEGPVP
SL2.30ch12_2120000_3020000_1	fimo	sequence_feature	2976119	2976166	1.67e-05	+	0	ID=HMM_SL2.30ch12_2120000_3020000_1_937;Name=HMM_SL2.30ch12_2120000_3020000_1_937;Score=1.67e-05;Sequence=LSTIVINGNRFEGPVP
SL2.30ch12_2120000_3020000_1	fimo	sequence_feature	2989544	2989591	1.67e-05	+	0	ID=HMM_SL2.30ch12_2120000_3020000_1_938;Name=HMM_SL2.30ch12_2120000_3020000_1_938;Score=1.67e-05;Sequence=LSTIVVNGNRFEGPVP
SL2.30ch12_2120000_3020000_1	fimo	sequence_feature	2521094	2521141	1.91e-05	+	0	ID=HMM_SL2.30ch12_2120000_3020000_1_939;Name=HMM_SL2.30ch12_2120000_3020000_1_939;Score=1.91e-05;Sequence=IEIHHSSNNSLLLMIP
SL2.30ch12_2120000_3020000_1	fimo	sequence_feature	2988320	2988367	2.08e-05	+	0	ID=HMM_SL2.30ch12_2120000_3020000_1_940;Name=HMM_SL2.30ch12_2120000_3020000_1_940;Score=2.08e-05;Sequence=LRHLDLDNTNLRGVLT
SL2.30ch12_2120000_3020000_1	fimo	sequence_feature	2900207	2900254	2.19e-05	+	0	ID=HMM_SL2.30ch12_2120000_3020000_1_941;Name=HMM_SL2.30ch12_2120000_3020000_1_941;Score=2.19e-05;Sequence=LQKLSLSFLLLHIPLE
SL2.30ch12_2120000_3020000_1	fimo	sequence_feature	2961038	2961085	2.32e-05	+	0	ID=HMM_SL2.30ch12_2120000_3020000_1_942;Name=HMM_SL2.30ch12_2120000_3020000_1_942;Score=2.32e-05;Sequence=LRYLDLDNTNLRGVLT
SL2.30ch12_2120000_3020000_1	fimo	sequence_feature	2974820	2974867	2.32e-05	+	0	ID=HMM_SL2.30ch12_2120000_3020000_1_943;Name=HMM_SL2.30ch12_2120000_3020000_1_943;Score=2.32e-05;Sequence=LRYLDLDNTNLRGVLT
SL2.30ch12_2120000_3020000_1	fimo	sequence_feature	2125724	2125771	2.9e-05	+	0	ID=HMM_SL2.30ch12_2120000_3020000_1_944;Name=HMM_SL2.30ch12_2120000_3020000_1_944;Score=2.9e-05;Sequence=LQTLYLGYVVVVALIV
SL2.30ch12_2120000_3020000_1	fimo	sequence_feature	2716541	2716588	3.45e-05	+	0	ID=HMM_SL2.30ch12_2120000_3020000_1_945;Name=HMM_SL2.30ch12_2120000_3020000_1_945;Score=3.45e-05;Sequence=CNILYLVSNFLIDTLP
SL2.30ch12_2120000_3020000_1	fimo	sequence_feature	2989616	2989663	3.45e-05	+	0	ID=HMM_SL2.30ch12_2120000_3020000_1_946;Name=HMM_SL2.30ch12_2120000_3020000_1_946;Score=3.45e-05;Sequence=LEVLDVGNNAINDTFP
SL2.30ch12_2120000_3020000_1	fimo	sequence_feature	2594879	2594926	4.25e-05	+	0	ID=HMM_SL2.30ch12_2120000_3020000_1_947;Name=HMM_SL2.30ch12_2120000_3020000_1_947;Score=4.25e-05;Sequence=RVLLDLSGFPLVGPSS
SL2.30ch12_2120000_3020000_1	fimo	sequence_feature	2645186	2645233	4.38e-05	+	0	ID=HMM_SL2.30ch12_2120000_3020000_1_948;Name=HMM_SL2.30ch12_2120000_3020000_1_948;Score=4.38e-05;Sequence=LSYLLVFSLNSSGKIH
SL2.30ch12_2120000_3020000_1	fimo	sequence_feature	2844161	2844208	4.51e-05	+	0	ID=HMM_SL2.30ch12_2120000_3020000_1_949;Name=HMM_SL2.30ch12_2120000_3020000_1_949;Score=4.51e-05;Sequence=LNFLVLDYLTSSITIM
SL2.30ch12_2120000_3020000_1	fimo	sequence_feature	2966864	2966911	4.51e-05	+	0	ID=HMM_SL2.30ch12_2120000_3020000_1_950;Name=HMM_SL2.30ch12_2120000_3020000_1_950;Score=4.51e-05;Sequence=LSTLVLSRGMTMGMLL
SL2.30ch12_2120000_3020000_1	fimo	sequence_feature	2980646	2980693	4.51e-05	+	0	ID=HMM_SL2.30ch12_2120000_3020000_1_951;Name=HMM_SL2.30ch12_2120000_3020000_1_951;Score=4.51e-05;Sequence=LSTLVLSRGMTMGMLL
SL2.30ch12_2120000_3020000_1	fimo	sequence_feature	2630030	2630077	4.65e-05	+	0	ID=HMM_SL2.30ch12_2120000_3020000_1_952;Name=HMM_SL2.30ch12_2120000_3020000_1_952;Score=4.65e-05;Sequence=LLFLLLFYSHMRSKPP
SL2.30ch12_2120000_3020000_1	fimo	sequence_feature	2828387	2828434	5.09e-05	+	0	ID=HMM_SL2.30ch12_2120000_3020000_1_953;Name=HMM_SL2.30ch12_2120000_3020000_1_953;Score=5.09e-05;Sequence=LHTLYLTQRTSSEHIK
SL2.30ch12_2120000_3020000_1	fimo	sequence_feature	2659445	2659492	5.93e-05	+	0	ID=HMM_SL2.30ch12_2120000_3020000_1_954;Name=HMM_SL2.30ch12_2120000_3020000_1_954;Score=5.93e-05;Sequence=LEISMLFFNSLVITTK
SL2.30ch12_2120000_3020000_1	fimo	sequence_feature	2491637	2491684	6.11e-05	+	0	ID=HMM_SL2.30ch12_2120000_3020000_1_955;Name=HMM_SL2.30ch12_2120000_3020000_1_955;Score=6.11e-05;Sequence=LNLFVLIKNQLTIKTI
SL2.30ch12_2120000_3020000_1	fimo	sequence_feature	2189981	2190028	6.3e-05	+	0	ID=HMM_SL2.30ch12_2120000_3020000_1_956;Name=HMM_SL2.30ch12_2120000_3020000_1_956;Score=6.3e-05;Sequence=LVALNMSRGVENKELP
SL2.30ch12_2120000_3020000_1	fimo	sequence_feature	2942765	2942812	6.3e-05	+	0	ID=HMM_SL2.30ch12_2120000_3020000_1_957;Name=HMM_SL2.30ch12_2120000_3020000_1_957;Score=6.3e-05;Sequence=LQVLISKSNKFRGPIS
SL2.30ch12_2120000_3020000_1	fimo	sequence_feature	2949434	2949481	6.49e-05	+	0	ID=HMM_SL2.30ch12_2120000_3020000_1_958;Name=HMM_SL2.30ch12_2120000_3020000_1_958;Score=6.49e-05;Sequence=LLVLSRGSIENSLSIP
SL2.30ch12_2120000_3020000_1	fimo	sequence_feature	2556287	2556334	7.32e-05	+	0	ID=HMM_SL2.30ch12_2120000_3020000_1_959;Name=HMM_SL2.30ch12_2120000_3020000_1_959;Score=7.32e-05;Sequence=TNIYNLSNFLLVITIY
SL2.30ch12_2120000_3020000_1	fimo	sequence_feature	2961908	2961955	7.32e-05	+	0	ID=HMM_SL2.30ch12_2120000_3020000_1_960;Name=HMM_SL2.30ch12_2120000_3020000_1_960;Score=7.32e-05;Sequence=LGFLHLSSCELKDIPY
SL2.30ch12_2120000_3020000_1	fimo	sequence_feature	2975690	2975737	7.32e-05	+	0	ID=HMM_SL2.30ch12_2120000_3020000_1_961;Name=HMM_SL2.30ch12_2120000_3020000_1_961;Score=7.32e-05;Sequence=LGFLHLSSCELKDIPY
SL2.30ch12_2120000_3020000_1	fimo	sequence_feature	2987336	2987383	7.77e-05	+	0	ID=HMM_SL2.30ch12_2120000_3020000_1_962;Name=HMM_SL2.30ch12_2120000_3020000_1_962;Score=7.77e-05;Sequence=VIGLDLSCSQIVGTFH
SL2.30ch12_2120000_3020000_1	fimo	sequence_feature	2576048	2576095	8.01e-05	+	0	ID=HMM_SL2.30ch12_2120000_3020000_1_963;Name=HMM_SL2.30ch12_2120000_3020000_1_963;Score=8.01e-05;Sequence=ESTTCLAQARLQGPDP
SL2.30ch12_2120000_3020000_1	fimo	sequence_feature	2523800	2523847	9.01e-05	+	0	ID=HMM_SL2.30ch12_2120000_3020000_1_964;Name=HMM_SL2.30ch12_2120000_3020000_1_964;Score=9.01e-05;Sequence=LWSLQKSINNPSIRIK
SL2.30ch12_2120000_3020000_1	fimo	sequence_feature	2698571	2698618	9.55e-05	+	0	ID=HMM_SL2.30ch12_2120000_3020000_1_965;Name=HMM_SL2.30ch12_2120000_3020000_1_965;Score=9.55e-05;Sequence=LEQLFLVHCWCLGSIP
SL2.30ch12_2120000_3020000_1	fimo	sequence_feature	2964056	2964103	9.55e-05	+	0	ID=HMM_SL2.30ch12_2120000_3020000_1_966;Name=HMM_SL2.30ch12_2120000_3020000_1_966;Score=9.55e-05;Sequence=LSLLDLNQEKTNNHKE
SL2.30ch12_2120000_3020000_1	fimo	sequence_feature	2977838	2977885	9.55e-05	+	0	ID=HMM_SL2.30ch12_2120000_3020000_1_967;Name=HMM_SL2.30ch12_2120000_3020000_1_967;Score=9.55e-05;Sequence=LSLLDLNQEKTNNHKE
SL2.30ch12_2120000_3020000_2	fimo	sequence_feature	2962977	2963024	2.88e-17	+	1	ID=HMM_SL2.30ch12_2120000_3020000_2_968;Name=HMM_SL2.30ch12_2120000_3020000_2_968;Score=2.88e-17;Sequence=LAFLNLSQNHLIGPIP
SL2.30ch12_2120000_3020000_2	fimo	sequence_feature	2976759	2976806	2.88e-17	+	1	ID=HMM_SL2.30ch12_2120000_3020000_2_969;Name=HMM_SL2.30ch12_2120000_3020000_2_969;Score=2.88e-17;Sequence=LAFLNLSQNHLIGPIP
SL2.30ch12_2120000_3020000_2	fimo	sequence_feature	2962905	2962952	1.59e-15	+	1	ID=HMM_SL2.30ch12_2120000_3020000_2_970;Name=HMM_SL2.30ch12_2120000_3020000_2_970;Score=1.59e-15;Sequence=LEALDLSWNRLTGMIP
SL2.30ch12_2120000_3020000_2	fimo	sequence_feature	2976687	2976734	1.59e-15	+	1	ID=HMM_SL2.30ch12_2120000_3020000_2_971;Name=HMM_SL2.30ch12_2120000_3020000_2_971;Score=1.59e-15;Sequence=LEALDLSWNRLTGMIP
SL2.30ch12_2120000_3020000_2	fimo	sequence_feature	2962833	2962880	1.6e-12	+	1	ID=HMM_SL2.30ch12_2120000_3020000_2_972;Name=HMM_SL2.30ch12_2120000_3020000_2_972;Score=1.6e-12;Sequence=LWLLNLSHNNIRGDIP
SL2.30ch12_2120000_3020000_2	fimo	sequence_feature	2976615	2976662	1.6e-12	+	1	ID=HMM_SL2.30ch12_2120000_3020000_2_973;Name=HMM_SL2.30ch12_2120000_3020000_2_973;Score=1.6e-12;Sequence=LWLLNLSHNNIRGDIP
SL2.30ch12_2120000_3020000_2	fimo	sequence_feature	2968263	2968310	2.46e-08	+	1	ID=HMM_SL2.30ch12_2120000_3020000_2_974;Name=HMM_SL2.30ch12_2120000_3020000_2_974;Score=2.46e-08;Sequence=LRHLNLSDAWFQGKIP
SL2.30ch12_2120000_3020000_2	fimo	sequence_feature	2962557	2962604	1.04e-07	+	1	ID=HMM_SL2.30ch12_2120000_3020000_2_975;Name=HMM_SL2.30ch12_2120000_3020000_2_975;Score=1.04e-07;Sequence=LRIFDLSRNNFSGSLP
SL2.30ch12_2120000_3020000_2	fimo	sequence_feature	2976339	2976386	1.04e-07	+	1	ID=HMM_SL2.30ch12_2120000_3020000_2_976;Name=HMM_SL2.30ch12_2120000_3020000_2_976;Score=1.04e-07;Sequence=LRIFDLSRNNFSGSLP
SL2.30ch12_2120000_3020000_2	fimo	sequence_feature	2962479	2962526	3.56e-07	+	1	ID=HMM_SL2.30ch12_2120000_3020000_2_977;Name=HMM_SL2.30ch12_2120000_3020000_2_977;Score=3.56e-07;Sequence=LQVLVLKSNKFHGPIS
SL2.30ch12_2120000_3020000_2	fimo	sequence_feature	2976261	2976308	3.56e-07	+	1	ID=HMM_SL2.30ch12_2120000_3020000_2_978;Name=HMM_SL2.30ch12_2120000_3020000_2_978;Score=3.56e-07;Sequence=LQVLVLKSNKFHGPIS
SL2.30ch12_2120000_3020000_2	fimo	sequence_feature	2962761	2962808	3.82e-07	+	1	ID=HMM_SL2.30ch12_2120000_3020000_2_979;Name=HMM_SL2.30ch12_2120000_3020000_2_979;Score=3.82e-07;Sequence=MTTIDLSSNHFEGVIP
SL2.30ch12_2120000_3020000_2	fimo	sequence_feature	2976543	2976590	3.82e-07	+	1	ID=HMM_SL2.30ch12_2120000_3020000_2_980;Name=HMM_SL2.30ch12_2120000_3020000_2_980;Score=3.82e-07;Sequence=MTTIDLSSNHFEGVIP
SL2.30ch12_2120000_3020000_2	fimo	sequence_feature	2963772	2963819	7.78e-07	+	1	ID=HMM_SL2.30ch12_2120000_3020000_2_981;Name=HMM_SL2.30ch12_2120000_3020000_2_981;Score=7.78e-07;Sequence=LEDLYLSPNQFNGFFP
SL2.30ch12_2120000_3020000_2	fimo	sequence_feature	2977554	2977601	7.78e-07	+	1	ID=HMM_SL2.30ch12_2120000_3020000_2_982;Name=HMM_SL2.30ch12_2120000_3020000_2_982;Score=7.78e-07;Sequence=LEDLYLSPNQFNGFFP
SL2.30ch12_2120000_3020000_2	fimo	sequence_feature	2991687	2991734	1.09e-06	+	1	ID=HMM_SL2.30ch12_2120000_3020000_2_983;Name=HMM_SL2.30ch12_2120000_3020000_2_983;Score=1.09e-06;Sequence=LRIFYLAHNEFSGSLP
SL2.30ch12_2120000_3020000_2	fimo	sequence_feature	2673564	2673611	9.15e-06	+	1	ID=HMM_SL2.30ch12_2120000_3020000_2_984;Name=HMM_SL2.30ch12_2120000_3020000_2_984;Score=9.15e-06;Sequence=FVCLSLSGNLDVGTIS
SL2.30ch12_2120000_3020000_2	fimo	sequence_feature	2991909	2991956	1.13e-05	+	1	ID=HMM_SL2.30ch12_2120000_3020000_2_985;Name=HMM_SL2.30ch12_2120000_3020000_2_985;Score=1.13e-05;Sequence=VTAVDLSSNHFEGVIS
SL2.30ch12_2120000_3020000_2	fimo	sequence_feature	2491710	2491757	1.76e-05	+	1	ID=HMM_SL2.30ch12_2120000_3020000_2_986;Name=HMM_SL2.30ch12_2120000_3020000_2_986;Score=1.76e-05;Sequence=LNVLNHSTNPDHYTSP
SL2.30ch12_2120000_3020000_2	fimo	sequence_feature	2910678	2910725	2.08e-05	+	1	ID=HMM_SL2.30ch12_2120000_3020000_2_987;Name=HMM_SL2.30ch12_2120000_3020000_2_987;Score=2.08e-05;Sequence=LFMNDLIFNRLSIKIR
SL2.30ch12_2120000_3020000_2	fimo	sequence_feature	2913768	2913815	2.08e-05	+	1	ID=HMM_SL2.30ch12_2120000_3020000_2_988;Name=HMM_SL2.30ch12_2120000_3020000_2_988;Score=2.08e-05;Sequence=NLELDLFRFLLKNHIF
SL2.30ch12_2120000_3020000_2	fimo	sequence_feature	2438790	2438837	2.26e-05	+	1	ID=HMM_SL2.30ch12_2120000_3020000_2_989;Name=HMM_SL2.30ch12_2120000_3020000_2_989;Score=2.26e-05;Sequence=LLLVSLICNHLNILNI
SL2.30ch12_2120000_3020000_2	fimo	sequence_feature	2968419	2968466	2.45e-05	+	1	ID=HMM_SL2.30ch12_2120000_3020000_2_990;Name=HMM_SL2.30ch12_2120000_3020000_2_990;Score=2.45e-05;Sequence=LEVLSLSQVIISSPLP
SL2.30ch12_2120000_3020000_2	fimo	sequence_feature	2314788	2314835	2.52e-05	+	1	ID=HMM_SL2.30ch12_2120000_3020000_2_991;Name=HMM_SL2.30ch12_2120000_3020000_2_991;Score=2.52e-05;Sequence=LNDLCLLRNVLCRDIK
SL2.30ch12_2120000_3020000_2	fimo	sequence_feature	2877795	2877842	2.82e-05	+	1	ID=HMM_SL2.30ch12_2120000_3020000_2_992;Name=HMM_SL2.30ch12_2120000_3020000_2_992;Score=2.82e-05;Sequence=LTQLNKLQNLTELTIR
SL2.30ch12_2120000_3020000_2	fimo	sequence_feature	2458941	2458988	3.35e-05	+	1	ID=HMM_SL2.30ch12_2120000_3020000_2_993;Name=HMM_SL2.30ch12_2120000_3020000_2_993;Score=3.35e-05;Sequence=ARVLDLSHYRASCSPP
SL2.30ch12_2120000_3020000_2	fimo	sequence_feature	2962407	2962454	3.45e-05	+	1	ID=HMM_SL2.30ch12_2120000_3020000_2_994;Name=HMM_SL2.30ch12_2120000_3020000_2_994;Score=3.45e-05;Sequence=LEVLDVGNNAINDTFP
SL2.30ch12_2120000_3020000_2	fimo	sequence_feature	2976189	2976236	3.45e-05	+	1	ID=HMM_SL2.30ch12_2120000_3020000_2_995;Name=HMM_SL2.30ch12_2120000_3020000_2_995;Score=3.45e-05;Sequence=LEVLDVGNNAINDTFP
SL2.30ch12_2120000_3020000_2	fimo	sequence_feature	2932755	2932802	3.77e-05	+	1	ID=HMM_SL2.30ch12_2120000_3020000_2_996;Name=HMM_SL2.30ch12_2120000_3020000_2_996;Score=3.77e-05;Sequence=LTSLYDSYNKLMQDFI
SL2.30ch12_2120000_3020000_2	fimo	sequence_feature	2907276	2907323	4.12e-05	+	1	ID=HMM_SL2.30ch12_2120000_3020000_2_997;Name=HMM_SL2.30ch12_2120000_3020000_2_997;Score=4.12e-05;Sequence=LNKYIGFFSNLSGTII
SL2.30ch12_2120000_3020000_2	fimo	sequence_feature	2183697	2183744	4.25e-05	+	1	ID=HMM_SL2.30ch12_2120000_3020000_2_998;Name=HMM_SL2.30ch12_2120000_3020000_2_998;Score=4.25e-05;Sequence=IENVHLSFLNLIYKIK
SL2.30ch12_2120000_3020000_2	fimo	sequence_feature	2818581	2818628	4.25e-05	+	1	ID=HMM_SL2.30ch12_2120000_3020000_2_999;Name=HMM_SL2.30ch12_2120000_3020000_2_999;Score=4.25e-05;Sequence=LEKLDLSHCRSISNKG
SL2.30ch12_2120000_3020000_2	fimo	sequence_feature	2723244	2723291	4.38e-05	+	1	ID=HMM_SL2.30ch12_2120000_3020000_2_1000;Name=HMM_SL2.30ch12_2120000_3020000_2_1000;Score=4.38e-05;Sequence=NRFLSPSHHQQTALIP
SL2.30ch12_2120000_3020000_2	fimo	sequence_feature	2784789	2784836	5.58e-05	+	1	ID=HMM_SL2.30ch12_2120000_3020000_2_1001;Name=HMM_SL2.30ch12_2120000_3020000_2_1001;Score=5.58e-05;Sequence=CRLRYLFNRSLLGKIL
SL2.30ch12_2120000_3020000_2	fimo	sequence_feature	2794077	2794124	6.69e-05	+	1	ID=HMM_SL2.30ch12_2120000_3020000_2_1002;Name=HMM_SL2.30ch12_2120000_3020000_2_1002;Score=6.69e-05;Sequence=LELRDCGRNVVSEMII
SL2.30ch12_2120000_3020000_2	fimo	sequence_feature	2968485	2968532	6.69e-05	+	1	ID=HMM_SL2.30ch12_2120000_3020000_2_1003;Name=HMM_SL2.30ch12_2120000_3020000_2_1003;Score=6.69e-05;Sequence=LRHLDLKHTNLLGVLT
SL2.30ch12_2120000_3020000_2	fimo	sequence_feature	2709627	2709674	8.01e-05	+	1	ID=HMM_SL2.30ch12_2120000_3020000_2_1004;Name=HMM_SL2.30ch12_2120000_3020000_2_1004;Score=8.01e-05;Sequence=LLLLSPSHFHLQLKPL
SL2.30ch12_2120000_3020000_2	fimo	sequence_feature	2322531	2322578	8.75e-05	+	1	ID=HMM_SL2.30ch12_2120000_3020000_2_1005;Name=HMM_SL2.30ch12_2120000_3020000_2_1005;Score=8.75e-05;Sequence=LRDLNWSMELARGLSP
SL2.30ch12_2120000_3020000_2	fimo	sequence_feature	2438934	2438981	8.75e-05	+	1	ID=HMM_SL2.30ch12_2120000_3020000_2_1006;Name=HMM_SL2.30ch12_2120000_3020000_2_1006;Score=8.75e-05;Sequence=LLLINSIYNHLNILNI
SL2.30ch12_2120000_3020000_2	fimo	sequence_feature	2237070	2237117	9.01e-05	+	1	ID=HMM_SL2.30ch12_2120000_3020000_2_1007;Name=HMM_SL2.30ch12_2120000_3020000_2_1007;Score=9.01e-05;Sequence=LVQLNLIFLIKNINIH
SL2.30ch12_2120000_3020000_2	fimo	sequence_feature	2191023	2191070	9.27e-05	+	1	ID=HMM_SL2.30ch12_2120000_3020000_2_1008;Name=HMM_SL2.30ch12_2120000_3020000_2_1008;Score=9.27e-05;Sequence=LQQMQLCWNVQREEVP
SL2.30ch12_2120000_3020000_2	fimo	sequence_feature	2411472	2411519	9.27e-05	+	1	ID=HMM_SL2.30ch12_2120000_3020000_2_1009;Name=HMM_SL2.30ch12_2120000_3020000_2_1009;Score=9.27e-05;Sequence=LHLLVCVNTNEQSSIP
SL2.30ch12_2120000_3020000_2	fimo	sequence_feature	2217942	2217989	9.55e-05	+	1	ID=HMM_SL2.30ch12_2120000_3020000_2_1010;Name=HMM_SL2.30ch12_2120000_3020000_2_1010;Score=9.55e-05;Sequence=FFNVDLISNRFRGEIS
SL2.30ch12_2120000_3020000_2	fimo	sequence_feature	2779680	2779727	9.55e-05	+	1	ID=HMM_SL2.30ch12_2120000_3020000_2_1011;Name=HMM_SL2.30ch12_2120000_3020000_2_1011;Score=9.55e-05;Sequence=LQFRDCGRNTASEMII
SL2.30ch12_2120000_3020000_3	fimo	sequence_feature	2956501	2956548	8.77e-19	+	2	ID=HMM_SL2.30ch12_2120000_3020000_3_1012;Name=HMM_SL2.30ch12_2120000_3020000_3_1012;Score=8.77e-19;Sequence=LWLLNLSHNNLIGHIP
SL2.30ch12_2120000_3020000_3	fimo	sequence_feature	2970283	2970330	8.77e-19	+	2	ID=HMM_SL2.30ch12_2120000_3020000_3_1013;Name=HMM_SL2.30ch12_2120000_3020000_3_1013;Score=8.77e-19;Sequence=LWLLNLSHNNLIGHIP
SL2.30ch12_2120000_3020000_3	fimo	sequence_feature	2956645	2956692	1.37e-15	+	2	ID=HMM_SL2.30ch12_2120000_3020000_3_1014;Name=HMM_SL2.30ch12_2120000_3020000_3_1014;Score=1.37e-15;Sequence=LSVLNLSQNHLIGPIP
SL2.30ch12_2120000_3020000_3	fimo	sequence_feature	2970427	2970474	1.37e-15	+	2	ID=HMM_SL2.30ch12_2120000_3020000_3_1015;Name=HMM_SL2.30ch12_2120000_3020000_3_1015;Score=1.37e-15;Sequence=LSVLNLSQNHLIGPIP
SL2.30ch12_2120000_3020000_3	fimo	sequence_feature	2956573	2956620	4.73e-15	+	2	ID=HMM_SL2.30ch12_2120000_3020000_3_1016;Name=HMM_SL2.30ch12_2120000_3020000_3_1016;Score=4.73e-15;Sequence=LEALDLSWNRLTGKIP
SL2.30ch12_2120000_3020000_3	fimo	sequence_feature	2970355	2970402	4.73e-15	+	2	ID=HMM_SL2.30ch12_2120000_3020000_3_1017;Name=HMM_SL2.30ch12_2120000_3020000_3_1017;Score=4.73e-15;Sequence=LEALDLSWNRLTGKIP
SL2.30ch12_2120000_3020000_3	fimo	sequence_feature	2955274	2955321	7.75e-15	+	2	ID=HMM_SL2.30ch12_2120000_3020000_3_1018;Name=HMM_SL2.30ch12_2120000_3020000_3_1018;Score=7.75e-15;Sequence=LIHLNLSYNSLNGTIP
SL2.30ch12_2120000_3020000_3	fimo	sequence_feature	2969056	2969103	7.75e-15	+	2	ID=HMM_SL2.30ch12_2120000_3020000_3_1019;Name=HMM_SL2.30ch12_2120000_3020000_3_1019;Score=7.75e-15;Sequence=LIHLNLSYNSLNGTIP
SL2.30ch12_2120000_3020000_3	fimo	sequence_feature	2995930	2995977	2.11e-14	+	2	ID=HMM_SL2.30ch12_2120000_3020000_3_1020;Name=HMM_SL2.30ch12_2120000_3020000_3_1020;Score=2.11e-14;Sequence=LAVLNLSQNVLVGPIP
SL2.30ch12_2120000_3020000_3	fimo	sequence_feature	2995786	2995833	2.59e-14	+	2	ID=HMM_SL2.30ch12_2120000_3020000_3_1021;Name=HMM_SL2.30ch12_2120000_3020000_3_1021;Score=2.59e-14;Sequence=LRLLNLSRNNLKGDIP
SL2.30ch12_2120000_3020000_3	fimo	sequence_feature	2994571	2994618	5.92e-12	+	2	ID=HMM_SL2.30ch12_2120000_3020000_3_1022;Name=HMM_SL2.30ch12_2120000_3020000_3_1022;Score=5.92e-12;Sequence=LTELDFSYNSLNGTIP
SL2.30ch12_2120000_3020000_3	fimo	sequence_feature	2955706	2955753	6.23e-12	+	2	ID=HMM_SL2.30ch12_2120000_3020000_3_1023;Name=HMM_SL2.30ch12_2120000_3020000_3_1023;Score=6.23e-12;Sequence=LIFLNLSHNSLTGNLP
SL2.30ch12_2120000_3020000_3	fimo	sequence_feature	2969488	2969535	6.23e-12	+	2	ID=HMM_SL2.30ch12_2120000_3020000_3_1024;Name=HMM_SL2.30ch12_2120000_3020000_3_1024;Score=6.23e-12;Sequence=LIFLNLSHNSLTGNLP
SL2.30ch12_2120000_3020000_3	fimo	sequence_feature	2995858	2995905	6.56e-12	+	2	ID=HMM_SL2.30ch12_2120000_3020000_3_1025;Name=HMM_SL2.30ch12_2120000_3020000_3_1025;Score=6.56e-12;Sequence=LEAMDLSWNRLTGNIP
SL2.30ch12_2120000_3020000_3	fimo	sequence_feature	2955058	2955105	1.68e-11	+	2	ID=HMM_SL2.30ch12_2120000_3020000_3_1026;Name=HMM_SL2.30ch12_2120000_3020000_3_1026;Score=1.68e-11;Sequence=LTRLDLSSNSFSGEIP
SL2.30ch12_2120000_3020000_3	fimo	sequence_feature	2968840	2968887	1.68e-11	+	2	ID=HMM_SL2.30ch12_2120000_3020000_3_1027;Name=HMM_SL2.30ch12_2120000_3020000_3_1027;Score=1.68e-11;Sequence=LTRLDLSSNSFSGEIP
SL2.30ch12_2120000_3020000_3	fimo	sequence_feature	2995003	2995050	1.18e-10	+	2	ID=HMM_SL2.30ch12_2120000_3020000_3_1028;Name=HMM_SL2.30ch12_2120000_3020000_3_1028;Score=1.18e-10;Sequence=LRFLNLSYNSLTGYLP
SL2.30ch12_2120000_3020000_3	fimo	sequence_feature	2991232	2991279	1.3e-10	+	2	ID=HMM_SL2.30ch12_2120000_3020000_3_1029;Name=HMM_SL2.30ch12_2120000_3020000_3_1029;Score=1.3e-10;Sequence=LWFLNLSHNSLVGHLQ
SL2.30ch12_2120000_3020000_3	fimo	sequence_feature	2955202	2955249	4.48e-10	+	2	ID=HMM_SL2.30ch12_2120000_3020000_3_1030;Name=HMM_SL2.30ch12_2120000_3020000_3_1030;Score=4.48e-10;Sequence=LEHLGLSSNSLSGPLP
SL2.30ch12_2120000_3020000_3	fimo	sequence_feature	2968984	2969031	4.48e-10	+	2	ID=HMM_SL2.30ch12_2120000_3020000_3_1031;Name=HMM_SL2.30ch12_2120000_3020000_3_1031;Score=4.48e-10;Sequence=LEHLGLSSNSLSGPLP
SL2.30ch12_2120000_3020000_3	fimo	sequence_feature	2994499	2994546	5.23e-10	+	2	ID=HMM_SL2.30ch12_2120000_3020000_3_1032;Name=HMM_SL2.30ch12_2120000_3020000_3_1032;Score=5.23e-10;Sequence=LEYLGLSSNSLSGPLP
SL2.30ch12_2120000_3020000_3	fimo	sequence_feature	2990869	2990916	7.21e-10	+	2	ID=HMM_SL2.30ch12_2120000_3020000_3_1033;Name=HMM_SL2.30ch12_2120000_3020000_3_1033;Score=7.21e-10;Sequence=LTELDFSYNSLNGTIL
SL2.30ch12_2120000_3020000_3	fimo	sequence_feature	2995141	2995188	8.88e-10	+	2	ID=HMM_SL2.30ch12_2120000_3020000_3_1034;Name=HMM_SL2.30ch12_2120000_3020000_3_1034;Score=8.88e-10;Sequence=LSLLDLSHNNFSGSIT
SL2.30ch12_2120000_3020000_3	fimo	sequence_feature	2995069	2995116	1.26e-09	+	2	ID=HMM_SL2.30ch12_2120000_3020000_3_1035;Name=HMM_SL2.30ch12_2120000_3020000_3_1035;Score=1.26e-09;Sequence=LGYLDLKFNSLHGPLP
SL2.30ch12_2120000_3020000_3	fimo	sequence_feature	2994715	2994762	1.45e-09	+	2	ID=HMM_SL2.30ch12_2120000_3020000_3_1036;Name=HMM_SL2.30ch12_2120000_3020000_3_1036;Score=1.45e-09;Sequence=LKDLHLSHNQLSGSFP
SL2.30ch12_2120000_3020000_3	fimo	sequence_feature	2955772	2955819	1.74e-09	+	2	ID=HMM_SL2.30ch12_2120000_3020000_3_1037;Name=HMM_SL2.30ch12_2120000_3020000_3_1037;Score=1.74e-09;Sequence=LGYLDLKFNSLQGPLP
SL2.30ch12_2120000_3020000_3	fimo	sequence_feature	2969554	2969601	1.74e-09	+	2	ID=HMM_SL2.30ch12_2120000_3020000_3_1038;Name=HMM_SL2.30ch12_2120000_3020000_3_1038;Score=1.74e-09;Sequence=LGYLDLKFNSLQGPLP
SL2.30ch12_2120000_3020000_3	fimo	sequence_feature	2991154	2991201	2e-09	+	2	ID=HMM_SL2.30ch12_2120000_3020000_3_1039;Name=HMM_SL2.30ch12_2120000_3020000_3_1039;Score=2e-09;Sequence=LEFLDISNNKIHGQIP
SL2.30ch12_2120000_3020000_3	fimo	sequence_feature	2994925	2994972	3.2e-09	+	2	ID=HMM_SL2.30ch12_2120000_3020000_3_1040;Name=HMM_SL2.30ch12_2120000_3020000_3_1040;Score=3.2e-09;Sequence=LTVLDISNNKIHGQIP
SL2.30ch12_2120000_3020000_3	fimo	sequence_feature	2955418	2955465	3.85e-09	+	2	ID=HMM_SL2.30ch12_2120000_3020000_3_1041;Name=HMM_SL2.30ch12_2120000_3020000_3_1041;Score=3.85e-09;Sequence=LKELHLSNNQLSGSFP
SL2.30ch12_2120000_3020000_3	fimo	sequence_feature	2969200	2969247	3.85e-09	+	2	ID=HMM_SL2.30ch12_2120000_3020000_3_1042;Name=HMM_SL2.30ch12_2120000_3020000_3_1042;Score=3.85e-09;Sequence=LKELHLSNNQLSGSFP
SL2.30ch12_2120000_3020000_3	fimo	sequence_feature	2955628	2955675	5.06e-09	+	2	ID=HMM_SL2.30ch12_2120000_3020000_3_1043;Name=HMM_SL2.30ch12_2120000_3020000_3_1043;Score=5.06e-09;Sequence=LVYLDISNNKISGQIP
SL2.30ch12_2120000_3020000_3	fimo	sequence_feature	2969410	2969457	5.06e-09	+	2	ID=HMM_SL2.30ch12_2120000_3020000_3_1044;Name=HMM_SL2.30ch12_2120000_3020000_3_1044;Score=5.06e-09;Sequence=LVYLDISNNKISGQIP
SL2.30ch12_2120000_3020000_3	fimo	sequence_feature	2994427	2994474	1.51e-08	+	2	ID=HMM_SL2.30ch12_2120000_3020000_3_1045;Name=HMM_SL2.30ch12_2120000_3020000_3_1045;Score=1.51e-08;Sequence=LRHLDLSKNRFIGPFP
SL2.30ch12_2120000_3020000_3	fimo	sequence_feature	2994355	2994402	1.62e-08	+	2	ID=HMM_SL2.30ch12_2120000_3020000_3_1046;Name=HMM_SL2.30ch12_2120000_3020000_3_1046;Score=1.62e-08;Sequence=LTSLDLLSNSFSGEIP
SL2.30ch12_2120000_3020000_3	fimo	sequence_feature	2993770	2993817	2.07e-08	+	2	ID=HMM_SL2.30ch12_2120000_3020000_3_1047;Name=HMM_SL2.30ch12_2120000_3020000_3_1047;Score=2.07e-08;Sequence=LRHLNLSYFTFDGKIP
SL2.30ch12_2120000_3020000_3	fimo	sequence_feature	2954983	2955030	2.29e-08	+	2	ID=HMM_SL2.30ch12_2120000_3020000_3_1048;Name=HMM_SL2.30ch12_2120000_3020000_3_1048;Score=2.29e-08;Sequence=ITELDLSYNHFTGRII
SL2.30ch12_2120000_3020000_3	fimo	sequence_feature	2968765	2968812	2.29e-08	+	2	ID=HMM_SL2.30ch12_2120000_3020000_3_1049;Name=HMM_SL2.30ch12_2120000_3020000_3_1049;Score=2.29e-08;Sequence=ITELDLSYNHFTGRII
SL2.30ch12_2120000_3020000_3	fimo	sequence_feature	2994283	2994330	3.35e-08	+	2	ID=HMM_SL2.30ch12_2120000_3020000_3_1050;Name=HMM_SL2.30ch12_2120000_3020000_3_1050;Score=3.35e-08;Sequence=IRELILSHNLFTGHIP
SL2.30ch12_2120000_3020000_3	fimo	sequence_feature	2942272	2942319	5.77e-08	+	2	ID=HMM_SL2.30ch12_2120000_3020000_3_1051;Name=HMM_SL2.30ch12_2120000_3020000_3_1051;Score=5.77e-08;Sequence=LKFLDISNNKIRGQIP
SL2.30ch12_2120000_3020000_3	fimo	sequence_feature	2955916	2955963	5.77e-08	+	2	ID=HMM_SL2.30ch12_2120000_3020000_3_1052;Name=HMM_SL2.30ch12_2120000_3020000_3_1052;Score=5.77e-08;Sequence=LTALDLKRNNLTVSLP
SL2.30ch12_2120000_3020000_3	fimo	sequence_feature	2969698	2969745	5.77e-08	+	2	ID=HMM_SL2.30ch12_2120000_3020000_3_1053;Name=HMM_SL2.30ch12_2120000_3020000_3_1053;Score=5.77e-08;Sequence=LTALDLKRNNLTVSLP
SL2.30ch12_2120000_3020000_3	fimo	sequence_feature	2955130	2955177	7.56e-08	+	2	ID=HMM_SL2.30ch12_2120000_3020000_3_1054;Name=HMM_SL2.30ch12_2120000_3020000_3_1054;Score=7.56e-08;Sequence=LRYLDFFNNSFIGPFP
SL2.30ch12_2120000_3020000_3	fimo	sequence_feature	2968912	2968959	7.56e-08	+	2	ID=HMM_SL2.30ch12_2120000_3020000_3_1055;Name=HMM_SL2.30ch12_2120000_3020000_3_1055;Score=7.56e-08;Sequence=LRYLDFFNNSFIGPFP
SL2.30ch12_2120000_3020000_3	fimo	sequence_feature	2995213	2995260	9.21e-08	+	2	ID=HMM_SL2.30ch12_2120000_3020000_3_1056;Name=HMM_SL2.30ch12_2120000_3020000_3_1056;Score=9.21e-08;Sequence=LSVLDLRRNNFIGSLP
SL2.30ch12_2120000_3020000_3	fimo	sequence_feature	2995504	2995551	2.48e-07	+	2	ID=HMM_SL2.30ch12_2120000_3020000_3_1057;Name=HMM_SL2.30ch12_2120000_3020000_3_1057;Score=2.48e-07;Sequence=LRIFDLSCNKFSGSLP
SL2.30ch12_2120000_3020000_3	fimo	sequence_feature	2956210	2956257	2.77e-07	+	2	ID=HMM_SL2.30ch12_2120000_3020000_3_1058;Name=HMM_SL2.30ch12_2120000_3020000_3_1058;Score=2.77e-07;Sequence=LRIFDLSRNDFSGSLP
SL2.30ch12_2120000_3020000_3	fimo	sequence_feature	2969992	2970039	2.77e-07	+	2	ID=HMM_SL2.30ch12_2120000_3020000_3_1059;Name=HMM_SL2.30ch12_2120000_3020000_3_1059;Score=2.77e-07;Sequence=LRIFDLSRNDFSGSLP
SL2.30ch12_2120000_3020000_3	fimo	sequence_feature	2955844	2955891	3.44e-07	+	2	ID=HMM_SL2.30ch12_2120000_3020000_3_1060;Name=HMM_SL2.30ch12_2120000_3020000_3_1060;Score=3.44e-07;Sequence=LMLLDLSHNYLSNSVP
SL2.30ch12_2120000_3020000_3	fimo	sequence_feature	2969626	2969673	3.44e-07	+	2	ID=HMM_SL2.30ch12_2120000_3020000_3_1061;Name=HMM_SL2.30ch12_2120000_3020000_3_1061;Score=3.44e-07;Sequence=LMLLDLSHNYLSNSVP
SL2.30ch12_2120000_3020000_3	fimo	sequence_feature	2956429	2956476	3.82e-07	+	2	ID=HMM_SL2.30ch12_2120000_3020000_3_1062;Name=HMM_SL2.30ch12_2120000_3020000_3_1062;Score=3.82e-07;Sequence=TTTIDLSSNHFEGVIP
SL2.30ch12_2120000_3020000_3	fimo	sequence_feature	2970211	2970258	3.82e-07	+	2	ID=HMM_SL2.30ch12_2120000_3020000_3_1063;Name=HMM_SL2.30ch12_2120000_3020000_3_1063;Score=3.82e-07;Sequence=TTTIDLSSNHFEGVIP
SL2.30ch12_2120000_3020000_3	fimo	sequence_feature	2995714	2995761	3.82e-07	+	2	ID=HMM_SL2.30ch12_2120000_3020000_3_1064;Name=HMM_SL2.30ch12_2120000_3020000_3_1064;Score=3.82e-07;Sequence=MTTIDLSSNHFEGVIP
SL2.30ch12_2120000_3020000_3	fimo	sequence_feature	2991298	2991345	3.96e-07	+	2	ID=HMM_SL2.30ch12_2120000_3020000_3_1065;Name=HMM_SL2.30ch12_2120000_3020000_3_1065;Score=3.96e-07;Sequence=LESLDLKFNFLQGPLP
SL2.30ch12_2120000_3020000_3	fimo	sequence_feature	2968693	2968740	6.26e-07	+	2	ID=HMM_SL2.30ch12_2120000_3020000_3_1066;Name=HMM_SL2.30ch12_2120000_3020000_3_1066;Score=6.26e-07;Sequence=LKYLNLQQCQFSGSIP
SL2.30ch12_2120000_3020000_3	fimo	sequence_feature	2990797	2990844	6.26e-07	+	2	ID=HMM_SL2.30ch12_2120000_3020000_3_1067;Name=HMM_SL2.30ch12_2120000_3020000_3_1067;Score=6.26e-07;Sequence=LQSLNISSNSLSVPLP
SL2.30ch12_2120000_3020000_3	fimo	sequence_feature	2994211	2994258	6.26e-07	+	2	ID=HMM_SL2.30ch12_2120000_3020000_3_1068;Name=HMM_SL2.30ch12_2120000_3020000_3_1068;Score=6.26e-07;Sequence=LKYLNLQQCQFSGSIP
SL2.30ch12_2120000_3020000_3	fimo	sequence_feature	2991442	2991489	7.09e-07	+	2	ID=HMM_SL2.30ch12_2120000_3020000_3_1069;Name=HMM_SL2.30ch12_2120000_3020000_3_1069;Score=7.09e-07;Sequence=LLVLNLRRNNFTGCLP
SL2.30ch12_2120000_3020000_3	fimo	sequence_feature	2991514	2991561	1.06e-06	+	2	ID=HMM_SL2.30ch12_2120000_3020000_3_1070;Name=HMM_SL2.30ch12_2120000_3020000_3_1070;Score=1.06e-06;Sequence=LSTIVLNGNRFEGRVP
SL2.30ch12_2120000_3020000_3	fimo	sequence_feature	2452867	2452914	1.09e-06	+	2	ID=HMM_SL2.30ch12_2120000_3020000_3_1071;Name=HMM_SL2.30ch12_2120000_3020000_3_1071;Score=1.09e-06;Sequence=LVYLYLNTNTNNRHIG
SL2.30ch12_2120000_3020000_3	fimo	sequence_feature	2993926	2993973	1.95e-06	+	2	ID=HMM_SL2.30ch12_2120000_3020000_3_1072;Name=HMM_SL2.30ch12_2120000_3020000_3_1072;Score=1.95e-06;Sequence=LELLSLFLVNISSPIP
SL2.30ch12_2120000_3020000_3	fimo	sequence_feature	2540578	2540625	2.09e-06	+	2	ID=HMM_SL2.30ch12_2120000_3020000_3_1073;Name=HMM_SL2.30ch12_2120000_3020000_3_1073;Score=2.09e-06;Sequence=LAFLNRSCVKLVIELP
SL2.30ch12_2120000_3020000_3	fimo	sequence_feature	2956132	2956179	2.85e-06	+	2	ID=HMM_SL2.30ch12_2120000_3020000_3_1074;Name=HMM_SL2.30ch12_2120000_3020000_3_1074;Score=2.85e-06;Sequence=LQVLILKSNKFHGPIS
SL2.30ch12_2120000_3020000_3	fimo	sequence_feature	2969914	2969961	2.85e-06	+	2	ID=HMM_SL2.30ch12_2120000_3020000_3_1075;Name=HMM_SL2.30ch12_2120000_3020000_3_1075;Score=2.85e-06;Sequence=LQVLILKSNKFHGPIS
SL2.30ch12_2120000_3020000_3	fimo	sequence_feature	2991016	2991063	5.67e-06	+	2	ID=HMM_SL2.30ch12_2120000_3020000_3_1076;Name=HMM_SL2.30ch12_2120000_3020000_3_1076;Score=5.67e-06;Sequence=LYSLDLSSNNITGDAG
SL2.30ch12_2120000_3020000_3	fimo	sequence_feature	2993617	2993664	8.61e-06	+	2	ID=HMM_SL2.30ch12_2120000_3020000_3_1077;Name=HMM_SL2.30ch12_2120000_3020000_3_1077;Score=8.61e-06;Sequence=VIGLDLSCSQLVGNFH
SL2.30ch12_2120000_3020000_3	fimo	sequence_feature	2994139	2994186	1.45e-05	+	2	ID=HMM_SL2.30ch12_2120000_3020000_3_1078;Name=HMM_SL2.30ch12_2120000_3020000_3_1078;Score=1.45e-05;Sequence=LLELSIAYTGISGEIP
SL2.30ch12_2120000_3020000_3	fimo	sequence_feature	2991370	2991417	1.71e-05	+	2	ID=HMM_SL2.30ch12_2120000_3020000_3_1079;Name=HMM_SL2.30ch12_2120000_3020000_3_1079;Score=1.71e-05;Sequence=PNILDLSHNYFTDSVP
SL2.30ch12_2120000_3020000_3	fimo	sequence_feature	2455099	2455146	2.45e-05	+	2	ID=HMM_SL2.30ch12_2120000_3020000_3_1080;Name=HMM_SL2.30ch12_2120000_3020000_3_1080;Score=2.45e-05;Sequence=LLGGYINFNVLNLTIT
SL2.30ch12_2120000_3020000_3	fimo	sequence_feature	2544553	2544600	2.67e-05	+	2	ID=HMM_SL2.30ch12_2120000_3020000_3_1081;Name=HMM_SL2.30ch12_2120000_3020000_3_1081;Score=2.67e-05;Sequence=LHVLQLRVNSTKSMIG
SL2.30ch12_2120000_3020000_3	fimo	sequence_feature	2137144	2137191	3.16e-05	+	2	ID=HMM_SL2.30ch12_2120000_3020000_3_1082;Name=HMM_SL2.30ch12_2120000_3020000_3_1082;Score=3.16e-05;Sequence=WLTLDPSSNNLYILHP
SL2.30ch12_2120000_3020000_3	fimo	sequence_feature	2307472	2307519	3.45e-05	+	2	ID=HMM_SL2.30ch12_2120000_3020000_3_1083;Name=HMM_SL2.30ch12_2120000_3020000_3_1083;Score=3.45e-05;Sequence=EKNLNLSYNLARGKFE
SL2.30ch12_2120000_3020000_3	fimo	sequence_feature	2956060	2956107	3.45e-05	+	2	ID=HMM_SL2.30ch12_2120000_3020000_3_1084;Name=HMM_SL2.30ch12_2120000_3020000_3_1084;Score=3.45e-05;Sequence=LEVLDVGNNAINDTFP
SL2.30ch12_2120000_3020000_3	fimo	sequence_feature	2969842	2969889	3.45e-05	+	2	ID=HMM_SL2.30ch12_2120000_3020000_3_1085;Name=HMM_SL2.30ch12_2120000_3020000_3_1085;Score=3.45e-05;Sequence=LEVLDVGNNAINDTFP
SL2.30ch12_2120000_3020000_3	fimo	sequence_feature	2954407	2954454	3.89e-05	+	2	ID=HMM_SL2.30ch12_2120000_3020000_3_1086;Name=HMM_SL2.30ch12_2120000_3020000_3_1086;Score=3.89e-05;Sequence=LQFLNLGDDSLTVYHL
SL2.30ch12_2120000_3020000_3	fimo	sequence_feature	2884162	2884209	4.38e-05	+	2	ID=HMM_SL2.30ch12_2120000_3020000_3_1087;Name=HMM_SL2.30ch12_2120000_3020000_3_1087;Score=4.38e-05;Sequence=GNVLNKIYFFLNGSNP
SL2.30ch12_2120000_3020000_3	fimo	sequence_feature	2451019	2451066	4.94e-05	+	2	ID=HMM_SL2.30ch12_2120000_3020000_3_1088;Name=HMM_SL2.30ch12_2120000_3020000_3_1088;Score=4.94e-05;Sequence=LIENNLSYNVSMSMLL
SL2.30ch12_2120000_3020000_3	fimo	sequence_feature	2702080	2702127	4.94e-05	+	2	ID=HMM_SL2.30ch12_2120000_3020000_3_1089;Name=HMM_SL2.30ch12_2120000_3020000_3_1089;Score=4.94e-05;Sequence=LVRIQWSYCILTGEQP
SL2.30ch12_2120000_3020000_3	fimo	sequence_feature	2995429	2995476	4.94e-05	+	2	ID=HMM_SL2.30ch12_2120000_3020000_3_1090;Name=HMM_SL2.30ch12_2120000_3020000_3_1090;Score=4.94e-05;Sequence=LQVLILKSNKFHGHLS
SL2.30ch12_2120000_3020000_3	fimo	sequence_feature	2964844	2964891	5.41e-05	+	2	ID=HMM_SL2.30ch12_2120000_3020000_3_1091;Name=HMM_SL2.30ch12_2120000_3020000_3_1091;Score=5.41e-05;Sequence=QQTTQLIGNDLHQLIS
SL2.30ch12_2120000_3020000_3	fimo	sequence_feature	2978626	2978673	5.41e-05	+	2	ID=HMM_SL2.30ch12_2120000_3020000_3_1092;Name=HMM_SL2.30ch12_2120000_3020000_3_1092;Score=5.41e-05;Sequence=QQTTQLIGNDLHQLIS
SL2.30ch12_2120000_3020000_3	fimo	sequence_feature	2790376	2790423	5.75e-05	+	2	ID=HMM_SL2.30ch12_2120000_3020000_3_1093;Name=HMM_SL2.30ch12_2120000_3020000_3_1093;Score=5.75e-05;Sequence=KPILHLSSTDLSKTLP
SL2.30ch12_2120000_3020000_3	fimo	sequence_feature	2993995	2994042	5.75e-05	+	2	ID=HMM_SL2.30ch12_2120000_3020000_3_1094;Name=HMM_SL2.30ch12_2120000_3020000_3_1094;Score=5.75e-05;Sequence=LRYVDLYDTNLQGALT
SL2.30ch12_2120000_3020000_3	fimo	sequence_feature	2337466	2337513	5.93e-05	+	2	ID=HMM_SL2.30ch12_2120000_3020000_3_1095;Name=HMM_SL2.30ch12_2120000_3020000_3_1095;Score=5.93e-05;Sequence=LRLWQLYSKGLVGNIR
SL2.30ch12_2120000_3020000_3	fimo	sequence_feature	2163274	2163321	6.11e-05	+	2	ID=HMM_SL2.30ch12_2120000_3020000_3_1096;Name=HMM_SL2.30ch12_2120000_3020000_3_1096;Score=6.11e-05;Sequence=WGLLDQSNNSCHGLEL
SL2.30ch12_2120000_3020000_3	fimo	sequence_feature	2503480	2503527	6.49e-05	+	2	ID=HMM_SL2.30ch12_2120000_3020000_3_1097;Name=HMM_SL2.30ch12_2120000_3020000_3_1097;Score=6.49e-05;Sequence=LLFLFFFFCHLIISFP
SL2.30ch12_2120000_3020000_3	fimo	sequence_feature	2730247	2730294	7.77e-05	+	2	ID=HMM_SL2.30ch12_2120000_3020000_3_1098;Name=HMM_SL2.30ch12_2120000_3020000_3_1098;Score=7.77e-05;Sequence=LRKRSLFHNSFQSIIN
SL2.30ch12_2120000_3020000_3	fimo	sequence_feature	2630893	2630940	8.75e-05	+	2	ID=HMM_SL2.30ch12_2120000_3020000_3_1099;Name=HMM_SL2.30ch12_2120000_3020000_3_1099;Score=8.75e-05;Sequence=LIFLLLFSNLLLYQFL
SL2.30ch12_2120000_3020000_3	fimo	sequence_feature	2522917	2522964	9.55e-05	+	2	ID=HMM_SL2.30ch12_2120000_3020000_3_1100;Name=HMM_SL2.30ch12_2120000_3020000_3_1100;Score=9.55e-05;Sequence=LCFIYLFTHLLSFMIS
SL2.30ch12_2120000_3020000_3	fimo	sequence_feature	2805301	2805348	9.82e-05	+	2	ID=HMM_SL2.30ch12_2120000_3020000_3_1101;Name=HMM_SL2.30ch12_2120000_3020000_3_1101;Score=9.82e-05;Sequence=MLILSQSHNHIHANIQ
SL2.30ch12_2120000_3020000_3	fimo	sequence_feature	2812210	2812257	9.82e-05	+	2	ID=HMM_SL2.30ch12_2120000_3020000_3_1102;Name=HMM_SL2.30ch12_2120000_3020000_3_1102;Score=9.82e-05;Sequence=MLILSQSHNHIHANIQ
SL2.30ch12_2120000_3020000_4	fimo	sequence_feature	2769930	2769977	3.81e-16	-	0	ID=HMM_SL2.30ch12_2120000_3020000_4_1103;Name=HMM_SL2.30ch12_2120000_3020000_4_1103;Score=3.81e-16;Sequence=LWLLNLSHNNLRGDIP
SL2.30ch12_2120000_3020000_4	fimo	sequence_feature	2769786	2769833	3.81e-16	-	0	ID=HMM_SL2.30ch12_2120000_3020000_4_1104;Name=HMM_SL2.30ch12_2120000_3020000_4_1104;Score=3.81e-16;Sequence=LAFLNLSQNHLVGRIP
SL2.30ch12_2120000_3020000_4	fimo	sequence_feature	2769858	2769905	1.01e-15	-	0	ID=HMM_SL2.30ch12_2120000_3020000_4_1105;Name=HMM_SL2.30ch12_2120000_3020000_4_1105;Score=1.01e-15;Sequence=LEALDLSWNQLTGMIP
SL2.30ch12_2120000_3020000_4	fimo	sequence_feature	2771397	2771444	2.48e-13	-	0	ID=HMM_SL2.30ch12_2120000_3020000_4_1106;Name=HMM_SL2.30ch12_2120000_3020000_4_1106;Score=2.48e-13;Sequence=LTRLDLSFNSLGGKIP
SL2.30ch12_2120000_3020000_4	fimo	sequence_feature	2771541	2771588	6.73e-13	-	0	ID=HMM_SL2.30ch12_2120000_3020000_4_1107;Name=HMM_SL2.30ch12_2120000_3020000_4_1107;Score=6.73e-13;Sequence=LQTLNLAYNNLSGLIP
SL2.30ch12_2120000_3020000_4	fimo	sequence_feature	2771181	2771228	1.01e-11	-	0	ID=HMM_SL2.30ch12_2120000_3020000_4_1108;Name=HMM_SL2.30ch12_2120000_3020000_4_1108;Score=1.01e-11;Sequence=LVDLDFSHNSLNGTIP
SL2.30ch12_2120000_3020000_4	fimo	sequence_feature	2771253	2771300	1.5e-11	-	0	ID=HMM_SL2.30ch12_2120000_3020000_4_1109;Name=HMM_SL2.30ch12_2120000_3020000_4_1109;Score=1.5e-11;Sequence=LENLDLSSNSLSGPLP
SL2.30ch12_2120000_3020000_4	fimo	sequence_feature	2770752	2770799	1.08e-10	-	0	ID=HMM_SL2.30ch12_2120000_3020000_4_1110;Name=HMM_SL2.30ch12_2120000_3020000_4_1110;Score=1.08e-10;Sequence=LFHLNLSYNSLNGHID
SL2.30ch12_2120000_3020000_4	fimo	sequence_feature	2771469	2771516	2.41e-09	-	0	ID=HMM_SL2.30ch12_2120000_3020000_4_1111;Name=HMM_SL2.30ch12_2120000_3020000_4_1111;Score=2.41e-09;Sequence=IRELNFGSNNLTGHIP
SL2.30ch12_2120000_3020000_4	fimo	sequence_feature	2770215	2770262	3.85e-09	-	0	ID=HMM_SL2.30ch12_2120000_3020000_4_1112;Name=HMM_SL2.30ch12_2120000_3020000_4_1112;Score=3.85e-09;Sequence=LRILDLSHNEFIGSLP
SL2.30ch12_2120000_3020000_4	fimo	sequence_feature	2770830	2770877	4.84e-09	-	0	ID=HMM_SL2.30ch12_2120000_3020000_4_1113;Name=HMM_SL2.30ch12_2120000_3020000_4_1113;Score=4.84e-09;Sequence=LRVINLSNNKIRGQIP
SL2.30ch12_2120000_3020000_4	fimo	sequence_feature	2771325	2771372	3.72e-08	-	0	ID=HMM_SL2.30ch12_2120000_3020000_4_1114;Name=HMM_SL2.30ch12_2120000_3020000_4_1114;Score=3.72e-08;Sequence=LVSLYLSYNSFIGPFP
SL2.30ch12_2120000_3020000_4	fimo	sequence_feature	2770542	2770589	5.77e-08	-	0	ID=HMM_SL2.30ch12_2120000_3020000_4_1115;Name=HMM_SL2.30ch12_2120000_3020000_4_1115;Score=5.77e-08;Sequence=LTVLDLRRNNFSGSLP
SL2.30ch12_2120000_3020000_4	fimo	sequence_feature	2770614	2770661	7.31e-07	-	0	ID=HMM_SL2.30ch12_2120000_3020000_4_1116;Name=HMM_SL2.30ch12_2120000_3020000_4_1116;Score=7.31e-07;Sequence=VSLLDLSHNYFSNSIP
SL2.30ch12_2120000_3020000_4	fimo	sequence_feature	2770434	2770481	1.36e-06	-	0	ID=HMM_SL2.30ch12_2120000_3020000_4_1117;Name=HMM_SL2.30ch12_2120000_3020000_4_1117;Score=1.36e-06;Sequence=LTTIILNDNHFEGHVP
SL2.30ch12_2120000_3020000_4	fimo	sequence_feature	2770686	2770733	1.4e-06	-	0	ID=HMM_SL2.30ch12_2120000_3020000_4_1118;Name=HMM_SL2.30ch12_2120000_3020000_4_1118;Score=1.4e-06;Sequence=LVSLDLKSNFLEGALP
SL2.30ch12_2120000_3020000_4	fimo	sequence_feature	2771040	2771087	1.82e-06	-	0	ID=HMM_SL2.30ch12_2120000_3020000_4_1119;Name=HMM_SL2.30ch12_2120000_3020000_4_1119;Score=1.82e-06;Sequence=VGRLDLSYNQLSSPVL
SL2.30ch12_2120000_3020000_4	fimo	sequence_feature	2770968	2771015	2.65e-06	-	0	ID=HMM_SL2.30ch12_2120000_3020000_4_1120;Name=HMM_SL2.30ch12_2120000_3020000_4_1120;Score=2.65e-06;Sequence=LVNLDLSSNNITVDGG
SL2.30ch12_2120000_3020000_4	fimo	sequence_feature	2770290	2770337	2.85e-06	-	0	ID=HMM_SL2.30ch12_2120000_3020000_4_1121;Name=HMM_SL2.30ch12_2120000_3020000_4_1121;Score=2.85e-06;Sequence=LQVLILKSNKFHGPIS
SL2.30ch12_2120000_3020000_4	fimo	sequence_feature	2770002	2770049	8.34e-06	-	0	ID=HMM_SL2.30ch12_2120000_3020000_4_1122;Name=HMM_SL2.30ch12_2120000_3020000_4_1122;Score=8.34e-06;Sequence=MTAIDLSSNYFEGVIP
SL2.30ch12_2120000_3020000_4	fimo	sequence_feature	2424066	2424113	2.45e-05	-	0	ID=HMM_SL2.30ch12_2120000_3020000_4_1123;Name=HMM_SL2.30ch12_2120000_3020000_4_1123;Score=2.45e-05;Sequence=LWRNILSNNLVTVTLP
SL2.30ch12_2120000_3020000_4	fimo	sequence_feature	2588076	2588123	2.52e-05	-	0	ID=HMM_SL2.30ch12_2120000_3020000_4_1124;Name=HMM_SL2.30ch12_2120000_3020000_4_1124;Score=2.52e-05;Sequence=NTHLKLSQRLLVLPIS
SL2.30ch12_2120000_3020000_4	fimo	sequence_feature	2740965	2741012	2.67e-05	-	0	ID=HMM_SL2.30ch12_2120000_3020000_4_1125;Name=HMM_SL2.30ch12_2120000_3020000_4_1125;Score=2.67e-05;Sequence=GIFLILFFNKSYTHIP
SL2.30ch12_2120000_3020000_4	fimo	sequence_feature	2459184	2459231	2.67e-05	-	0	ID=HMM_SL2.30ch12_2120000_3020000_4_1126;Name=HMM_SL2.30ch12_2120000_3020000_4_1126;Score=2.67e-05;Sequence=LYFLGLSFKLLICNIT
SL2.30ch12_2120000_3020000_4	fimo	sequence_feature	2125278	2125325	2.99e-05	-	0	ID=HMM_SL2.30ch12_2120000_3020000_4_1127;Name=HMM_SL2.30ch12_2120000_3020000_4_1127;Score=2.99e-05;Sequence=LRKLNSLQNQLEKTKN
SL2.30ch12_2120000_3020000_4	fimo	sequence_feature	2770362	2770409	3.45e-05	-	0	ID=HMM_SL2.30ch12_2120000_3020000_4_1128;Name=HMM_SL2.30ch12_2120000_3020000_4_1128;Score=3.45e-05;Sequence=LEVLDIGNNAINDTFP
SL2.30ch12_2120000_3020000_4	fimo	sequence_feature	2697930	2697977	4.25e-05	-	0	ID=HMM_SL2.30ch12_2120000_3020000_4_1129;Name=HMM_SL2.30ch12_2120000_3020000_4_1129;Score=4.25e-05;Sequence=TAILKIIYNQLTGHLH
SL2.30ch12_2120000_3020000_4	fimo	sequence_feature	2483316	2483363	4.25e-05	-	0	ID=HMM_SL2.30ch12_2120000_3020000_4_1130;Name=HMM_SL2.30ch12_2120000_3020000_4_1130;Score=4.25e-05;Sequence=LRLLSTDQQHTNSSIP
SL2.30ch12_2120000_3020000_4	fimo	sequence_feature	2794995	2795042	4.94e-05	-	0	ID=HMM_SL2.30ch12_2120000_3020000_4_1131;Name=HMM_SL2.30ch12_2120000_3020000_4_1131;Score=4.94e-05;Sequence=LHTLNLAYCCAEFEII
SL2.30ch12_2120000_3020000_4	fimo	sequence_feature	2462292	2462339	5.25e-05	-	0	ID=HMM_SL2.30ch12_2120000_3020000_4_1132;Name=HMM_SL2.30ch12_2120000_3020000_4_1132;Score=5.25e-05;Sequence=KNALHLLSGHLQLKIG
SL2.30ch12_2120000_3020000_4	fimo	sequence_feature	2716743	2716790	5.58e-05	-	0	ID=HMM_SL2.30ch12_2120000_3020000_4_1133;Name=HMM_SL2.30ch12_2120000_3020000_4_1133;Score=5.58e-05;Sequence=LQILNLRENRLEIWHT
SL2.30ch12_2120000_3020000_4	fimo	sequence_feature	2442105	2442152	7.54e-05	-	0	ID=HMM_SL2.30ch12_2120000_3020000_4_1134;Name=HMM_SL2.30ch12_2120000_3020000_4_1134;Score=7.54e-05;Sequence=LILLYLRFLSMIARIS
SL2.30ch12_2120000_3020000_4	fimo	sequence_feature	2185794	2185841	7.54e-05	-	0	ID=HMM_SL2.30ch12_2120000_3020000_4_1135;Name=HMM_SL2.30ch12_2120000_3020000_4_1135;Score=7.54e-05;Sequence=NTNNNNNNNDISSTIP
SL2.30ch12_2120000_3020000_4	fimo	sequence_feature	2751753	2751800	9.27e-05	-	0	ID=HMM_SL2.30ch12_2120000_3020000_4_1136;Name=HMM_SL2.30ch12_2120000_3020000_4_1136;Score=9.27e-05;Sequence=NNNLSIFGNNLIFFIL
SL2.30ch12_2120000_3020000_4	fimo	sequence_feature	2193963	2194010	9.55e-05	-	0	ID=HMM_SL2.30ch12_2120000_3020000_4_1137;Name=HMM_SL2.30ch12_2120000_3020000_4_1137;Score=9.55e-05;Sequence=LSRLKLSTFSCSFSMP
SL2.30ch12_2120000_3020000_5	fimo	sequence_feature	2778258	2778305	1.03e-16	-	1	ID=HMM_SL2.30ch12_2120000_3020000_5_1138;Name=HMM_SL2.30ch12_2120000_3020000_5_1138;Score=1.03e-16;Sequence=LWLLNLSHNNLKGDIP
SL2.30ch12_2120000_3020000_5	fimo	sequence_feature	2772594	2772641	3.19e-16	-	1	ID=HMM_SL2.30ch12_2120000_3020000_5_1139;Name=HMM_SL2.30ch12_2120000_3020000_5_1139;Score=3.19e-16;Sequence=LRLLNLSHNSLIGHIP
SL2.30ch12_2120000_3020000_5	fimo	sequence_feature	2781708	2781755	3.81e-16	-	1	ID=HMM_SL2.30ch12_2120000_3020000_5_1140;Name=HMM_SL2.30ch12_2120000_3020000_5_1140;Score=3.81e-16;Sequence=LWLLNLSHNNLRGDIP
SL2.30ch12_2120000_3020000_5	fimo	sequence_feature	2781564	2781611	3.81e-16	-	1	ID=HMM_SL2.30ch12_2120000_3020000_5_1141;Name=HMM_SL2.30ch12_2120000_3020000_5_1141;Score=3.81e-16;Sequence=LAFLNLSQNHLVGRIP
SL2.30ch12_2120000_3020000_5	fimo	sequence_feature	2781636	2781683	1.01e-15	-	1	ID=HMM_SL2.30ch12_2120000_3020000_5_1142;Name=HMM_SL2.30ch12_2120000_3020000_5_1142;Score=1.01e-15;Sequence=LEALDLSWNQLTGMIP
SL2.30ch12_2120000_3020000_5	fimo	sequence_feature	2778186	2778233	4.73e-15	-	1	ID=HMM_SL2.30ch12_2120000_3020000_5_1143;Name=HMM_SL2.30ch12_2120000_3020000_5_1143;Score=4.73e-15;Sequence=LEALDLSWNRLTGKIP
SL2.30ch12_2120000_3020000_5	fimo	sequence_feature	2772522	2772569	4.73e-15	-	1	ID=HMM_SL2.30ch12_2120000_3020000_5_1144;Name=HMM_SL2.30ch12_2120000_3020000_5_1144;Score=4.73e-15;Sequence=LEALDLSWNRLTGKIP
SL2.30ch12_2120000_3020000_5	fimo	sequence_feature	2779413	2779460	2.34e-14	-	1	ID=HMM_SL2.30ch12_2120000_3020000_5_1145;Name=HMM_SL2.30ch12_2120000_3020000_5_1145;Score=2.34e-14;Sequence=LAELDLSYNSLNGTIP
SL2.30ch12_2120000_3020000_5	fimo	sequence_feature	2778114	2778161	2.84e-13	-	1	ID=HMM_SL2.30ch12_2120000_3020000_5_1146;Name=HMM_SL2.30ch12_2120000_3020000_5_1146;Score=2.84e-13;Sequence=LSFLNLSRNLLVGRIP
SL2.30ch12_2120000_3020000_5	fimo	sequence_feature	2773995	2774042	7.94e-13	-	1	ID=HMM_SL2.30ch12_2120000_3020000_5_1147;Name=HMM_SL2.30ch12_2120000_3020000_5_1147;Score=7.94e-13;Sequence=LTQLVLSDNSLEGAIP
SL2.30ch12_2120000_3020000_5	fimo	sequence_feature	2772450	2772497	1.46e-12	-	1	ID=HMM_SL2.30ch12_2120000_3020000_5_1148;Name=HMM_SL2.30ch12_2120000_3020000_5_1148;Score=1.46e-12;Sequence=LEFLNLSQNHFVGRIP
SL2.30ch12_2120000_3020000_5	fimo	sequence_feature	2782503	2782550	3.48e-12	-	1	ID=HMM_SL2.30ch12_2120000_3020000_5_1149;Name=HMM_SL2.30ch12_2120000_3020000_5_1149;Score=3.48e-12;Sequence=LLHLNLSHNSLTGHLP
SL2.30ch12_2120000_3020000_5	fimo	sequence_feature	2773851	2773898	3.64e-12	-	1	ID=HMM_SL2.30ch12_2120000_3020000_5_1150;Name=HMM_SL2.30ch12_2120000_3020000_5_1150;Score=3.64e-12;Sequence=LRYLDLSHNSLNGTIH
SL2.30ch12_2120000_3020000_5	fimo	sequence_feature	2779485	2779532	7.28e-12	-	1	ID=HMM_SL2.30ch12_2120000_3020000_5_1151;Name=HMM_SL2.30ch12_2120000_3020000_5_1151;Score=7.28e-12;Sequence=LETLDLSSNSLSGPLP
SL2.30ch12_2120000_3020000_5	fimo	sequence_feature	2773710	2773757	9.02e-12	-	1	ID=HMM_SL2.30ch12_2120000_3020000_5_1152;Name=HMM_SL2.30ch12_2120000_3020000_5_1152;Score=9.02e-12;Sequence=LETLYLSHNQLNGPFP
SL2.30ch12_2120000_3020000_5	fimo	sequence_feature	2794026	2794073	1.68e-11	-	1	ID=HMM_SL2.30ch12_2120000_3020000_5_1153;Name=HMM_SL2.30ch12_2120000_3020000_5_1153;Score=1.68e-11;Sequence=LTRLDLSSNSFSGEIP
SL2.30ch12_2120000_3020000_5	fimo	sequence_feature	2793882	2793929	3.28e-10	-	1	ID=HMM_SL2.30ch12_2120000_3020000_5_1154;Name=HMM_SL2.30ch12_2120000_3020000_5_1154;Score=3.28e-10;Sequence=LDTLDLSSNSLSGPLP
SL2.30ch12_2120000_3020000_5	fimo	sequence_feature	2782362	2782409	3.55e-10	-	1	ID=HMM_SL2.30ch12_2120000_3020000_5_1155;Name=HMM_SL2.30ch12_2120000_3020000_5_1155;Score=3.55e-10;Sequence=LEFLDLSHNNFSNSIP
SL2.30ch12_2120000_3020000_5	fimo	sequence_feature	2779053	2779100	4.66e-10	-	1	ID=HMM_SL2.30ch12_2120000_3020000_5_1156;Name=HMM_SL2.30ch12_2120000_3020000_5_1156;Score=4.66e-10;Sequence=LLHLNLSHNSLTGHLQ
SL2.30ch12_2120000_3020000_5	fimo	sequence_feature	2782290	2782337	9.27e-10	-	1	ID=HMM_SL2.30ch12_2120000_3020000_5_1157;Name=HMM_SL2.30ch12_2120000_3020000_5_1157;Score=9.27e-10;Sequence=LTVLDLRRNNFTGSIP
SL2.30ch12_2120000_3020000_5	fimo	sequence_feature	2779629	2779676	1.59e-09	-	1	ID=HMM_SL2.30ch12_2120000_3020000_5_1158;Name=HMM_SL2.30ch12_2120000_3020000_5_1158;Score=1.59e-09;Sequence=LAVLTLSSNSFGGEIP
SL2.30ch12_2120000_3020000_5	fimo	sequence_feature	2782791	2782838	1.82e-09	-	1	ID=HMM_SL2.30ch12_2120000_3020000_5_1159;Name=HMM_SL2.30ch12_2120000_3020000_5_1159;Score=1.82e-09;Sequence=LRELHLSNNQLSGIFP
SL2.30ch12_2120000_3020000_5	fimo	sequence_feature	2793810	2793857	2.53e-09	-	1	ID=HMM_SL2.30ch12_2120000_3020000_5_1160;Name=HMM_SL2.30ch12_2120000_3020000_5_1160;Score=2.53e-09;Sequence=LTELVLSYNSLNGTVR
SL2.30ch12_2120000_3020000_5	fimo	sequence_feature	2773284	2773331	2.53e-09	-	1	ID=HMM_SL2.30ch12_2120000_3020000_5_1161;Name=HMM_SL2.30ch12_2120000_3020000_5_1161;Score=2.53e-09;Sequence=LRILDLSRNNFSNSIP
SL2.30ch12_2120000_3020000_5	fimo	sequence_feature	2794170	2794217	6.03e-09	-	1	ID=HMM_SL2.30ch12_2120000_3020000_5_1162;Name=HMM_SL2.30ch12_2120000_3020000_5_1162;Score=6.03e-09;Sequence=LNILNLRGCQLSGSIP
SL2.30ch12_2120000_3020000_5	fimo	sequence_feature	2773923	2773970	1.86e-08	-	1	ID=HMM_SL2.30ch12_2120000_3020000_5_1163;Name=HMM_SL2.30ch12_2120000_3020000_5_1163;Score=1.86e-08;Sequence=LVSLDLSNNNFTGPFP
SL2.30ch12_2120000_3020000_5	fimo	sequence_feature	2779773	2779820	1.93e-08	-	1	ID=HMM_SL2.30ch12_2120000_3020000_5_1164;Name=HMM_SL2.30ch12_2120000_3020000_5_1164;Score=1.93e-08;Sequence=LTRLYLFGCQFSGRIP
SL2.30ch12_2120000_3020000_5	fimo	sequence_feature	2778987	2779034	2.22e-08	-	1	ID=HMM_SL2.30ch12_2120000_3020000_5_1165;Name=HMM_SL2.30ch12_2120000_3020000_5_1165;Score=2.22e-08;Sequence=LESLDLKFNSLQGPLP
SL2.30ch12_2120000_3020000_5	fimo	sequence_feature	2773422	2773469	2.37e-08	-	1	ID=HMM_SL2.30ch12_2120000_3020000_5_1166;Name=HMM_SL2.30ch12_2120000_3020000_5_1166;Score=2.37e-08;Sequence=LEHLNVSHNLLTGHLG
SL2.30ch12_2120000_3020000_5	fimo	sequence_feature	2794611	2794658	2.46e-08	-	1	ID=HMM_SL2.30ch12_2120000_3020000_5_1167;Name=HMM_SL2.30ch12_2120000_3020000_5_1167;Score=2.46e-08;Sequence=LRHLNLSDAWFQGKIP
SL2.30ch12_2120000_3020000_5	fimo	sequence_feature	2793954	2794001	2.63e-08	-	1	ID=HMM_SL2.30ch12_2120000_3020000_5_1168;Name=HMM_SL2.30ch12_2120000_3020000_5_1168;Score=2.63e-08;Sequence=LRNLYLNDNSFIGSFP
SL2.30ch12_2120000_3020000_5	fimo	sequence_feature	2780220	2780267	2.82e-08	-	1	ID=HMM_SL2.30ch12_2120000_3020000_5_1169;Name=HMM_SL2.30ch12_2120000_3020000_5_1169;Score=2.82e-08;Sequence=LRHLNLSDAYFQGEIP
SL2.30ch12_2120000_3020000_5	fimo	sequence_feature	2772666	2772713	2.92e-08	-	1	ID=HMM_SL2.30ch12_2120000_3020000_5_1170;Name=HMM_SL2.30ch12_2120000_3020000_5_1170;Score=2.92e-08;Sequence=DTAIDLSCNHFEGEIP
SL2.30ch12_2120000_3020000_5	fimo	sequence_feature	2773212	2773259	3.23e-08	-	1	ID=HMM_SL2.30ch12_2120000_3020000_5_1171;Name=HMM_SL2.30ch12_2120000_3020000_5_1171;Score=3.23e-08;Sequence=LTVLDLRSNNFSGRLP
SL2.30ch12_2120000_3020000_5	fimo	sequence_feature	2782719	2782766	5.77e-08	-	1	ID=HMM_SL2.30ch12_2120000_3020000_5_1172;Name=HMM_SL2.30ch12_2120000_3020000_5_1172;Score=5.77e-08;Sequence=LNILDLSSNNITGDAV
SL2.30ch12_2120000_3020000_5	fimo	sequence_feature	2773500	2773547	6.47e-08	-	1	ID=HMM_SL2.30ch12_2120000_3020000_5_1173;Name=HMM_SL2.30ch12_2120000_3020000_5_1173;Score=6.47e-08;Sequence=LQFLDISNNKIGGGIP
SL2.30ch12_2120000_3020000_5	fimo	sequence_feature	2778843	2778890	8.18e-08	-	1	ID=HMM_SL2.30ch12_2120000_3020000_5_1174;Name=HMM_SL2.30ch12_2120000_3020000_5_1174;Score=8.18e-08;Sequence=LSVLDLRRNNFTGSLP
SL2.30ch12_2120000_3020000_5	fimo	sequence_feature	2782434	2782481	9.59e-08	-	1	ID=HMM_SL2.30ch12_2120000_3020000_5_1175;Name=HMM_SL2.30ch12_2120000_3020000_5_1175;Score=9.59e-08;Sequence=LEYLDVKFNSLKGLLP
SL2.30ch12_2120000_3020000_5	fimo	sequence_feature	2779701	2779748	1.08e-07	-	1	ID=HMM_SL2.30ch12_2120000_3020000_5_1176;Name=HMM_SL2.30ch12_2120000_3020000_5_1176;Score=1.08e-07;Sequence=IRYLNFGNNHFTGSIP
SL2.30ch12_2120000_3020000_5	fimo	sequence_feature	2779557	2779604	1.43e-07	-	1	ID=HMM_SL2.30ch12_2120000_3020000_5_1177;Name=HMM_SL2.30ch12_2120000_3020000_5_1177;Score=1.43e-07;Sequence=LRYLSLSNCSFIGPFP
SL2.30ch12_2120000_3020000_5	fimo	sequence_feature	2780373	2780420	1.61e-07	-	1	ID=HMM_SL2.30ch12_2120000_3020000_5_1178;Name=HMM_SL2.30ch12_2120000_3020000_5_1178;Score=1.61e-07;Sequence=VIGLDLSCSRLNGTIY
SL2.30ch12_2120000_3020000_5	fimo	sequence_feature	2782581	2782628	2.12e-07	-	1	ID=HMM_SL2.30ch12_2120000_3020000_5_1179;Name=HMM_SL2.30ch12_2120000_3020000_5_1179;Score=2.12e-07;Sequence=LTVLDISNNKIRGQFP
SL2.30ch12_2120000_3020000_5	fimo	sequence_feature	2794098	2794145	2.87e-07	-	1	ID=HMM_SL2.30ch12_2120000_3020000_5_1180;Name=HMM_SL2.30ch12_2120000_3020000_5_1180;Score=2.87e-07;Sequence=ITELDLSYNHFTDYIP
SL2.30ch12_2120000_3020000_5	fimo	sequence_feature	2778552	2778599	2.87e-07	-	1	ID=HMM_SL2.30ch12_2120000_3020000_5_1181;Name=HMM_SL2.30ch12_2120000_3020000_5_1181;Score=2.87e-07;Sequence=LRIFDLSHNEFGGSLP
SL2.30ch12_2120000_3020000_5	fimo	sequence_feature	2781996	2782043	2.98e-07	-	1	ID=HMM_SL2.30ch12_2120000_3020000_5_1182;Name=HMM_SL2.30ch12_2120000_3020000_5_1182;Score=2.98e-07;Sequence=LRIFDLSSNEFSGSLP
SL2.30ch12_2120000_3020000_5	fimo	sequence_feature	2774139	2774186	3.2e-07	-	1	ID=HMM_SL2.30ch12_2120000_3020000_5_1183;Name=HMM_SL2.30ch12_2120000_3020000_5_1183;Score=3.2e-07;Sequence=LNLLYLEGCQFSGSIP
SL2.30ch12_2120000_3020000_5	fimo	sequence_feature	2781780	2781827	3.82e-07	-	1	ID=HMM_SL2.30ch12_2120000_3020000_5_1184;Name=HMM_SL2.30ch12_2120000_3020000_5_1184;Score=3.82e-07;Sequence=MTTIDLSSNHFEGVIP
SL2.30ch12_2120000_3020000_5	fimo	sequence_feature	2778330	2778377	3.82e-07	-	1	ID=HMM_SL2.30ch12_2120000_3020000_5_1185;Name=HMM_SL2.30ch12_2120000_3020000_5_1185;Score=3.82e-07;Sequence=MTTIDLSSNHFEGVIP
SL2.30ch12_2120000_3020000_5	fimo	sequence_feature	2782218	2782265	7.09e-07	-	1	ID=HMM_SL2.30ch12_2120000_3020000_5_1186;Name=HMM_SL2.30ch12_2120000_3020000_5_1186;Score=7.09e-07;Sequence=LRTIVLNGNRFEGTVP
SL2.30ch12_2120000_3020000_5	fimo	sequence_feature	2778771	2778818	7.09e-07	-	1	ID=HMM_SL2.30ch12_2120000_3020000_5_1187;Name=HMM_SL2.30ch12_2120000_3020000_5_1187;Score=7.09e-07;Sequence=LRTIVLNGNRFEGTVP
SL2.30ch12_2120000_3020000_5	fimo	sequence_feature	2773356	2773403	7.54e-07	-	1	ID=HMM_SL2.30ch12_2120000_3020000_5_1188;Name=HMM_SL2.30ch12_2120000_3020000_5_1188;Score=7.54e-07;Sequence=LEYFDLRFNFLQGPLP
SL2.30ch12_2120000_3020000_5	fimo	sequence_feature	2780055	2780102	8.27e-07	-	1	ID=HMM_SL2.30ch12_2120000_3020000_5_1189;Name=HMM_SL2.30ch12_2120000_3020000_5_1189;Score=8.27e-07;Sequence=LEVLSLFGVDVSSPIP
SL2.30ch12_2120000_3020000_5	fimo	sequence_feature	2772921	2772968	9.64e-07	-	1	ID=HMM_SL2.30ch12_2120000_3020000_5_1190;Name=HMM_SL2.30ch12_2120000_3020000_5_1190;Score=9.64e-07;Sequence=LRIFDLSHNAFNGSLP
SL2.30ch12_2120000_3020000_5	fimo	sequence_feature	2779269	2779316	1.03e-06	-	1	ID=HMM_SL2.30ch12_2120000_3020000_5_1191;Name=HMM_SL2.30ch12_2120000_3020000_5_1191;Score=1.03e-06;Sequence=LNTLDLSSNNITLDAG
SL2.30ch12_2120000_3020000_5	fimo	sequence_feature	2773140	2773187	1.06e-06	-	1	ID=HMM_SL2.30ch12_2120000_3020000_5_1192;Name=HMM_SL2.30ch12_2120000_3020000_5_1192;Score=1.06e-06;Sequence=LTTIVLNGNQFEGSVP
SL2.30ch12_2120000_3020000_5	fimo	sequence_feature	2774067	2774114	1.24e-06	-	1	ID=HMM_SL2.30ch12_2120000_3020000_5_1193;Name=HMM_SL2.30ch12_2120000_3020000_5_1193;Score=1.24e-06;Sequence=ITELLLWGNRFTGHIP
SL2.30ch12_2120000_3020000_5	fimo	sequence_feature	2778915	2778962	1.6e-06	-	1	ID=HMM_SL2.30ch12_2120000_3020000_5_1194;Name=HMM_SL2.30ch12_2120000_3020000_5_1194;Score=1.6e-06;Sequence=LSLLDLSNNYFSDSVP
SL2.30ch12_2120000_3020000_5	fimo	sequence_feature	2779131	2779178	2.16e-06	-	1	ID=HMM_SL2.30ch12_2120000_3020000_5_1195;Name=HMM_SL2.30ch12_2120000_3020000_5_1195;Score=2.16e-06;Sequence=IMVLDISNNKIRGQIP
SL2.30ch12_2120000_3020000_5	fimo	sequence_feature	2782074	2782121	2.31e-06	-	1	ID=HMM_SL2.30ch12_2120000_3020000_5_1196;Name=HMM_SL2.30ch12_2120000_3020000_5_1196;Score=2.31e-06;Sequence=LQVLILKSNVFHGPIS
SL2.30ch12_2120000_3020000_5	fimo	sequence_feature	2779341	2779388	2.39e-06	-	1	ID=HMM_SL2.30ch12_2120000_3020000_5_1197;Name=HMM_SL2.30ch12_2120000_3020000_5_1197;Score=2.39e-06;Sequence=LSSVSLHHNRLSGSFP
SL2.30ch12_2120000_3020000_5	fimo	sequence_feature	2778627	2778674	2.85e-06	-	1	ID=HMM_SL2.30ch12_2120000_3020000_5_1198;Name=HMM_SL2.30ch12_2120000_3020000_5_1198;Score=2.85e-06;Sequence=LQVLILKSNKFHGPIS
SL2.30ch12_2120000_3020000_5	fimo	sequence_feature	2772996	2773043	2.85e-06	-	1	ID=HMM_SL2.30ch12_2120000_3020000_5_1199;Name=HMM_SL2.30ch12_2120000_3020000_5_1199;Score=2.85e-06;Sequence=LQVLILKSNKFHGPIS
SL2.30ch12_2120000_3020000_5	fimo	sequence_feature	2774424	2774471	4.47e-06	-	1	ID=HMM_SL2.30ch12_2120000_3020000_5_1200;Name=HMM_SL2.30ch12_2120000_3020000_5_1200;Score=4.47e-06;Sequence=LELLSLSEVNISSRLP
SL2.30ch12_2120000_3020000_5	fimo	sequence_feature	2782146	2782193	5.3e-06	-	1	ID=HMM_SL2.30ch12_2120000_3020000_5_1201;Name=HMM_SL2.30ch12_2120000_3020000_5_1201;Score=5.3e-06;Sequence=LEVLDVGNNVINDTFP
SL2.30ch12_2120000_3020000_5	fimo	sequence_feature	2778699	2778746	5.3e-06	-	1	ID=HMM_SL2.30ch12_2120000_3020000_5_1202;Name=HMM_SL2.30ch12_2120000_3020000_5_1202;Score=5.3e-06;Sequence=LEVLDVGNNVINDTFP
SL2.30ch12_2120000_3020000_5	fimo	sequence_feature	2773638	2773685	8.34e-06	-	1	ID=HMM_SL2.30ch12_2120000_3020000_5_1203;Name=HMM_SL2.30ch12_2120000_3020000_5_1203;Score=8.34e-06;Sequence=LDFLDFSSNNITGDVG
SL2.30ch12_2120000_3020000_5	fimo	sequence_feature	2281947	2281994	1e-05	-	1	ID=HMM_SL2.30ch12_2120000_3020000_5_1204;Name=HMM_SL2.30ch12_2120000_3020000_5_1204;Score=1e-05;Sequence=LLRIVLFYNVLHCVIL
SL2.30ch12_2120000_3020000_5	fimo	sequence_feature	2680962	2681009	1.54e-05	-	1	ID=HMM_SL2.30ch12_2120000_3020000_5_1205;Name=HMM_SL2.30ch12_2120000_3020000_5_1205;Score=1.54e-05;Sequence=LHNIDLRSNNNWYDIP
SL2.30ch12_2120000_3020000_5	fimo	sequence_feature	2511717	2511764	1.62e-05	-	1	ID=HMM_SL2.30ch12_2120000_3020000_5_1206;Name=HMM_SL2.30ch12_2120000_3020000_5_1206;Score=1.62e-05;Sequence=LYHLLLSDNSLVFQPW
SL2.30ch12_2120000_3020000_5	fimo	sequence_feature	2773068	2773115	2.13e-05	-	1	ID=HMM_SL2.30ch12_2120000_3020000_5_1207;Name=HMM_SL2.30ch12_2120000_3020000_5_1207;Score=2.13e-05;Sequence=LKVLDLGNNGINDTFP
SL2.30ch12_2120000_3020000_5	fimo	sequence_feature	2779845	2779892	3.26e-05	-	1	ID=HMM_SL2.30ch12_2120000_3020000_5_1208;Name=HMM_SL2.30ch12_2120000_3020000_5_1208;Score=3.26e-05;Sequence=LLELDISYTGISGELP
SL2.30ch12_2120000_3020000_5	fimo	sequence_feature	2319072	2319119	3.77e-05	-	1	ID=HMM_SL2.30ch12_2120000_3020000_5_1209;Name=HMM_SL2.30ch12_2120000_3020000_5_1209;Score=3.77e-05;Sequence=LVFLYLQCIHLITMVI
SL2.30ch12_2120000_3020000_5	fimo	sequence_feature	2794539	2794586	3.89e-05	-	1	ID=HMM_SL2.30ch12_2120000_3020000_5_1210;Name=HMM_SL2.30ch12_2120000_3020000_5_1210;Score=3.89e-05;Sequence=LVSLDLSYNECELDER
SL2.30ch12_2120000_3020000_5	fimo	sequence_feature	2764347	2764394	4.12e-05	-	1	ID=HMM_SL2.30ch12_2120000_3020000_5_1211;Name=HMM_SL2.30ch12_2120000_3020000_5_1211;Score=4.12e-05;Sequence=ETHLVIISNNLYKTIS
SL2.30ch12_2120000_3020000_5	fimo	sequence_feature	2292177	2292224	4.25e-05	-	1	ID=HMM_SL2.30ch12_2120000_3020000_5_1212;Name=HMM_SL2.30ch12_2120000_3020000_5_1212;Score=4.25e-05;Sequence=LIRVDLKNNFLIFNCP
SL2.30ch12_2120000_3020000_5	fimo	sequence_feature	2794242	2794289	4.65e-05	-	1	ID=HMM_SL2.30ch12_2120000_3020000_5_1213;Name=HMM_SL2.30ch12_2120000_3020000_5_1213;Score=4.65e-05;Sequence=LLELDISNTGISGELP
SL2.30ch12_2120000_3020000_5	fimo	sequence_feature	2311932	2311979	5.25e-05	-	1	ID=HMM_SL2.30ch12_2120000_3020000_5_1214;Name=HMM_SL2.30ch12_2120000_3020000_5_1214;Score=5.25e-05;Sequence=LRYKRLNENSKSNHIY
SL2.30ch12_2120000_3020000_5	fimo	sequence_feature	2152980	2153027	5.41e-05	-	1	ID=HMM_SL2.30ch12_2120000_3020000_5_1215;Name=HMM_SL2.30ch12_2120000_3020000_5_1215;Score=5.41e-05;Sequence=SAIGNLNMNSSIGLIE
SL2.30ch12_2120000_3020000_5	fimo	sequence_feature	2697003	2697050	6.3e-05	-	1	ID=HMM_SL2.30ch12_2120000_3020000_5_1216;Name=HMM_SL2.30ch12_2120000_3020000_5_1216;Score=6.3e-05;Sequence=LLRRHLSATSLSWEID
SL2.30ch12_2120000_3020000_5	fimo	sequence_feature	2514372	2514419	6.49e-05	-	1	ID=HMM_SL2.30ch12_2120000_3020000_5_1217;Name=HMM_SL2.30ch12_2120000_3020000_5_1217;Score=6.49e-05;Sequence=LLDLDVSQLFLKNSIV
SL2.30ch12_2120000_3020000_5	fimo	sequence_feature	2672061	2672108	7.54e-05	-	1	ID=HMM_SL2.30ch12_2120000_3020000_5_1218;Name=HMM_SL2.30ch12_2120000_3020000_5_1218;Score=7.54e-05;Sequence=LNDSSASYNNLQRKVH
SL2.30ch12_2120000_3020000_5	fimo	sequence_feature	2975295	2975342	8.25e-05	-	1	ID=HMM_SL2.30ch12_2120000_3020000_5_1219;Name=HMM_SL2.30ch12_2120000_3020000_5_1219;Score=8.25e-05;Sequence=LIFQDVSNLKLKWEID
SL2.30ch12_2120000_3020000_5	fimo	sequence_feature	2961513	2961560	8.25e-05	-	1	ID=HMM_SL2.30ch12_2120000_3020000_5_1220;Name=HMM_SL2.30ch12_2120000_3020000_5_1220;Score=8.25e-05;Sequence=LIFQDVSNLKLKWEID
SL2.30ch12_2120000_3020000_5	fimo	sequence_feature	2926185	2926232	8.75e-05	-	1	ID=HMM_SL2.30ch12_2120000_3020000_5_1221;Name=HMM_SL2.30ch12_2120000_3020000_5_1221;Score=8.75e-05;Sequence=NLLLILFNNKLQRVIE
SL2.30ch12_2120000_3020000_5	fimo	sequence_feature	2334018	2334065	8.75e-05	-	1	ID=HMM_SL2.30ch12_2120000_3020000_5_1222;Name=HMM_SL2.30ch12_2120000_3020000_5_1222;Score=8.75e-05;Sequence=LERYQHSEPNLHDPIK
SL2.30ch12_2120000_3020000_5	fimo	sequence_feature	2794317	2794364	9.27e-05	-	1	ID=HMM_SL2.30ch12_2120000_3020000_5_1223;Name=HMM_SL2.30ch12_2120000_3020000_5_1223;Score=9.27e-05;Sequence=LENLRLSDNHLLKGVL
SL2.30ch12_2120000_3020000_5	fimo	sequence_feature	2305647	2305694	9.27e-05	-	1	ID=HMM_SL2.30ch12_2120000_3020000_5_1224;Name=HMM_SL2.30ch12_2120000_3020000_5_1224;Score=9.27e-05;Sequence=LAILNMSRGKLKLKYC
SL2.30ch12_2120000_3020000_6	fimo	sequence_feature	2485062	2485109	1.03e-08	-	2	ID=HMM_SL2.30ch12_2120000_3020000_6_1225;Name=HMM_SL2.30ch12_2120000_3020000_6_1225;Score=1.03e-08;Sequence=LRVLDIANNSFSGLIP
SL2.30ch12_2120000_3020000_6	fimo	sequence_feature	2484780	2484827	1.28e-06	-	2	ID=HMM_SL2.30ch12_2120000_3020000_6_1226;Name=HMM_SL2.30ch12_2120000_3020000_6_1226;Score=1.28e-06;Sequence=LTSIDFTNNKLQGEIP
SL2.30ch12_2120000_3020000_6	fimo	sequence_feature	2484918	2484965	7.13e-06	-	2	ID=HMM_SL2.30ch12_2120000_3020000_6_1227;Name=HMM_SL2.30ch12_2120000_3020000_6_1227;Score=7.13e-06;Sequence=LKKIWLARNKFSGAIP
SL2.30ch12_2120000_3020000_6	fimo	sequence_feature	2228649	2228696	8.61e-06	-	2	ID=HMM_SL2.30ch12_2120000_3020000_6_1228;Name=HMM_SL2.30ch12_2120000_3020000_6_1228;Score=8.61e-06;Sequence=LGFLVLTFNKVRVEIG
SL2.30ch12_2120000_3020000_6	fimo	sequence_feature	2164920	2164967	2.02e-05	-	2	ID=HMM_SL2.30ch12_2120000_3020000_6_1229;Name=HMM_SL2.30ch12_2120000_3020000_6_1229;Score=2.02e-05;Sequence=LTLLNLSVYSLIFLHM
SL2.30ch12_2120000_3020000_6	fimo	sequence_feature	2268195	2268242	2.08e-05	-	2	ID=HMM_SL2.30ch12_2120000_3020000_6_1230;Name=HMM_SL2.30ch12_2120000_3020000_6_1230;Score=2.08e-05;Sequence=LSNSSLSSYRLHYSIV
SL2.30ch12_2120000_3020000_6	fimo	sequence_feature	2702655	2702702	2.32e-05	-	2	ID=HMM_SL2.30ch12_2120000_3020000_6_1231;Name=HMM_SL2.30ch12_2120000_3020000_6_1231;Score=2.32e-05;Sequence=FHILKCIHNSLNGYNP
SL2.30ch12_2120000_3020000_6	fimo	sequence_feature	2197455	2197502	2.59e-05	-	2	ID=HMM_SL2.30ch12_2120000_3020000_6_1232;Name=HMM_SL2.30ch12_2120000_3020000_6_1232;Score=2.59e-05;Sequence=FSFLRESWNLFQGTIR
SL2.30ch12_2120000_3020000_6	fimo	sequence_feature	2131791	2131838	3.77e-05	-	2	ID=HMM_SL2.30ch12_2120000_3020000_6_1233;Name=HMM_SL2.30ch12_2120000_3020000_6_1233;Score=3.77e-05;Sequence=LEQVNLQFRQLSCASP
SL2.30ch12_2120000_3020000_6	fimo	sequence_feature	2537736	2537783	4.65e-05	-	2	ID=HMM_SL2.30ch12_2120000_3020000_6_1234;Name=HMM_SL2.30ch12_2120000_3020000_6_1234;Score=4.65e-05;Sequence=LVRPNLSSNLINHIIN
SL2.30ch12_2120000_3020000_6	fimo	sequence_feature	2801202	2801249	5.09e-05	-	2	ID=HMM_SL2.30ch12_2120000_3020000_6_1235;Name=HMM_SL2.30ch12_2120000_3020000_6_1235;Score=5.09e-05;Sequence=LVNFYSSQRNLIGMQQ
SL2.30ch12_2120000_3020000_6	fimo	sequence_feature	2360289	2360336	5.09e-05	-	2	ID=HMM_SL2.30ch12_2120000_3020000_6_1236;Name=HMM_SL2.30ch12_2120000_3020000_6_1236;Score=5.09e-05;Sequence=LNQRSYSNNNLNTKKG
SL2.30ch12_2120000_3020000_6	fimo	sequence_feature	2221971	2222018	5.93e-05	-	2	ID=HMM_SL2.30ch12_2120000_3020000_6_1237;Name=HMM_SL2.30ch12_2120000_3020000_6_1237;Score=5.93e-05;Sequence=LHYCTIFCLSLNLSIP
SL2.30ch12_2120000_3020000_6	fimo	sequence_feature	2608392	2608439	6.69e-05	-	2	ID=HMM_SL2.30ch12_2120000_3020000_6_1238;Name=HMM_SL2.30ch12_2120000_3020000_6_1238;Score=6.69e-05;Sequence=FEKSNLSYNVLKVSPK
SL2.30ch12_2120000_3020000_6	fimo	sequence_feature	2599500	2599547	6.69e-05	-	2	ID=HMM_SL2.30ch12_2120000_3020000_6_1239;Name=HMM_SL2.30ch12_2120000_3020000_6_1239;Score=6.69e-05;Sequence=FEKSNLSYNVLKVSPK
SL2.30ch12_2120000_3020000_6	fimo	sequence_feature	2863731	2863778	7.54e-05	-	2	ID=HMM_SL2.30ch12_2120000_3020000_6_1240;Name=HMM_SL2.30ch12_2120000_3020000_6_1240;Score=7.54e-05;Sequence=SQILNLFFHHLHFPLE
SL2.30ch12_2120000_3020000_6	fimo	sequence_feature	2893347	2893394	9.01e-05	-	2	ID=HMM_SL2.30ch12_2120000_3020000_6_1241;Name=HMM_SL2.30ch12_2120000_3020000_6_1241;Score=9.01e-05;Sequence=LTILFLAFLFIIGLIT
SL2.30ch12_2120000_3020000_6	fimo	sequence_feature	2575191	2575238	9.55e-05	-	2	ID=HMM_SL2.30ch12_2120000_3020000_6_1242;Name=HMM_SL2.30ch12_2120000_3020000_6_1242;Score=9.55e-05;Sequence=IQLHSLRESHLVLEIP
SL2.30ch12_2120000_3020000_6	fimo	sequence_feature	2150745	2150792	9.55e-05	-	2	ID=HMM_SL2.30ch12_2120000_3020000_6_1243;Name=HMM_SL2.30ch12_2120000_3020000_6_1243;Score=9.55e-05;Sequence=LEILDEFHIRKGGKFM

## Sheet: Markers
Chromosome	Marker	BLAST start	BLAST end	Target length (nt)	Start location	End location
7	At5g14520	56224819	56224939
7	At1g78620	62215891	62217401	5992582	56000000	62220000
11	0124F20	1321754	1321972
11	136SP6	1857011	1857538	535784	1140000	1870000
12	At4g26180	2126199	2127414
12	At4g16710	3012635	3015270	889071	2120000	3020000

## Sheet: R genes in new loci
Cf locus	Reference	Coordinates start	Coordinates end	Candidate genes	Gene class	Study
CE	SL2.40ch07	57376615	57379665	RDC0002NLR0040	???	Jupe et al. 2013
CE	SL2.40ch07	57376807	57379383	Solyc07g049700.1.1	CC-NBS-LRR	Jupe et al. 2013
CE	SL2.40ch07	58542010	58545879	Solyc07g052770.2.1, Solyc07g052780.2.1	TIR-NBS-LRR	Jupe et al. 2013
CE	SL2.40ch07	58560010	58563287	Solyc07g052790.1.1	NBS-LRR	Jupe et al. 2013
CE	SL2.40ch07	58572434	58572982	Solyc07g052800.1.1	NBS fragment	Jupe et al. 2013
CE	SL2.40ch07	58750255	58752894	Solyc07g053010.1.1	CC-NBS-LRR	Jupe et al. 2013
CE	SL2.40ch07	58763610	58766168	Solyc07g053020.1.1	CC-NBS-LRR	Jupe et al. 2013
CE	SL2.40ch07	60757923	60760984	Solyc07g055380.1.1, Solyc07g055390.1.1	NBS-LRR	Jupe et al. 2013
CE	SL2.40ch07	60913415	60914479	Solyc07g055610.1.1, Solyc07g055620.1.1	NBS fragment	Jupe et al. 2013
Cf-11/Cf-3	SL2.40ch11	1181636	1184459	Solyc11g006520.1.1	CC-NBS-LRR	Jupe et al. 2013
Cf-11/Cf-3	SL2.40ch11	1186571	1189847	Solyc11g006530.1.1	CC-NBS-LRR	Jupe et al. 2013
Cf-11/Cf-3	SL2.40ch11	1237304	1240179	Solyc11g006630.1.1	CC-NBS-LRR	Jupe et al. 2013
Cf-11/Cf-3	SL2.40ch11	1242256	1245275	Solyc11g006640.1.1	CC-NBS-LRR	Jupe et al. 2013
AN	SL2.40ch12	2691878	2697588	RDC0002NLR0069	???	Jupe et al. 2013
AN	SL2.40ch12	2714559	2719247	Solyc12g009450.1.1	CC-NBS-LRR	Jupe et al. 2013
AN	SL2.40ch12	2723092	2725815	Solyc12g009460.1.1	CC-NBS-LRR	Jupe et al. 2013
CE	SL2.40ch07	57376807	57379383	Solyc07g049700	CC-NB-LRR	Andolfo et al. 2014
CE	SL2.40ch07	58542010	58545879	Solyc07g052770	TIR-NB-LRR	Andolfo et al. 2014
CE	SL2.40ch07	58547669	58548348	Solyc07g052780	TIR	Andolfo et al. 2014
CE	SL2.40ch07	58560010	58563287	Solyc07g052790	NB-LRR	Andolfo et al. 2014
CE	SL2.40ch07	58572434	58572982	RDC0002NLR0053	NB	Andolfo et al. 2014
CE	SL2.40ch07	58750255	58752894	Solyc07g053010	NB-LRR	Andolfo et al. 2014
CE	SL2.40ch07	58763610	58766168	Solyc07g053020	CC-NB-LRR	Andolfo et al. 2014
CE	SL2.40ch07	60757923	60762100	RDC0002NLR0054	TIR-NB-LRR	Andolfo et al. 2014
CE	SL2.40ch07	60911810	60915493	RDC0002NLR0055	NB-LRR	Andolfo et al. 2014
CE	SL2.40ch07	63073291	63074369	Solyc07g063360	TIR	Andolfo et al. 2014
Cf-11/Cf-3	SL2.40ch11	1181636	1184459	Solyc11g006520	CC-NB-LRR	Andolfo et al. 2014
Cf-11/Cf-3	SL2.40ch11	1186571	1189847	Solyc11g006530	NB-LRR	Andolfo et al. 2014
Cf-11/Cf-3	SL2.40ch11	1237304	1240179	Solyc11g006630	NB-LRR	Andolfo et al. 2014
Cf-11/Cf-3	SL2.40ch11	1242256	1245275	Solyc11g006640	CC-NB-LRR	Andolfo et al. 2014
Cf-11/Cf-3	SL2.40ch11	2028383	2031076	Solyc11g007790	NB-LRR	Andolfo et al. 2014
AN	SL2.40ch12	2714559	2719247	Solyc12g009450	CC-NB-LRR	Andolfo et al. 2014
AN	SL2.40ch12	2723092	2725815	Solyc12g009460	NB-LRR	Andolfo et al. 2014
CE	SL2.50ch07	57833875	57838397	Solyc07g044790.2.1	Non TIR-NBS-LRR	Wei et al. 2016
CE	SL2.50ch07	58209526	58209909	additional R genes	Non TIR-NBS-LRR	Wei et al. 2016
CE	SL2.50ch07	60053262	60055403	RDC0002NLR0040, Solyc07g049700.1.1	Non TIR-NBS-LRR	Wei et al. 2016
CE	SL2.50ch07	61218504	61225187	Solyc07g052770.2.1	TIR-NBS-LRR	Wei et al. 2016
CE	SL2.50ch07	61236510	61239787	Solyc07g052790.1.1	TIR-NBS-LRR	Wei et al. 2016
CE	SL2.50ch07	61248910	61249823	Solyc07g052800.1.1	TIR-NBS-LRR	Wei et al. 2016
CE	SL2.50ch07	61426758	61429355	Solyc07g053010.1.1	Non TIR-NBS-LRR	Wei et al. 2016
CE	SL2.50ch07	61440071	61441900	Solyc07g053020.1.1	Non TIR-NBS-LRR	Wei et al. 2016
CE	SL2.50ch07	63434426	63438558	Solyc07g055380.1.1	TIR-NBS-LRR	Wei et al. 2016
CE	SL2.50ch07	63588118	63592612	Solyc07g055610.1.1	TIR-NBS-LRR	Wei et al. 2016
Cf-11/Cf-3	SL2.50ch11	1177581	1177856	additional R genes	Non TIR-NBS-LRR	Wei et al. 2016
Cf-11/Cf-3	SL2.50ch11	1181735	1184459	Solyc11g006520.1.1	Non TIR-NBS-LRR	Wei et al. 2016
Cf-11/Cf-3	SL2.50ch11	1187249	1189847	Solyc11g006530.1.1	Non TIR-NBS-LRR	Wei et al. 2016
Cf-11/Cf-3	SL2.50ch11	1237304	1240179	Solyc11g006630.1.1	Non TIR-NBS-LRR	Wei et al. 2016
Cf-11/Cf-3	SL2.50ch11	1242256	1245175	Solyc11g006640.1.1	Non TIR-NBS-LRR	Wei et al. 2016
AN	SL2.50ch12	2693857	2696469	RDC0002NLR0097	NB-LRR	Wei et al. 2016
AN	SL2.50ch12	2694231	2696415	RDC0002NLR0069	Non TIR-NBS-LRR	Wei et al. 2016
AN	SL2.50ch12	2714559	2718813	Solyc12g009450.1.1	Non TIR-NBS-LRR	Wei et al. 2016
AN	SL2.50ch12	2723092	2725764	Solyc12g009460.1.1	Non TIR-NBS-LRR	Wei et al. 2016
CE	SL2.50ch07	62251710	62253284	Solyc07g053840	RLP	Kang & Yeom 2018
CE	SL2.50ch07	63745208	63748093	Solyc07g055820	RLP	Kang & Yeom 2018
AN	SL2.50ch12	2767149	2774948	Solyc12g009510	RLP	Kang & Yeom 2018
AN	SL2.50ch12	2775997	2780044	Solyc12g009520	RLP	Kang & Yeom 2018
AN	SL2.50ch12	2779893	2781945	Solyc12g009530	RLP	Kang & Yeom 2018
AN	SL2.50ch12	2940289	2942486	Solyc12g009690	RLP	Kang & Yeom 2018
AN	SL2.50ch12	2953277	2956260	Solyc12g009720	RLP	Kang & Yeom 2018
AN	SL2.50ch12	2958791	2962655	Solyc12g009730	RLP	Kang & Yeom 2018
AN	SL2.50ch12	2962653	2970781	Solyc12g009740	RLP	Kang & Yeom 2018
AN	SL2.50ch12	2972575	2976439	Solyc12g009750	RLP	Kang & Yeom 2018
AN	SL2.50ch12	2985352	2990034	Solyc12g009770	RLP	Kang & Yeom 2018
AN	SL2.50ch12	2988572	2996181	Solyc12g009780	RLP	Kang & Yeom 2018
